# Supplementary material for: Reporting of financial conflicts of interest in clinical practice guidelines: a case study analysis of guidelines from the Canadian Medical Association Infobase
Source: PubMed Central journal article supplement (PMC4986411; doi:10.1186/s12913-016-1646-5), 2016-08-15
Supplement: 12913_2016_1646_MOESM1_ESM.pdf [file 12913_2016_1646_MOESM1_ESM.pdf]

**Appendix 1: All clinical practice guidelines from Canadian Medical Association (CMA) Infobase as of 06 November 2013**

Note: Highlighted guidelines were most recently reviewed or published between 01 January 2012 and 06 November 2013, inclusive.

| Total | Category in CMA Infobase | Organization                                                                                  | Clinical Practice Guideline Title                                                                                                                                                                                            | Date most recently reviewed or published (reverse chronological order) |
|-------|--------------------------|-----------------------------------------------------------------------------------------------|------------------------------------------------------------------------------------------------------------------------------------------------------------------------------------------------------------------------------|------------------------------------------------------------------------|
| 1     | C                        | Canadian Network for Mood and Anxiety Treatments                                              | Canadian Network for Mood and Anxiety Treatments (CANMAT) guidelines for the management of patients with bipolar disorder: update 2007                                                                                       | 2006-Dec (Reviewed 2013)                                               |
| 2     | C                        | Canadian Stroke Network                                                                       | Canadian best practice recommendations for stroke care                                                                                                                                                                       | 2010 (Reviewed 2013)                                                   |
| 3     | L                        | Collège des médecins du Québec                                                                | Les niveaux de consommation d'alcool à faible risque : guide pour les médecins et les professionnels de la santé                                                                                                             | 2013                                                                   |
| 4     | L                        | Collège des médecins du Québec                                                                | Low-risk drinking guidelines : a guide for physicians and health care professionals                                                                                                                                          | 2013                                                                   |
| 5     | T                        | Canadian Hypertension Education Program                                                       | The 2012-2013 Canadian Hypertension Education Program (CHEP) guidelines for pharmacists: an update                                                                                                                           | 2013                                                                   |
| 6     | C                        | Canadian Network for Mood and Anxiety Treatments                                              | Canadian Network for Mood and Anxiety Treatments (CANMAT) guidelines for the management of patients with bipolar disorder : consensus and controversies                                                                      | 2005-June (Reviewed 2013)                                              |
| 7     | C                        | International Society for Bipolar Disorders; Canadian Network for Mood and Anxiety Treatments | Canadian Network for Mood and Anxiety Treatments (CANMAT) and International Society for Bipolar Disorders (ISBD) collaborative update of CANMAT guidelines for the management of patients with bipolar disorder: update 2009 | 2009-May (Reviewed 2013)                                               |
| 8     | T                        | Canadian Paediatric Society                                                                   | Trampoline use in homes and playgrounds                                                                                                                                                                                      | 2007-Aug-1 (Reviewed 2013-Jan-30)                                      |
| 9     | L                        | Société canadienne de pédiatrie                                                               | L'utilisation des trampolines à la maison et au terrain de jeux                                                                                                                                                              | 2007-août-1 (Reviewed 2013-janv-30)                                    |
| 10    | E                        | Société des obstétriciens et gynécologues du Canada                                           | État actuel du dépistage prénatal non effractif du syndrome de Down, de la trisomie 18 et de la trisomie 13 au moyen d'ADN acellulaire se trouvant dans le plasma maternel                                                   | 2013-janv                                                              |
| 11    | H                        | Société canadienne des anesthésiologistes                                                     | Guide d'exercice de l'anesthésie                                                                                                                                                                                             | 2013-janv                                                              |

|    |     |                                                                                                    |                                                                                                                                                                         |             |
|----|-----|----------------------------------------------------------------------------------------------------|-------------------------------------------------------------------------------------------------------------------------------------------------------------------------|-------------|
| 12 | L   | Société des obstétriciens et gynécologues du Canada                                                | Liste de contrôle de la sécurité chirurgicale en obstétrique-gynécologie                                                                                                | 2013-janv   |
| 13 | T   | Société des obstétriciens et gynécologues du Canada                                                | Toxoplasmose pendant la grossesse : Prévention, dépistage et traitement                                                                                                 | 2013-janv   |
| 14 | R   | Canadian Task Force on Preventive Health Care                                                      | Recommendations on screening for cervical cancer                                                                                                                        | 2013-Jan-8  |
| 15 | F   | Guidelines and Protocols Advisory Committee (BC)                                                   | Follow-up of colorectal polyps or cancer                                                                                                                                | 2013-Jan-16 |
| 16 | C   | Society of Obstetricians and Gynaecologists of Canada                                              | Current status in non-invasive prenatal detection of down syndrome, trisomy 18, and trisomy 13 using cell-free DNA in maternal plasma                                   | 2013-Jan    |
| 17 | H   | Canadian Anesthesiologists' Society                                                                | Guidelines to the practice of anesthesia                                                                                                                                | 2013-Jan    |
| 18 | M   | Canadian Association of Genitourinary Medical Oncologists                                          | Management of small cell carcinoma of the bladder: Consensus guidelines from the Canadian Association of Genitourinary Medical Oncologists (CAGMO)                      | 2013-Jan    |
| 19 | S   | Canadian Thoracic Society                                                                          | Spirometry in primary care                                                                                                                                              | 2013-Jan    |
| 20 | S   | Society of Obstetricians and Gynaecologists of Canada                                              | Surgical safety checklist in obstetrics and gynaecology                                                                                                                 | 2013-Jan    |
| 21 | T   | Society of Obstetricians and Gynaecologists of Canada                                              | Toxoplasmosis in pregnancy: Prevention, screening, and treatment                                                                                                        | 2013-Jan    |
| 22 | R   | Fondation des maladies du coeur du Canada; Réseau canadien contre les accidents cérébrovasculaires | Recommandations canadiennes pour les pratiques optimales de soins de l'AVC : Chapitre 2. prévention                                                                     | 2013-fév-21 |
| 23 | C   | Réseau canadien contre les accidents cérébrovasculaires                                            | Canadian Best Practice Recommendations for Stroke Care                                                                                                                  | 2013-fév    |
| 24 | P   | Programme éducatif canadien sur l'hypertension                                                     | PECH recommandations 2013 pour la prise en charge de l'hypertension artérielle                                                                                          | 2013-fév    |
| 25 | 0-9 | Canadian Cardiovascular Society                                                                    | 2012 update of the Canadian Cardiovascular Society guidelines for the diagnosis and treatment of dyslipidemia for the prevention of cardiovascular disease in the adult | 2013-Feb    |

|    |   |                                                                                                    |                                                                                                                                                                                                                              |            |
|----|---|----------------------------------------------------------------------------------------------------|------------------------------------------------------------------------------------------------------------------------------------------------------------------------------------------------------------------------------|------------|
| 26 | C | Canadian Cardiovascular Society                                                                    | Canadian Cardiovascular Society guidelines on the use of cardiac resynchronization therapy: Evidence and patient selection                                                                                                   | 2013-Feb   |
| 27 | C | Canadian Network for Mood and Anxiety Treatments                                                   | Canadian Network for Mood and Anxiety Treatments (CANMAT) and International Society for Bipolar Disorders (ISBD) collaborative update of CANMAT guidelines for the management of patients with bipolar disorder: update 2013 | 2013-Feb   |
| 28 | C | Canadian Hypertension Education Program                                                            | CHEP 2013 recommendations for management of hypertension                                                                                                                                                                     | 2013-Feb   |
| 29 | T | Canadian Cardiovascular Society                                                                    | The 2012 Canadian Cardiovascular Society heart failure management guidelines update: Focus on acute and chronic heart failure                                                                                                | 2013-Feb   |
| 30 | C | Société des obstétriciens et gynécologues du Canada                                                | Chimiothérapie anticancéreuse et grossesse                                                                                                                                                                                   | 2013-mars  |
| 31 | D | Comité consultatif de la médecine tropicale et de la médecine des voyages (CCMTMV)                 | Déclaration sur la fièvre jaune à l'intention des voyageurs                                                                                                                                                                  | 2013-mars  |
| 32 | R | Fondation des maladies du coeur du Canada; Réseau canadien contre les accidents cérébrovasculaires | Recommandations canadiennes pour les pratiques optimales de soins de l'AVC : Chapitre 7. humeur et cognition post-AVC                                                                                                        | 2013-mars  |
| 33 | C | Guidelines and Protocols Advisory Committee (BC)                                                   | Colorectal screening for cancer prevention in asymptomatic patients                                                                                                                                                          | 2013-Mar-1 |
| 34 | A | Registered Nurses' Association of Ontario                                                          | Assessment and management of foot ulcers for people with diabetes                                                                                                                                                            | 2013-Mar   |
| 35 | B | Cancer Care Ontario's Program in Evidence-based Care                                               | Bortezomib in multiple myeloma and lymphoma                                                                                                                                                                                  | 2013-Mar   |
| 36 | C | Heart and Stroke Foundation of Canada; Canadian Stroke Network                                     | Canadian best practice recommendations for stroke care : chapter 7. mood and cognition in patients following stroke                                                                                                          | 2013-Mar   |
| 37 | C | Society of Obstetricians and Gynaecologists of Canada                                              | Cancer chemotherapy and pregnancy                                                                                                                                                                                            | 2013-Mar   |
| 38 | H | Ontario Association of Medical Laboratories                                                        | Guidelines for ordering urine testing for drugs-of-abuse: Targeted and screening tests                                                                                                                                       | 2013-Mar   |

|    |   |                                                                |                                                                                                                                                                                                                    |                              |
|----|---|----------------------------------------------------------------|--------------------------------------------------------------------------------------------------------------------------------------------------------------------------------------------------------------------|------------------------------|
| 39 | P | Alberta Health Services - Cancer Care                          | Proton beam radiation therapy                                                                                                                                                                                      | 2013-Mar                     |
| 40 | R | Canadian Agency for Drugs and Technologies in Health           | Recommendations for antithrombotic agents for the prevention of stroke and systemic embolism in patients with atrial fibrillation                                                                                  | 2013-Mar                     |
| 41 | S | Committee to Advise on Tropical Medicine and Travel (CATMAT)   | Statement for travellers and yellow fever                                                                                                                                                                          | 2013-Mar                     |
| 42 | P | Guidelines and Protocols Advisory Committee (BC)               | Problem drinking                                                                                                                                                                                                   | 2011-Apr (Reviewed 2013-Apr) |
| 43 | L | Société canadienne de pédiatrie                                | Le sevrage de l'allaitement                                                                                                                                                                                        | 2013-avril                   |
| 44 | C | Canadian Urological Association                                | CUA-CUOG guidelines for the management of castration-resistant prostate cancer (CRPC): 2013 update                                                                                                                 | 2013-Aug                     |
| 45 | I | Society of Obstetricians and Gynaecologists of Canada          | Intrauterine growth restriction: screening, diagnosis, and management                                                                                                                                              | 2013-Aug                     |
| 46 | M | Canadian Kidney Cancer Forum                                   | Management of advanced kidney cancer: Canadian Kidney Cancer Forum 2013 consensus update                                                                                                                           | 2013-Aug                     |
| 47 | C | Canadian Cardiovascular Society; Canadian Heart Rhythm Society | Canadian Cardiovascular Society/Canadian Heart Rhythm Society joint position statement on the use of remote monitoring for cardiovascular implantable electronic device follow-up                                  | 2013-Apr                     |
| 48 | C | Canadian Diabetes Association                                  | Canadian Diabetes Association 2013 clinical practice guidelines for the prevention and management of diabetes in Canada                                                                                            | 2013-Apr                     |
| 49 | C | Canadian Diabetes Association                                  | Canadian Diabetes Association 2013 clinical practice guidelines for the prevention and management of diabetes in Canada : Definition, classification and diagnosis of diabetes, prediabetes and metabolic syndrome | 2013-Apr                     |
| 50 | C | Canadian Diabetes Association                                  | Canadian Diabetes Association 2013 clinical practice guidelines for the prevention and management of diabetes in Canada : Diabetes and pregnancy                                                                   | 2013-Apr                     |

|    |   |                               |                                                                                                                                                                       |          |
|----|---|-------------------------------|-----------------------------------------------------------------------------------------------------------------------------------------------------------------------|----------|
| 51 | C | Canadian Diabetes Association | Canadian Diabetes Association 2013 clinical practice guidelines for the prevention and management of diabetes in Canada : Diabetes in the elderly                     | 2013-Apr |
| 52 | C | Canadian Diabetes Association | Canadian Diabetes Association 2013 clinical practice guidelines for the prevention and management of diabetes in Canada : Hyperglycemic emergencies in adults         | 2013-Apr |
| 53 | C | Canadian Diabetes Association | Canadian Diabetes Association 2013 clinical practice guidelines for the prevention and management of diabetes in Canada : Hypoglycemia                                | 2013-Apr |
| 54 | C | Canadian Diabetes Association | Canadian Diabetes Association 2013 clinical practice guidelines for the prevention and management of diabetes in Canada : Introduction                                | 2013-Apr |
| 55 | C | Canadian Diabetes Association | Canadian Diabetes Association 2013 clinical practice guidelines for the prevention and management of diabetes in Canada : Methods                                     | 2013-Apr |
| 56 | C | Canadian Diabetes Association | Canadian Diabetes Association 2013 clinical practice guidelines for the prevention and management of diabetes in Canada : Monitoring glycemic control                 | 2013-Apr |
| 57 | C | Canadian Diabetes Association | Canadian Diabetes Association 2013 clinical practice guidelines for the prevention and management of diabetes in Canada : Nutrition therapy                           | 2013-Apr |
| 58 | C | Canadian Diabetes Association | Canadian Diabetes Association 2013 clinical practice guidelines for the prevention and management of diabetes in Canada : Organization of diabetes care               | 2013-Apr |
| 59 | C | Canadian Diabetes Association | Canadian Diabetes Association 2013 clinical practice guidelines for the prevention and management of diabetes in Canada : Pharmacologic management of type 2 diabetes | 2013-Apr |

|    |   |                                                       |                                                                                                                                                                    |                               |
|----|---|-------------------------------------------------------|--------------------------------------------------------------------------------------------------------------------------------------------------------------------|-------------------------------|
| 60 | C | Canadian Diabetes Association                         | Canadian Diabetes Association 2013 clinical practice guidelines for the prevention and management of diabetes in Canada : Pharmacotherapy in type 1 diabetes       | 2013-Apr                      |
| 61 | C | Canadian Diabetes Association                         | Canadian Diabetes Association 2013 clinical practice guidelines for the prevention and management of diabetes in Canada : Physical activity and diabetes           | 2013-Apr                      |
| 62 | C | Canadian Diabetes Association                         | Canadian Diabetes Association 2013 clinical practice guidelines for the prevention and management of diabetes in Canada : Reducing the risk of developing diabetes | 2013-Apr                      |
| 63 | C | Canadian Diabetes Association                         | Canadian Diabetes Association 2013 clinical practice guidelines for the prevention and management of diabetes in Canada : Screening for type 1 and type 2 diabetes | 2013-Apr                      |
| 64 | C | Canadian Diabetes Association                         | Canadian Diabetes Association 2013 clinical practice guidelines for the prevention and management of diabetes in Canada : Self-management education                | 2013-Apr                      |
| 65 | C | Canadian Diabetes Association                         | Canadian Diabetes Association 2013 clinical practice guidelines for the prevention and management of diabetes in Canada : Targets for glycemic control             | 2013-Apr                      |
| 66 | C | Canadian Diabetes Association                         | Canadian Diabetes Association 2013 clinical practice guidelines for the prevention and management of diabetes in Canada : Type 2 diabetes in aboriginal peoples    | 2013-Apr                      |
| 67 | H | Public Health Ontario                                 | Guidelines for testing and treatment of gonorrhoea in Ontario                                                                                                      | 2013-Apr                      |
| 68 | T | Society of Obstetricians and Gynaecologists of Canada | The role of adjuvant therapy in endometrial cancer                                                                                                                 | 2013-Apr                      |
| 69 | W | Canadian Paediatric Society                           | Weaning from the breast                                                                                                                                            | 2013-Apr                      |
| 70 | S | College of Physicians and Surgeons of Ontario         | Sleep medicine - 3rd Edition, September 2010                                                                                                                       | 2010-Sept (Reviewed 2013-May) |

|    |   |                                                                                                    |                                                                                                                                                                           |             |
|----|---|----------------------------------------------------------------------------------------------------|---------------------------------------------------------------------------------------------------------------------------------------------------------------------------|-------------|
| 71 | L | Société canadienne de pédiatrie                                                                    | La prise en charge du patient d'âge pédiatrique victime d'un traumatisme crânien aigu                                                                                     | 2013-mai-3  |
| 72 | R | Fondation des maladies du coeur du Canada; Réseau canadien contre les accidents cérébrovasculaires | Recommandations canadiennes pour les pratiques optimales de soins de l'AVC : chapitre 3. soins de l'AVC en phase hyperaiguë                                               | 2013-mai    |
| 73 | R | Fondation des maladies du coeur du Canada                                                          | Recommandations canadiennes pour les pratiques optimales de soins de l'AVC: Chapitre 4. soins du patient avec AVC aigu hospitalisé                                        | 2013-mai    |
| 74 | S | Société des obstétriciens et gynécologues du Canada                                                | Saignements utérins anormaux chez les femmes préménopausées                                                                                                               | 2013-mai    |
| 75 | M | Canadian Paediatric Society                                                                        | Management of the paediatric patient with acute head trauma                                                                                                               | 2013-May-3  |
| 76 | R | Canadian Task Force on Preventive Health Care                                                      | Recommendations on screening for depression in adults                                                                                                                     | 2013-May-13 |
| 77 | A | Society of Obstetricians and Gynaecologists of Canada                                              | Abnormal uterine bleeding in premenopausal women                                                                                                                          | 2013-May    |
| 78 | A | Perinatal Services BC                                                                              | Antidepressant use during pregnancy: considerations for the newborn exposed to SSRIs/SNRIs                                                                                | 2013-May    |
| 79 | C | Heart and Stroke Foundation of Canada; Canadian Stroke Network                                     | Canadian best practice recommendations for stroke care : chapter 3. hyperacute stroke care                                                                                | 2013-May    |
| 80 | C | Heart and Stroke Foundation of Canada                                                              | Canadian best practice recommendations for stroke care : chapter 4. acute inpatient stroke care                                                                           | 2013-May    |
| 81 | R | Cancer Care Ontario's Program in Evidence-based Care                                               | Routine HPV testing in head and neck squamous cell carcinoma                                                                                                              | 2013-May    |
| 82 | T | Canadian Hypertension Education Program                                                            | The 2013 Canadian Hypertension Education Program Recommendations for blood pressure measurement, diagnosis, assessment of risk, prevention, and treatment of hypertension | 2013-May    |
| 83 | A | Guidelines and Protocols Advisory Committee (BC)                                                   | Antinuclear antibody (ANA) testing for connective tissue disease                                                                                                          | 2013-June   |
| 84 | L | Collège des médecins du Québec; Institut national de santé publique du Québec                      | Le dépistage du cancer de la prostate - mise à jour 2013                                                                                                                  | 2013-juin   |

|    |   |                                                                |                                                                                                                                                   |            |
|----|---|----------------------------------------------------------------|---------------------------------------------------------------------------------------------------------------------------------------------------|------------|
| 85 | E | Cancer Care Ontario's Program in Evidence-based Care           | Evidence-based guideline recommendations on low-dose rate brachytherapy in patients with low- or intermediate-risk prostate cancer                | 2013-June  |
| 86 | B | British Columbia Centre for Excellence in HIV/AIDS             | British Columbia guidelines for the care of HIV positive pregnant women and interventions to reduce perinatal transmission guidelines             | 2013-July  |
| 87 | C | Heart and Stroke Foundation of Canada                          | Canadian best practice recommendations for stroke care : chapter 5. stroke rehabilitation                                                         | 2013-July  |
| 88 | C | Public Health Agency of Canada                                 | Canadian guidelines on sexually transmitted infections : Gonococcal infections                                                                    | 2013-July  |
| 89 | O | Canadian Agency for Drugs and Technologies in Health           | Optimal use recommendations for second- and third-line therapy for patients with type 2 diabetes                                                  | 2013-July  |
| 90 | R | Fondation des maladies du coeur du Canada                      | Recommandations canadiennes pour les pratiques optimales de soins de l'AVC : Chapitre 5. réadaptation post-AVC                                    | 2013-juill |
| 91 | P | Canadian Kidney Cancer Forum                                   | Prise en charge du cancer du rein de stade avancé : Mise à jour 2013 des lignes directrices consensuelles du Forum canadien sur le cancer du rein | 2013-août  |
| 92 | R | Société des obstétriciens et gynécologues du Canada            | Retard de croissance intra-utérin : Dépistage, diagnostic et prise en charge                                                                      | 2013-août  |
| 93 | C | Heart and Stroke Foundation of Canada; Canadian Stroke Network | Canadian best practice recommendations for stroke care : chapter 8. telestroke                                                                    | 2013-Sept  |
| 94 | C | Canadian Headache Society                                      | Canadian Headache Society guideline : acute drug therapy for migraine headache                                                                    | 2013-Sept  |
| 95 | H | Ontario Neurotrauma Foundation                                 | Guidelines for concussion/mild traumatic brain injury & persistent symptoms: second edition                                                       | 2013-Sept  |
| 96 | I | Society of Obstetricians and Gynaecologists of Canada          | Induction of labour at term                                                                                                                       | 2013-Sept  |
| 97 | R | Groupe d'étude canadien sur les soins de santé préventifs      | Recommandations pour le dépistage de l'hypertension chez les adultes canadiens                                                                    | 2013-sept  |
| 98 | R | Canadian Task Force on Preventive Health Care                  | Recommendations on screening for high blood pressure in Canadian adults                                                                           | 2013-Sept  |



|     |     |                                                                                                                                                                              |                                                                                                                             |           |
|-----|-----|------------------------------------------------------------------------------------------------------------------------------------------------------------------------------|-----------------------------------------------------------------------------------------------------------------------------|-----------|
| 99  | S   | Cancer Care Ontario's Program in Evidence-based Care                                                                                                                         | Screening high-risk populations for lung cancer                                                                             | 2013-Sept |
| 100 | S   | Société canadienne de pédiatrie                                                                                                                                              | Soutenir la santé mentale des enfants et des adolescents de parents qui se séparent                                         | 2013-sept |
| 101 | S   | Canadian Paediatric Society                                                                                                                                                  | Supporting the mental health of children and youth of separating parents                                                    | 2013-Sept |
| 102 | C   | Canadian Association of Gastroenterology                                                                                                                                     | Canadian Association of Gastroenterology position statement: Hip fracture and proton pump inhibitor therapy – a 2013 update | 2013-Oct  |
| 103 | C   | Canadian Cardiovascular Society                                                                                                                                              | Canadian Cardiovascular Society guidelines on the use of cardiac resynchronization therapy: Implementation                  | 2013-Nov  |
| 104 | C   | Canadian Cardiovascular Society                                                                                                                                              | Canadian Cardiovascular Society position statement on radiation exposure from cardiac imaging and interventional procedures | 2013-Nov  |
| 105 | 0-9 | Canadian Pain Society                                                                                                                                                        | 2012 Canadian Guidelines for the diagnosis and management of fibromyalgia syndrome                                          | 2012      |
| 106 | A   | Alberta Health and Wellness                                                                                                                                                  | Alberta treatment guidelines for sexually transmitted infections (STI) in adolescents and adults 2012                       | 2012      |
| 107 | C   | Public Health Agency of Canada                                                                                                                                               | Canadian immunization guide                                                                                                 | 2012      |
| 108 | C   | Canadian Action Network for the Advancement, Dissemination and Adoption of Practice-informed Tobacco Treatment (CAN-ADAPTT)                                                  | Canadian smoking cessation clinical practice guideline                                                                      | 2012      |
| 109 | L   | Collège des médecins du Québec; Agence de la santé et de services sociaux de Montréal                                                                                        | L'évaluation médicale périodique de l'adulte                                                                                | 2012      |
| 110 | L   | Réseau d'action canadien pour l'avancement, la dissémination et l'adoption de pratiques en matière de traitement du tabagisme fondées sur l'expérience clinique (CAN-ADAPTT) | Lignes directrices canadiennes de pratique clinique sur le renoncement au tabagisme                                         | 2012      |
| 111 | R   | Canadian Task Force on Preventive Health Care                                                                                                                                | Recommendations on screening for high blood pressure in Canadian adults                                                     | 2012      |

|     |   |                                                                   |                                                                                                                                  |                                |
|-----|---|-------------------------------------------------------------------|----------------------------------------------------------------------------------------------------------------------------------|--------------------------------|
| 112 | T | Association of Medical Microbiology and Infectious Disease Canada | The use of antiviral drugs for influenza: Guidance for practitioners 2012/2013                                                   | 2012                           |
| 113 | L | Société canadienne de pédiatrie                                   | Les recommandations sur l'usage des sucettes                                                                                     | 2003-oct (Reviewed 2012-janv)  |
| 114 | O | Cancer Care Ontario's Program in Evidence-based Care              | Optimal therapy for patients diagnosed with multiple myeloma and the role of high-dose chemotherapy and stem cell support        | 2003-Oct (Reviewed 2012-Jan)   |
| 115 | R | Canadian Paediatric Society                                       | Recommendations for the use of pacifiers                                                                                         | 2003-Oct (Reviewed 2012-Jan)   |
| 116 | L | Société canadienne de pédiatrie                                   | La question des soins aux adolescents hospitalisés                                                                               | 2008-janv (Reviewed 2012-janv) |
| 117 | L | Société canadienne de pédiatrie                                   | La réduction des méfaits : Une démarche pour réduire les comportements à risque des adolescents en matière de santé              | 2008-janv (Reviewed 2012-janv) |
| 118 | I | Canadian Paediatric Society                                       | Issues of care for hospitalized youth                                                                                            | 2008-Jan (Reviewed 2012-Jan)   |
| 119 | L | Société canadienne de pédiatrie                                   | La prise en charge de l'énurésie nocturne primaire                                                                               | 2010-fév (Reviewed 2012-janv)  |
| 120 | M | Canadian Paediatric Society                                       | Management of primary nocturnal enuresis                                                                                         | 2010-Feb (Reviewed 2012-Jan)   |
| 121 | L | Société canadienne de pédiatrie                                   | Les répercussions de la fréquentation des services de garde sur la santé des enfants: Partie B : Les blessures et les infections | 2009-janv (Reviewed 2012-janv) |
| 122 | L | Société canadienne de pédiatrie                                   | Les blessures par piqûre d'aiguille dans un lieu public                                                                          | 2008 (Reviewed 2012-janv)      |
| 123 | N | Canadian Paediatric Society                                       | Needle stick injuries in the community                                                                                           | 2008 (Reviewed 2012-Jan)       |
| 124 | M | Alberta Health Services - Cancer Care                             | Magnetic resonance imaging for breast cancer screening, pre-operative assessment, and follow-up                                  | 2010-Oct (Reviewed 2012-Jan)   |
| 125 | D | Société canadienne de pédiatrie                                   | Des considérations particulières pour la supervision médicale des enfants et des adolescents en famille d'accueil                | 2008-fév (Reviewed 2012-janv)  |
| 126 | S | Canadian Paediatric Society                                       | Special considerations for the health supervision of children and youth in foster care                                           | 2008-Feb (Reviewed 2012-Jan)   |
| 127 | L | Société canadienne de pédiatrie                                   | Le dépistage du VIH pendant la grossesse                                                                                         | 2008-mars (Reviewed 2012-janv) |
| 128 | T | Canadian Paediatric Society                                       | Testing for HIV infection in pregnancy                                                                                           | 2008-Mar (Reviewed 2012-Jan)   |
| 129 | S | Manitoba Health and Healthy Living                                | Sexually transmitted infections treatment guidelines                                                                             | 2008-Apr (Reviewed 2012-Jan)   |

|     |   |                                       |                                                                                                |                                 |
|-----|---|---------------------------------------|------------------------------------------------------------------------------------------------|---------------------------------|
| 130 | L | Société canadienne de pédiatrie       | Le contrôle des infections au cabinet du pédiatre                                              | 2008-juin (Reviewed 2012-janv)  |
| 131 | L | Société canadienne de pédiatrie       | La transmission verticale du virus de l'hépatite C : les connaissances et les enjeux courants  | 2008-juill (Reviewed 2012-janv) |
| 132 | V | Canadian Paediatric Society           | Vertical transmission of the hepatitis C virus : current knowledge and issues                  | 2008-July (Reviewed 2012-Jan)   |
| 133 | I | Canadian Paediatric Society           | Infection control in paediatric office settings                                                | 2008-June (Reviewed 2012-Jan)   |
| 134 | T | Alberta Health Services - Cancer Care | Testicular germ cell tumours                                                                   | 2005-Apr (Reviewed 2012-Jan)    |
| 135 | L | Société canadienne de pédiatrie       | L'homéopathie dans la population pédiatrique                                                   | 2005-mars (Reviewed 2012-janv)  |
| 136 | L | Société canadienne de pédiatrie       | La mesure de la température en pédiatrie                                                       | 2005-mars (Reviewed 2012-janv)  |
| 137 | T | Canadian Paediatric Society           | Temperature measurement in paediatrics                                                         | 2005-Mar (Reviewed 2012-Jan)    |
| 138 | A | Canadian Paediatric Society           | Antimicrobial products in the home : the evolving problem of antibiotic resistance             | 2006-Mar (Reviewed 2012-Jan)    |
| 139 | L | Société canadienne de pédiatrie       | La grossesse à l'adolescence                                                                   | 2006-avril (Reviewed 2012-janv) |
| 140 | A | Canadian Paediatric Society           | Adolescent pregnancy                                                                           | 2006-Apr (Reviewed 2012-Jan)    |
| 141 | L | Société canadienne de pédiatrie       | L'adoption interracial                                                                         | 2006-sept (Reviewed 2012-janv)  |
| 142 | T | Canadian Paediatric Society           | Transracial adoption                                                                           | 2006-Sept (Reviewed 2012-Jan)   |
| 143 | L | Société canadienne de pédiatrie       | La paralysie périnatale du plexus brachial                                                     | 2006-fév (Reviewed 2012-janv)   |
| 144 | P | Canadian Paediatric Society           | Perinatal brachial plexus palsy                                                                | 2006-Feb (Reviewed 2012-Jan)    |
| 145 | L | Société canadienne de pédiatrie       | Les soins aux adolescents ayant une maladie chronique                                          | 2006-janv (Reviewed 2012-janv)  |
| 146 | C | Canadian Paediatric Society           | Care of adolescents with chronic conditions                                                    | 2006-Jan (Reviewed 2012-Jan)    |
| 147 | L | Société canadienne de pédiatrie       | L'orientation sexuelle des adolescents                                                         | 2008-sept (Reviewed 2012-janv)  |
| 148 | U | Société canadienne de pédiatrie       | Une morsure dans la salle de jeu : la prise en charge des morsures humaines en milieu de garde | 2008-sept (Reviewed 2012-janv)  |
| 149 | A | Canadian Paediatric Society           | A bite in the playroom: managing human bites in child care settings                            | 2008-Sept (Reviewed 2012-Jan)   |
| 150 | A | Canadian Paediatric Society           | Adolescent sexual orientation                                                                  | 2008-Sept (Reviewed 2012-Jan)   |
| 151 | L | Société canadienne de pédiatrie       | Les infestations par les poux de tête : Une mise à jour clinique                               | 2008-oct (Reviewed 2012-janv)   |
| 152 | M | Alberta Health Services - Cancer Care | Management of febrile neutropenia in adult cancer patients                                     | 2008-Nov (Reviewed 2012-Jan)    |

|     |   |                                 |                                                                                                                                                                                                               |                                 |
|-----|---|---------------------------------|---------------------------------------------------------------------------------------------------------------------------------------------------------------------------------------------------------------|---------------------------------|
| 153 | L | Société canadienne de pédiatrie | Les répercussions de la fréquentation des services de garde sur la santé des enfants: Partie A : Les tendances canadiennes des issues du comportement et du développement sur les enfants en service de garde | 2008-déc (Reviewed 2012-janv)   |
| 154 | L | Société canadienne de pédiatrie | Les voyages en avion et la santé des enfants                                                                                                                                                                  | 2007-janv (Reviewed 2012-janv)  |
| 155 | A | Canadian Paediatric Society     | Air travel and children's health issues                                                                                                                                                                       | 2007-Jan (Reviewed 2012-Jan)    |
| 156 | L | Société canadienne de pédiatrie | La prévention du syndrome de rubéole congénitale                                                                                                                                                              | 2007-fév (Reviewed 2012-janv)   |
| 157 | P | Canadian Paediatric Society     | Prevention of congenital rubella syndrome                                                                                                                                                                     | 2007-Feb (Reviewed 2012-Jan)    |
| 158 | L | Société canadienne de pédiatrie | Les troubles envahissants du développement : aucune relation causale avec les vaccins                                                                                                                         | 2007-juin (Reviewed 2012-janv)  |
| 159 | A | Canadian Paediatric Society     | Autistic spectrum disorder: no causal relationship with vaccines                                                                                                                                              | 2007-June (Reviewed 2012-Jan)   |
| 160 | L | Société canadienne de pédiatrie | La transition des jeunes ayant des besoins particuliers vers les soins pour adultes                                                                                                                           | 2007-nov (Reviewed 2012-janv)   |
| 161 | L | Société canadienne de pédiatrie | Les jeunes et les armes à feu au Canada                                                                                                                                                                       | 2005-oct (Reviewed 2012-janv)   |
| 162 | U | Canadian Paediatric Society     | Use of anencephalic newborns as organ donors                                                                                                                                                                  | 2005-July (Reviewed 2012-Jan)   |
| 163 | L | Société canadienne de pédiatrie | Le recours aux nouveau-nés anencéphales comme donneurs d'organes                                                                                                                                              | 2005-juill (Reviewed 2012-janv) |
| 164 | L | Société canadienne de pédiatrie | Les normes de santé pour les jeunes en établissement de détention                                                                                                                                             | 2005-mai (Reviewed 2012-janv)   |
| 165 | Y | Canadian Paediatric Society     | Youth and firearms in Canada                                                                                                                                                                                  | 2005-Oct (Reviewed 2012-Jan)    |
| 166 | T | Canadian Paediatric Society     | Transition to adult care for youth with special health care needs                                                                                                                                             | 2007-Nov (Reviewed 2012-Jan)    |
| 167 | L | Société canadienne de pédiatrie | Les politiques d'exclusion des garderies et des écoles en cas de varicelle : une démarche rationnelle                                                                                                         | 1999-mai (Reviewed 2012-janv)   |
| 168 | C | Canadian Paediatric Society     | Chiropractic care for children : controverses and issues                                                                                                                                                      | 2002-Feb (Reviewed 2012-Jan)    |
| 169 | D | Société canadienne de pédiatrie | Des directives pour les professionnels de la santé qui soutiennent des familles après un décès périnatal                                                                                                      | 2001-sept (Reviewed 2012-janv)  |

|     |   |                                                     |                                                                                                               |                                |
|-----|---|-----------------------------------------------------|---------------------------------------------------------------------------------------------------------------|--------------------------------|
| 170 | H | Canadian Paediatric Society                         | Guidelines for health care professionals supporting families experiencing a perinatal loss                    | 2001-Sept (Reviewed 2012-Jan)  |
| 171 | S | Canadian Paediatric Society                         | School and daycare exclusion policies for chickenpox: a rational approach                                     | 1999-May (Reviewed 2012-Jan)   |
| 172 | L | Société canadienne de pédiatrie                     | Les soins chiropratiques aux enfants : des controverses et des points litigieux                               | 2002-fév (Reviewed 2012-janv)  |
| 173 | L | Société canadienne de pédiatrie                     | L'apprentissage de la propreté : des conseils axés sur l'enfant                                               | 2000-sept (Reviewed 2012-janv) |
| 174 | T | Canadian Paediatric Society                         | Toilet learning : anticipatory guidance with a child-oriented approach                                        | 2000-Sept (Reviewed 2012-Jan)  |
| 175 | L | Société canadienne de pédiatrie                     | Les régimes à l'adolescence                                                                                   | 2004-sept (Reviewed 2012-janv) |
| 176 | D | Canadian Paediatric Society                         | Dieting in adolescence                                                                                        | 2004-Sept (Reviewed 2012-Jan)  |
| 177 | D | Société canadienne de pédiatrie                     | Des recommandations pour créer des environnements de sommeil sécuritaires pour les nourrissons et les enfants | 2004-nov (Reviewed 2012-janv)  |
| 178 | R | Canadian Paediatric Society                         | Recommendations for safe sleeping environments for infants and children                                       | 2004-Nov (Reviewed 2012-Jan)   |
| 179 | D | Société canadienne de pédiatrie                     | Des lignes directrices pour le dépistage des nouveau-nés vulnérables à l'hypoglycémie                         | 2004-déc (Reviewed 2012-janv)  |
| 180 | S | Canadian Paediatric Society                         | Screening guidelines for newborns at risk for low blood glucose                                               | 2004-Dec (Reviewed 2012-Jan)   |
| 181 | A | Canadian Paediatric Society                         | Assessment of babies for car seat safety before hospital discharge                                            | 2000-Jan (Reviewed 2012-Jan)   |
| 182 | E | Société canadienne de pédiatrie                     | Évaluation de la sécurité des bébés dans leur siège d'auto avant leur congé de l'hôpital                      | 2000-janv (Reviewed 2012-janv) |
| 183 | L | Société canadienne de pédiatrie                     | L'administration systématique de vitamine K aux nouveau-nés                                                   | 1997-nov (Reviewed 2012-janv)  |
| 184 | R | Canadian Paediatric Society                         | Routine administration of vitamin K to newborns                                                               | 1997-Nov (Reviewed 2012-Jan)   |
| 185 | L | Société canadienne de pédiatrie                     | La prévention des blessures en ski et en planche à neige                                                      | 2012-janv                      |
| 186 | L | Société canadienne de pédiatrie                     | L'évaluation et la prise en charge des enfants et des adolescents victimes d'une commotion liée à un sport    | 2012-janv                      |
| 187 | R | Société des obstétriciens et gynécologues du Canada | Report de la grossesse                                                                                        | 2012-janv                      |

|     |   |                                                                  |                                                                                                                                        |                               |
|-----|---|------------------------------------------------------------------|----------------------------------------------------------------------------------------------------------------------------------------|-------------------------------|
| 188 | C | Canadian Association of Gastroenterology                         | Canadian Association of Gastroenterology consensus guidelines on safety and quality indicators in endoscopy                            | 2012-Jan                      |
| 189 | C | Guidelines and Protocols Advisory Committee (BC)                 | Cobalamin (vitamin B12) deficiency - Investigation & management                                                                        | 2012-Jan                      |
| 190 | D | Society of Obstetricians and Gynaecologists of Canada            | Delayed child-bearing                                                                                                                  | 2012-Jan                      |
| 191 | E | Canadian Paediatric Society                                      | Evaluation and management of children and adolescents with sports-related concussion                                                   | 2012-Jan                      |
| 192 | F | Guidelines and Protocols Advisory Committee (BC)                 | Folate deficiency - Investigation & management                                                                                         | 2012-Jan                      |
| 193 | M | Saskatchewan Cancer Agency                                       | Myelodysplastic syndrome treatment guidelines                                                                                          | 2012-Jan                      |
| 194 | S | Canadian Paediatric Society                                      | Skiing and snowboarding injury prevention                                                                                              | 2012-Jan                      |
| 195 | S | Alberta Health Services - Cancer Care                            | Superior sulcus (pancoast) tumours                                                                                                     | 2012-Jan                      |
| 196 | V | Guidelines and Protocols Advisory Committee (BC)                 | Viral hepatitis testing                                                                                                                | 2012-Jan                      |
| 197 | L | Société canadienne de pédiatrie                                  | La prise en charge courante de l'infection au virus de l'herpès simplex chez les femmes enceintes et leur nouveau-né                   | 2006-août (Reviewed 2012-fév) |
| 198 | P | Alberta Health Services - Cancer Care                            | Penile cancer                                                                                                                          | 2011-Jan (Reviewed 2012-Feb)  |
| 199 | P | Cancer Care Ontario's Program in Evidence-based Care             | PET imaging in head and neck cancer                                                                                                    | 2009-Jan (Reviewed 2012-Feb)  |
| 200 | H | Ontario Association of Medical Laboratories                      | Guidelines for the use of serum tests for iron deficiency                                                                              | 1995-Apr (Reviewed 2012-Feb)  |
| 201 | I | Société canadienne de pédiatrie                                  | Interdire aux enfants et aux adolescents de moins de 18 ans l'accès aux établissements commerciaux de bronzage                         | 2012-fév                      |
| 202 | L | Société canadienne de pédiatrie                                  | La prévention de l'étouffement et de la suffocation chez les enfants                                                                   | 2012-fév                      |
| 203 | L | Ordre des psychologues du Québec; Collège des médecins du Québec | Les troubles du spectre de l'autisme - l'évaluation clinique                                                                           | 2012-fév                      |
| 204 | R | Programme éducatif canadien sur l'hypertension                   | Recommandation 2012 du PECH - Prise en charge de l'hypertension artérielle                                                             | 2012-fév                      |
| 205 | F | Cancer Care Ontario's Program in Evidence-based Care             | Follow-up care, surveillance protocol, and secondary prevention measures for survivors of colorectal cancer: Guideline recommendations | 2012-Feb-3                    |

|     |     |                                         |                                                                                                                                                          |                                |
|-----|-----|-----------------------------------------|----------------------------------------------------------------------------------------------------------------------------------------------------------|--------------------------------|
| 206 | 0-9 | Canadian Hypertension Education Program | 2012 CHEP recommendations for management of hypertension                                                                                                 | 2012-Feb                       |
| 207 | B   | Canadian Paediatric Society             | Banning children and youth under the age of 18 years from commercial tanning facilities                                                                  | 2012-Feb                       |
| 208 | C   | Canadian Headache Society               | Canadian Headache Society guideline for migraine prophylaxis                                                                                             | 2012-Feb                       |
| 209 | C   | Canadian Headache Society               | Canadian Headache Society guideline for migraine prophylaxis : Introduction to the guideline, and general principles of migraine prophylaxis - Section I | 2012-Feb                       |
| 210 | C   | Canadian Headache Society               | Canadian Headache Society guideline for migraine prophylaxis: Systematic review: Medications for migraine prophylaxis - Section II                       | 2012-Feb                       |
| 211 | C   | Canadian Headache Society               | Canadian Headache Society guideline for migraine prophylaxis: Treatment strategies: pharmacological prophylaxis - Section III                            | 2012-Feb                       |
| 212 | P   | Canadian Paediatric Society             | Preventing choking and suffocation in children                                                                                                           | 2012-Feb                       |
| 213 | L   | Société canadienne de pédiatrie         | Le syndrome d'alcoolisme foetal                                                                                                                          | 2002-mars (Reviewed 2012-mars) |
| 214 | F   | Canadian Paediatric Society             | Fetal alcohol syndrome                                                                                                                                   | 2002-Mar (Reviewed 2012-Mar)   |
| 215 | L   | Association dentaire canadienne         | L'utilisation des fluorures pour la prévention des caries                                                                                                | 2003-mars (Reviewed 2012-mars) |
| 216 | U   | Canadian Dental Association             | Use of fluorides in caries prevention                                                                                                                    | 2003-Mar (Reviewed 2012-Mar)   |
| 217 | L   | Société canadienne de pédiatrie         | Les suppléments de vitamine D: recommandations pour les mères et leur nourrisson au Canada                                                               | 2007-sept (Reviewed 2012-mars) |
| 218 | V   | Canadian Paediatric Society             | Vitamin D supplementation: recommendations for Canadian mothers and infants                                                                              | 2007-Sept (Reviewed 2012-Mar)  |
| 219 | D   | Société canadienne de pédiatrie         | Des recommandations pour le traitement néonatal par surfactant exogène: Addenda 2012                                                                     | 2005-fév (Reviewed 2012-mars)  |
| 220 | R   | Canadian Paediatric Society             | Recommendations for neonatal surfactant therapy: Addendum 2012                                                                                           | 2005-Feb (Reviewed 2012-Mar)   |
| 221 | L   | Société canadienne de pédiatrie         | La réduction du risque de diabète de type 2 chez les enfants autochtones du Canada                                                                       | 2005-janv (Reviewed 2012-mars) |

|     |   |                                                     |                                                                                                                                                                                            |                               |
|-----|---|-----------------------------------------------------|--------------------------------------------------------------------------------------------------------------------------------------------------------------------------------------------|-------------------------------|
| 222 | R | Canadian Paediatric Society                         | Risk reduction for type 2 diabetes in Aboriginal children in Canada                                                                                                                        | 2005-Jan (Reviewed 2012-Mar)  |
| 223 | A | Alberta Health Services - Cancer Care               | Adjuvant interferon for malignant melanoma                                                                                                                                                 | 2007-May (Reviewed 2012-Mar)  |
| 224 | O | Alberta Health Services - Cancer Care               | Optimal excision margins for primary cutaneous melanoma                                                                                                                                    | 2011-Feb (Reviewed 2012-Mar)  |
| 225 | R | Alberta Health Services - Cancer Care               | Regional node dissection in primary cutaneous melanoma                                                                                                                                     | 2011-Feb (Reviewed 2012-Mar)  |
| 226 | P | Alberta Health Services - Cancer Care               | Preoperative and pretreatment investigations for malignant melanoma                                                                                                                        | 2009-June (Reviewed 2012-Mar) |
| 227 | A | Alberta Health Services - Cancer Care               | Adjuvant radiation for malignant melanoma                                                                                                                                                  | 2008-May (Reviewed 2012-Mar)  |
| 228 | B | Alberta Health Services - Cancer Care               | Biopsy of a suspicious pigmented lesion                                                                                                                                                    | 2008-May (Reviewed 2012-Mar)  |
| 229 | D | Société canadienne de physiologie de l'exercice     | Directives canadiennes en matière d'activité physique pour la petite enfance (enfants âgés de 0 à 4 ans)                                                                                   | 2012-mars                     |
| 230 | D | Société canadienne de physiologie de l'exercice     | Directives canadiennes en matière de comportement sédentaire pour la petite enfance (enfants âgés de 0 à 4 ans)                                                                            | 2012-mars                     |
| 231 | F | Société des obstétriciens et gynécologues du Canada | Facteurs génétiques à prendre en considération dans le cadre de l'examen gynécologique annuel                                                                                              | 2012-mars                     |
| 232 | L | Société canadienne de pédiatrie                     | Les aspects psychosociaux de l'obésité chez les enfants et les adolescents                                                                                                                 | 2012-mars                     |
| 233 | P | Société des obstétriciens et gynécologues du Canada | Prise en charge de l'infection à la varicelle pendant la grossesse                                                                                                                         | 2012-mars                     |
| 234 | U | Société canadienne de pédiatrie                     | Une vie saine et active : des directives en matière d'activité physique chez les enfants et les adolescents                                                                                | 2012-mars                     |
| 235 | B | Saskatchewan Cancer Agency                          | Breast cancer treatment guidelines                                                                                                                                                         | 2012-Mar                      |
| 236 | C | Canadian Cardiovascular Society                     | Canadian Cardiovascular Society focused position statement update on assessment of the cardiac patient for fitness to drive: Fitness following left ventricular assist device implantation | 2012-Mar                      |



|     |   |                                                                                                     |                                                                                                                                                                                                                                                |          |
|-----|---|-----------------------------------------------------------------------------------------------------|------------------------------------------------------------------------------------------------------------------------------------------------------------------------------------------------------------------------------------------------|----------|
| 237 | C | Canadian Cardiovascular Society; Canadian Anesthesiologists' Society; Canadian Heart Rhythm Society | Canadian Cardiovascular Society/Canadian Anesthesiologists' Society/Canadian Heart Rhythm Society joint position statement on the perioperative management of patients with implanted pacemakers, defibrillators, and neurostimulating devices | 2012-Mar |
| 238 | C | Canadian Consensus Group on the Management of Tic Disorder                                          | Canadian guidelines for the evidence-based treatment of tic disorders: Behavioural therapy, deep brain stimulation, and transcranial magnetic stimulation                                                                                      | 2012-Mar |
| 239 | C | Canadian Consensus Group on the Management of Tic Disorder                                          | Canadian guidelines for the evidence-based treatment of tic disorders: Pharmacotherapy                                                                                                                                                         | 2012-Mar |
| 240 | C | Canadian Society for Exercise Physiology                                                            | Canadian physical activity guidelines for the early years (aged 0–4 year)                                                                                                                                                                      | 2012-Mar |
| 241 | C | Canadian Society for Exercise Physiology                                                            | Canadian sedentary behaviour guidelines for the early years (aged 0–4 years)                                                                                                                                                                   | 2012-Mar |
| 242 | F | Canadian Cardiovascular Society                                                                     | Focused 2012 update of the Canadian Cardiovascular Society atrial fibrillation guidelines: Recommendations for stroke prevention and rate / rhythm control                                                                                     | 2012-Mar |
| 243 | H | Society of Obstetricians and Gynaecologists of Canada                                               | Genetic considerations for a woman's annual gynaecological examination                                                                                                                                                                         | 2012-Mar |
| 244 | M | Canadian Cardiovascular Society; Canadian Pain Society                                              | Management of patients with refractory angina: Canadian Cardiovascular Society/Canadian Pain Society joint guidelines                                                                                                                          | 2012-Mar |
| 245 | M | Society of Obstetricians and Gynaecologists of Canada                                               | Management of varicella infection (Chickenpox) in pregnancy                                                                                                                                                                                    | 2012-Mar |
| 246 | P | Canadian Paediatric Society                                                                         | Psychosocial aspects of child and adolescent obesity                                                                                                                                                                                           | 2012-Mar |
| 247 | S | Alberta Health Services - Cancer Care                                                               | Systemic therapy for unresectable stage III or metastatic cutaneous melanoma                                                                                                                                                                   | 2012-Mar |
| 248 | T | Cancer Care Ontario's Program in Evidence-based Care                                                | The role of endolaryngeal surgery (with or without laser) versus radiotherapy in the management of early (T1) glottic cancer                                                                                                                   | 2012-Mar |

|     |   |                                                       |                                                                                                                                   |                               |
|-----|---|-------------------------------------------------------|-----------------------------------------------------------------------------------------------------------------------------------|-------------------------------|
| 249 | A | Alberta Health Services - Cancer Care                 | Adjuvant radiation therapy for invasive breast cancer                                                                             | 2008-June (Reviewed 2012-Apr) |
| 250 | C | Alberta Health Services - Cancer Care                 | Cancer of the uterine cervix                                                                                                      | 2009-Oct (Reviewed 2012-Apr)  |
| 251 | E | Alberta Health Services - Cancer Care                 | Endometrial cancer                                                                                                                | 2009-Nov (Reviewed 2012-Apr)  |
| 252 | O | Alberta Health Services - Cancer Care                 | Ovarian germ cell tumours                                                                                                         | 2010-June (Reviewed 2012-Apr) |
| 253 | E | Alberta Health Services - Cancer Care                 | Epithelial ovarian, fallopian tube and primary peritoneal cancer                                                                  | 2010-July (Reviewed 2012-Apr) |
| 254 | A | Société des obstétriciens et gynécologues du Canada   | Antibioprophylaxie dans le cadre d'interventions gynécologiques                                                                   | 2012-avril                    |
| 255 | H | Société canadienne d'ophtalmologie                    | Guide de pratique clinique factuelle de la Société canadienne d'ophtalmologie pour la gestion de la rétinopathie diabétique       | 2012-avril                    |
| 256 | A | Canadian Thoracic Society                             | Alpha-1 antitrypsin deficiency targeted testing and augmentation therapy: A Canadian Thoracic Society clinical practice guideline | 2012-Apr                      |
| 257 | A | Society of Obstetricians and Gynaecologists of Canada | Antibiotic prophylaxis in gynaecologic procedures                                                                                 | 2012-Apr                      |
| 258 | C | Canadian Ophthalmological Society                     | Canadian Ophthalmological Society evidence-based clinical practice guidelines for the management of diabetic retinopathy          | 2012-Apr                      |
| 259 | C | Canadian Thoracic Society                             | Canadian Thoracic Society 2012 guideline update: Diagnosis and management of asthma in preschoolers, children and adults          | 2012-Apr                      |
| 260 | M | Cardiometabolic Risk Working Group                    | Managing cardiometabolic risk in primary care - Summary of the 2011 consensus statement                                           | 2012-Apr                      |
| 261 | N | Alberta Health Services - Cancer Care                 | Non-small cell lung cancer - stage III                                                                                            | 2012-Apr                      |
| 262 | R | Alberta Health Services - Cancer Care                 | Renal cell carcinoma                                                                                                              | 2005-Apr (Reviewed 2012-May)  |
| 263 | L | Alberta Health Services - Cancer Care                 | Low-grade astrocytomas and oligodendrogliomas                                                                                     | 2008-July (Reviewed 2012-May) |
| 264 | B | Perinatal Services BC                                 | Breastfeeding healthy term infants                                                                                                | 2012-May                      |
| 265 | C | Cancer Care Ontario's Program in Evidence-based Care  | Cervical screening: A guideline for clinical practice in Ontario                                                                  | 2012-May                      |
| 266 | C | Society of Obstetricians and Gynaecologists of Canada | Counselling considerations for prenatal genetic screening                                                                         | 2012-May                      |

|     |   |                                                       |                                                                                                                                                                               |           |
|-----|---|-------------------------------------------------------|-------------------------------------------------------------------------------------------------------------------------------------------------------------------------------|-----------|
| 267 | E | Canadian Pain Society                                 | Evidence-based guideline for neuropathic pain interventional treatments: Spinal cord stimulation, intravenous infusions, epidural injections and nerve blocks - Abstract only | 2012-May  |
| 268 | H | Canadian Paediatric Society                           | Gambling in children and adolescents                                                                                                                                          | 2012-May  |
| 269 | L | Cancer Care Ontario's Program in Evidence-based Care  | Lenalidomide in multiple myeloma                                                                                                                                              | 2012-May  |
| 270 | M | Society of Obstetricians and Gynaecologists of Canada | Management of group B streptococcal bacteriuria in pregnancy                                                                                                                  | 2012-May  |
| 271 | M | Canadian Paediatric Society                           | Managing the paediatric patient with an acute asthma exacerbation                                                                                                             | 2012-May  |
| 272 | R | Cancer Care Ontario's Program in Evidence-based Care  | Referral of patients with suspected colorectal cancer by family physicians and other primary care providers                                                                   | 2012-May  |
| 273 | R | Cancer Care Ontario's Program in Evidence-based Care  | Risk reduction of prostate cancer with drugs or nutritional supplements                                                                                                       | 2012-May  |
| 274 | T | Canadian Hypertension Education Program               | The 2012 Canadian Hypertension Education Program recommendations for the management of hypertension: Blood pressure measurement, diagnosis, assessment of risk, and therapy   | 2012-May  |
| 275 | F | Société des obstétriciens et gynécologues du Canada   | Facteurs liés au counseling à prendre en considération dans le cadre du dépistage génétique prénatal                                                                          | 2012-mai  |
| 276 | L | Société canadienne de pédiatrie                       | La prise en charge du patient pédiatrique présentant une exacerbation aiguë de l'asthme                                                                                       | 2012-mai  |
| 277 | L | Société canadienne de pédiatrie                       | Les jeux de hasard chez les enfants et les adolescents                                                                                                                        | 2012-mai  |
| 278 | P | Société des obstétriciens et gynécologues du Canada   | Prise en charge de la bactériurie à streptocoques du groupe B pendant la grossesse                                                                                            | 2012-mai  |
| 279 | L | Société canadienne de pédiatrie                       | L'Initiative Amis des bébés : protéger promouvoir et soutenir l'allaitement                                                                                                   | 2012-juin |
| 280 | L | Société canadienne de pédiatrie                       | La prévention des blessures dans les terrains de jeux                                                                                                                         | 2012-juin |
| 281 | L | Société des obstétriciens et gynécologues du Canada   | Lignes directrices canadiennes en matière de planification de la grossesse en présence du VIH                                                                                 | 2012-juin |

|     |   |                                                                             |                                                                                                                                                                             |                                 |
|-----|---|-----------------------------------------------------------------------------|-----------------------------------------------------------------------------------------------------------------------------------------------------------------------------|---------------------------------|
| 282 | A | Alberta Health Services - Cancer Care                                       | Adjuvant radiation therapy for ductal carcinoma in situ                                                                                                                     | 2008-June (Reviewed 2012-June)  |
| 283 | C | Canadian Agency for Drugs and Technologies in Health                        | CADTH therapeutic review recommendations: new oral anticoagulants for the prevention of thromboembolic events in patients with atrial fibrillation                          | 2012-June                       |
| 284 | C | Canadian Expert Panel on the Management of Age-related Macular Degeneration | Canadian expert consensus: optimal treatment of neovascular age-related macular degeneration                                                                                | 2012-June                       |
| 285 | C | Society of Obstetricians and Gynaecologists of Canada                       | Canadian HIV pregnancy planning guidelines                                                                                                                                  | 2012-June                       |
| 286 | M | Alberta Health Services - Cancer Care                                       | Meningiomas                                                                                                                                                                 | 2012-June                       |
| 287 | P | Canadian Paediatric Society                                                 | Preventing playground injuries                                                                                                                                              | 2012-June                       |
| 288 | T | Canadian Paediatric Society                                                 | The Baby-friendly Initiative: Protecting, promoting and supporting breastfeeding                                                                                            | 2012-June                       |
| 289 | T | Cancer Care Ontario's Program in Evidence-based Care                        | The role of liver resection in colorectal cancer metastases                                                                                                                 | 2012-June                       |
| 290 | T | Canadian Cardiovascular Society                                             | Transcatheter aortic valve implantation: A Canadian Cardiovascular Society position statement                                                                               | 2012-June                       |
| 291 | L | Société canadienne de pédiatrie                                             | Les produits antimicrobiens à domicile : le problème de l'antibiorésistance                                                                                                 | 2006-mars (Reviewed 2012-juill) |
| 292 | S | Alberta Health Services - Cancer Care                                       | Staging investigations for asymptomatic and newly diagnosed breast cancer                                                                                                   | 2011-Apr (Reviewed 2012-July)   |
| 293 | A | Canadian Association for the Study of the Liver                             | An update on the management of chronic hepatitis C: Consensus guidelines from the Canadian Association for the Study of the Liver                                           | 2012-July                       |
| 294 | C | Parkinson Society Canada                                                    | Canadian guidelines on Parkinson's disease                                                                                                                                  | 2012-July                       |
| 295 | C | Cancer Care Ontario's Program in Evidence-based Care                        | Chemotherapy (i.e., Gemcitabine, Docetaxel Plus Gemcitabine, Doxorubicin, or Trabectedin) for inoperable, locally advanced, recurrent, or metastatic uterine leiomyosarcoma | 2012-July                       |
| 296 | H | Toward Optimized Practice [Alberta]                                         | Guideline for primary care management of headache in adults                                                                                                                 | 2012-July                       |

|     |     |                                                       |                                                                                                                                                                                                  |                               |
|-----|-----|-------------------------------------------------------|--------------------------------------------------------------------------------------------------------------------------------------------------------------------------------------------------|-------------------------------|
| 297 | I   | College of Dental Surgeons of British Columbia        | Infection prevention and control guidelines                                                                                                                                                      | 2012-July                     |
| 298 | L   | Société Parkinson Canada                              | Lignes directrices canadiennes sur la maladie de Parkinson                                                                                                                                       | 2012-juill                    |
| 299 | C   | Canadian Rheumatology Association                     | Canadian Rheumatology Association recommendations for the pharmacological management of rheumatoid arthritis with traditional and biologic disease-modifying antirheumatic drugs: Part II Safety | 2012-Aug                      |
| 300 | F   | Society of Obstetricians and Gynaecologists of Canada | Female sexual health consensus clinical guidelines                                                                                                                                               | 2012-Aug                      |
| 301 | P   | Alberta Health Services - Cancer Care                 | Pituitary adenomas                                                                                                                                                                               | 2012-Aug                      |
| 302 | E   | Society of Obstetricians and Gynaecologists of Canada | Emergency contraception                                                                                                                                                                          | 2003-Aug (Reviewed 2012-Sept) |
| 303 | R   | Guidelines and Protocols Advisory Committee (BC)      | Rheumatoid arthritis: Diagnosis, management and monitoring                                                                                                                                       | 2012-Sept-30                  |
| 304 | 0-9 | Canadian Association of Radiologists                  | 2012 CAR diagnostic imaging referral guidelines - Section A: Central nervous system                                                                                                              | 2012-Sept                     |
| 305 | 0-9 | Canadian Association of Radiologists                  | 2012 CAR diagnostic imaging referral guidelines - Section B: Head and neck                                                                                                                       | 2012-Sept                     |
| 306 | 0-9 | Canadian Association of Radiologists                  | 2012 CAR diagnostic imaging referral guidelines - Section C: Spine                                                                                                                               | 2012-Sept                     |
| 307 | 0-9 | Canadian Association of Radiologists                  | 2012 CAR diagnostic imaging referral guidelines - Section D: Musculoskeletal system                                                                                                              | 2012-Sept                     |
| 308 | 0-9 | Canadian Association of Radiologists                  | 2012 CAR diagnostic imaging referral guidelines - Section E: Cardiovascular                                                                                                                      | 2012-Sept                     |
| 309 | 0-9 | Canadian Association of Radiologists                  | 2012 CAR diagnostic imaging referral guidelines - Section F: Thoracic                                                                                                                            | 2012-Sept                     |
| 310 | 0-9 | Canadian Association of Radiologists                  | 2012 CAR diagnostic imaging referral guidelines - Section G: Gastrointestinal system                                                                                                             | 2012-Sept                     |
| 311 | 0-9 | Canadian Association of Radiologists                  | 2012 CAR diagnostic imaging referral guidelines - Section I: Obstetrics and gynaecology                                                                                                          | 2012-Sept                     |
| 312 | 0-9 | Canadian Association of Radiologists                  | 2012 CAR diagnostic imaging referral guidelines - Section L: Pediatrics                                                                                                                          | 2012-Sept                     |

|     |   |                                                                                                              |                                                                                                                                                                                                                                            |           |
|-----|---|--------------------------------------------------------------------------------------------------------------|--------------------------------------------------------------------------------------------------------------------------------------------------------------------------------------------------------------------------------------------|-----------|
| 313 | C | Heart and Stroke Foundation of Canada; Canadian Stroke Network                                               | Canadian best practice recommendations for stroke care : chapter 2. stroke prevention                                                                                                                                                      | 2012-Sept |
| 314 | L | Collège des médecins du Québec                                                                               | L'interruption volontaire de grossesse                                                                                                                                                                                                     | 2012-sept |
| 315 | L | Les diététistes du Canada; Santé Canada; Breastfeeding Committee for Canada; Société canadienne de pédiatrie | La nutrition du nourrisson né à terme et en santé – Recommandations de la naissance à six mois: Énoncé conjoint de Santé Canada, de la Société canadienne de pédiatrie, des Diététistes du Canada et du Comité canadien pour l'allaitement | 2012-sept |
| 316 | L | Société canadienne de pédiatrie                                                                              | La prévention des blessures non intentionnelles chez les enfants et adolescents autochtones au Canada                                                                                                                                      | 2012-sept |
| 317 | L | Association canadienne des radiologistes                                                                     | Lignes directrices pour les examens d'imagerie diagnostique de la CAR 2012 - Section A : Système nerveux central                                                                                                                           | 2012-sept |
| 318 | L | Association canadienne des radiologistes                                                                     | Lignes directrices pour les examens d'imagerie diagnostique de la CAR 2012 - Section B : Tête et cou                                                                                                                                       | 2012-sept |
| 319 | L | Association canadienne des radiologistes                                                                     | Lignes directrices pour les examens d'imagerie diagnostique de la CAR 2012 - Section C : Rachis                                                                                                                                            | 2012-sept |
| 320 | L | Association canadienne des radiologistes                                                                     | Lignes directrices pour les examens d'imagerie diagnostique de la CAR 2012 - Section D : Système musculosquelettique                                                                                                                       | 2012-sept |
| 321 | L | Association canadienne des radiologistes                                                                     | Lignes directrices pour les examens d'imagerie diagnostique de la CAR 2012 - Section E : Système cardiovasculaire                                                                                                                          | 2012-sept |
| 322 | L | Association canadienne des radiologistes                                                                     | Lignes directrices pour les examens d'imagerie diagnostique de la CAR 2012 - Section F : Thorax                                                                                                                                            | 2012-sept |
| 323 | L | Association canadienne des radiologistes                                                                     | Lignes directrices pour les examens d'imagerie diagnostique de la CAR 2012 - Section G : Système gastro-intestinal                                                                                                                         | 2012-sept |

|     |     |                                                                                                      |                                                                                                                                                                                                            |                                |
|-----|-----|------------------------------------------------------------------------------------------------------|------------------------------------------------------------------------------------------------------------------------------------------------------------------------------------------------------------|--------------------------------|
| 324 | L   | Association canadienne des radiologistes                                                             | Lignes directrices pour les examens d'imagerie diagnostique de la CAR 2012 - Section I : Obstétrique et gynécologie                                                                                        | 2012-sept                      |
| 325 | L   | Association canadienne des radiologistes                                                             | Lignes directrices pour les examens d'imagerie diagnostique de la CAR 2012 - Section L : Pédiatrie                                                                                                         | 2012-sept                      |
| 326 | N   | Dietitians of Canada; Health Canada; Breastfeeding Committee for Canada; Canadian Paediatric Society | Nutrition for healthy term infants: Recommendations for birth to six months: A joint statement of Health Canada, Canadian Paediatric Society, Dietitians of Canada, and Breastfeeding Committee for Canada | 2012-Sept                      |
| 327 | P   | Canadian Paediatric Society                                                                          | Preventing unintentional injuries in Indigenous children and youth in Canada                                                                                                                               | 2012-Sept                      |
| 328 | C   | Société des obstétriciens et gynécologues du Canada                                                  | Contraception d'urgence                                                                                                                                                                                    | 2003-août (Reviewed 2012-sept) |
| 329 | O   | Guidelines and Protocols Advisory Committee (BC)                                                     | Osteoporosis: Diagnosis, treatment and fracture prevention                                                                                                                                                 | 2011-May (Reviewed 2012-Oct)   |
| 330 | R   | Canadian Task Force on Preventive Health Care                                                        | Recommendations on screening for type 2 diabetes in adults                                                                                                                                                 | 2012-Oct-16                    |
| 331 | 0-9 | Canadian Urological Association                                                                      | 2012 update: Guidelines for adult urinary incontinence collaborative consensus document for the Canadian Urological Association                                                                            | 2012-Oct                       |
| 332 | C   | Société des obstétriciens et gynécologues du Canada                                                  | Classification des césariennes au Canada : Les critères modifiés de Robson                                                                                                                                 | 2012-oct                       |
| 333 | C   | Society of Obstetricians and Gynaecologists of Canada                                                | Classification of Caesarean sections in Canada: The modified Robson criteria                                                                                                                               | 2012-Oct                       |
| 334 | C   | Canadian Paediatric Society                                                                          | Counselling and management for anticipated extremely preterm birth                                                                                                                                         | 2012-Oct                       |
| 335 | H   | Toward Optimized Practice [Alberta]                                                                  | Guideline for vitamin D testing and supplementation in adults                                                                                                                                              | 2012-Oct                       |
| 336 | L   | Société canadienne de pédiatrie                                                                      | Les conseils et la prise en charge en prévision d'une très grande prématurité                                                                                                                              | 2012-oct                       |
| 337 | M   | Cancer Care Ontario's Program in Evidence-based Care                                                 | Models of care for cancer survivorship                                                                                                                                                                     | 2012-Oct                       |

|     |   |                                                                                                                                                                                                                                            |                                                                                                                               |            |
|-----|---|--------------------------------------------------------------------------------------------------------------------------------------------------------------------------------------------------------------------------------------------|-------------------------------------------------------------------------------------------------------------------------------|------------|
| 338 | R | College of Family Physicians of Canada; Canadian Association of Perinatal, Women's Health Nurses; Canadian Association of Midwives; Society of Rural Physicians of Canada; Society of Obstetricians and Gynaecologists of Canada           | Rural maternity care                                                                                                          | 2012-Oct   |
| 339 | S | Collège des médecins de famille du Canada; Canadian Association of Perinatal, Women's Health Nurses; Association canadienne des sages-femmes; Société de la médecine rurale du Canada; Société des obstétriciens et gynécologues du Canada | Soins de maternité en région rurale                                                                                           | 2012-oct   |
| 340 | B | Canadian Paediatric Society                                                                                                                                                                                                                | Bodychecking in youth ice hockey                                                                                              | 2012-Nov   |
| 341 | C | Public Health Agency of Canada                                                                                                                                                                                                             | Canadian immunization guide : part 4. Active immunizing agents - Bacille Calmette-Guérin (BCG) Vaccine                        | 2012-Nov   |
| 342 | D | Canadian Medical Association                                                                                                                                                                                                               | Determining medical fitness to operate motor vehicles : CMA driver's guide                                                    | 2012-Nov   |
| 343 | E | Canadian Association of Gastroenterology                                                                                                                                                                                                   | Evaluation and management of skeletal health in celiac disease: position statement - abstract only                            | 2012-Nov   |
| 344 | H | Ontario Association of Medical Laboratories                                                                                                                                                                                                | Guidelines for the use of laboratory tests for assessment of iron overload                                                    | 2012-Nov   |
| 345 | N | Provincial Council for Maternal and Child Health (Ontario)                                                                                                                                                                                 | Neonatal abstinence syndrome clinical practice guidelines for Ontario                                                         | 2012-Nov   |
| 346 | S | Cancer Care Ontario's Program in Evidence-based Care                                                                                                                                                                                       | Surgical management of patients with lymph node metastases from cutaneous melanoma of the trunk or extremities                | 2012-Dec-5 |
| 347 | L | Société canadienne de pédiatrie                                                                                                                                                                                                            | L'administration postnatale de corticoïdes pour traiter ou prévenir les affections pulmonaires chroniques chez les prématurés | 2012-déc   |



|     |   |                                                                                    |                                                                                                                                |          |
|-----|---|------------------------------------------------------------------------------------|--------------------------------------------------------------------------------------------------------------------------------|----------|
| 348 | A | Canadian Association of Psychosocial Oncology; Canadian Partnership Against Cancer | A pan-Canadian practice guideline: prevention, screening, assessment and treatment of sleep disturbances in adults with cancer | 2012-Dec |
| 349 | M | Canadian Association for the Study of the Liver                                    | Management of chronic hepatitis B: Consensus guidelines                                                                        | 2012-Dec |
| 350 | P | Canadian Paediatric Society                                                        | Postnatal corticosteroids to treat or prevent chronic lung disease in preterm infants                                          | 2012-Dec |
| 351 | P | Canadian Association of Psychosocial Oncology; Canadian Partnership Against Cancer | Psychosocial health care needs assessment of adult cancer patients: a consensus-based guideline                                | 2012-Dec |
| 352 | R | Canadian Consensus Conference on the Diagnosis and Treatment of Dementia           | Recommendations of the 4th Canadian Consensus Conference on the Diagnosis and Treatment of Dementia (CCCDTD4)                  | 2012-Dec |
| 353 | S | Cancer Care Ontario's Program in Evidence-based Care                               | Stem cell transplantation in lymphoma                                                                                          | 2012-Dec |
| 354 | A | Alberta Health Services - Cancer Care                                              | Alberta bone marrow and blood cell transplant program – Standard practice manual                                               | 2011     |
| 355 | A | Canadian Centre on Substance Abuse                                                 | Alcohol and health in Canada: A summary of evidence and guidelines for low-risk drinking                                       | 2011     |
| 356 | B | Centre for Addiction and Mental Health                                             | Buprenorphine/Naloxone for opioid dependence: Clinical practice guideline                                                      | 2011     |
| 357 | C | Canadian Attention Deficit Hyperactivity Disorder Resource Alliance                | Canadian ADHD practice guidelines, Third Edition                                                                               | 2011     |
| 358 | C | Canadian Society of Nephrology                                                     | Clinical practice guidelines and recommendations on peritoneal dialysis adequacy 2011                                          | 2011     |
| 359 | D | SCI Action Canada                                                                  | Directives en matière d'activité physique chez les adultes ayant une lésion médullaire                                         | 2011     |
| 360 | H | Toward Optimized Practice [Alberta]                                                | Guideline for the evidence-informed primary care management of low back pain, 2nd Edition, 2011                                | 2011     |
| 361 | L | Canadian Attention Deficit Hyperactivity Disorder Resource Alliance                | Lignes directrices canadiennes sur le TDAH - Troisième édition                                                                 | 2011     |
| 362 | N | Canadian Partnership Against Cancer                                                | National colorectal cancer screening network classification of benign polyps                                                   | 2011     |

|     |   |                                                                                   |                                                                                            |                                 |
|-----|---|-----------------------------------------------------------------------------------|--------------------------------------------------------------------------------------------|---------------------------------|
| 363 | P | Rick Hansen Institute; SCI Action Canada                                          | Physical activity guidelines for adults with spinal cord injury                            | 2011                            |
| 364 | P | Saskatchewan Cancer Agency                                                        | Provincial non small cell lung cancer treatment guidelines                                 | 2011                            |
| 365 | P | Saskatchewan Cancer Agency                                                        | Provincial small cell lung cancer treatment guidelines                                     | 2011                            |
| 366 | T | Association of Medical Microbiology and Infectious Disease Canada                 | The use of antiviral drugs for influenza: Guidance for practitioners, 2011-2012            | 2011                            |
| 367 | P | Registered Nurses' Association of Ontario                                         | Promoting continence using prompted voiding                                                | 2002 (Reviewed 2011)            |
| 368 | R | Registered Nurses' Association of Ontario                                         | Risk assessment and prevention of pressure ulcers                                          | 2002 (Reviewed 2011)            |
| 369 | P | Registered Nurses' Association of Ontario                                         | Prevention of constipation in the older adult population                                   | 2005 (Reviewed 2011)            |
| 370 | P | Registered Nurses' Association of Ontario                                         | Prevention of falls and fall injuries in the older adult                                   | 2005 (Reviewed 2011)            |
| 371 | S | Heart and Stroke Foundation of Ontario; Registered Nurses' Association of Ontario | Stroke assessment across the continuum of care                                             | 2005 (Reviewed 2011)            |
| 372 | H | Perinatal Services BC                                                             | Guideline: Prenatal screening on Down Syndrome, trisomy 18, and open neural tube defects   | 2010-Jan (Reviewed 2011)        |
| 373 | R | Registered Nurses' Association of Ontario                                         | Reducing foot complications for people with diabetes                                       | 2004 (Reviewed 2011)            |
| 374 | D | Société canadienne de pédiatrie                                                   | Des directives sur le dépistage génétique des enfants en santé                             | 2003-janv (Reviewed 2011-janv)  |
| 375 | H | Canadian Paediatric Society                                                       | Guidelines for genetic testing of healthy children                                         | 2003-Jan (Reviewed 2011-Jan)    |
| 376 | B | Alberta Health Services - Cancer Care                                             | Bladder cancer                                                                             | 2005-Apr (Reviewed 2011-Jan)    |
| 377 | C | Canadian Paediatric Society                                                       | Children and natural health products : what a clinician should know                        | 2005-Apr (Reviewed 2011-Jan)    |
| 378 | L | Société canadienne de pédiatrie                                                   | Les enfants et les produits de santé naturels : ce que le clinicien devrait savoir         | 2005-avril (Reviewed 2011-janv) |
| 379 | C | Société des obstétriciens et gynécologues du Canada                               | Considérations génétiques pour ce qui est de l'évaluation préconceptionnelle chez la femme | 2011-janv                       |
| 380 | D | Société canadienne de physiologie de l'exercice                                   | Directives canadiennes en matière d'activité physique                                      | 2011-janv                       |
| 381 | L | Société canadienne de pédiatrie                                                   | Le traitement d'urgence de l'anaphylaxie chez les nourrissons et les enfants               | 2011-janv                       |
| 382 | U | Société canadienne de pédiatrie                                                   | Un calendrier de vaccination harmonisé au Canada : un appel à l'action                     | 2011-janv                       |

|     |   |                                                                 |                                                                                                                                                  |                               |
|-----|---|-----------------------------------------------------------------|--------------------------------------------------------------------------------------------------------------------------------------------------|-------------------------------|
| 383 | A | Canadian Paediatric Society                                     | A harmonized immunization schedule for Canada: A call to action                                                                                  | 2011-Jan                      |
| 384 | C | Canadian Society for Exercise Physiology                        | Canadian physical activity guidelines                                                                                                            | 2011-Jan                      |
| 385 | C | Canadian Thoracic Society                                       | Canadian Thoracic Society 2011 guideline update: Diagnosis and treatment of sleep disordered breathing                                           | 2011-Jan                      |
| 386 | C | Guidelines and Protocols Advisory Committee (BC)                | Chronic obstructive pulmonary disease (COPD)                                                                                                     | 2011-Jan                      |
| 387 | E | Canadian Paediatric Society                                     | Emergency treatment of anaphylaxis in infants and children                                                                                       | 2011-Jan                      |
| 388 | H | Society of Obstetricians and Gynaecologists of Canada           | Genetic considerations for a woman's pre-conception evaluation                                                                                   | 2011-Jan                      |
| 389 | I | Expert Panel of Iron Overload in Myelodysplastic Syndromes      | Iron overload in myelodysplastic syndromes: a Canadian consensus guideline                                                                       | 2011-Jan                      |
| 390 | T | Cancer Care Ontario's Program in Evidence-based Care            | The role of IMRT in head & neck cancer                                                                                                           | 2011-Jan                      |
| 391 | T | British Columbia Centre for Excellence in HIV/AIDS              | Therapeutic guidelines: antiretroviral treatment of adult HIV infection                                                                          | 2011-Jan                      |
| 392 | L | American Academy of Pediatrics; Société canadienne de pédiatrie | La prévention et la prise en charge de la douleur chez le nouveau-né : Une mise à jour                                                           | 2007-janv (Reviewed 2011-fév) |
| 393 | U | Société canadienne de pédiatrie                                 | Une discipline efficace auprès des enfants                                                                                                       | 2004-janv (Reviewed 2011-fév) |
| 394 | E | Canadian Paediatric Society                                     | Effective discipline for children                                                                                                                | 2004-Jan (Reviewed 2011-Feb)  |
| 395 | P | American Academy of Pediatrics; Canadian Paediatric Society     | Prevention and management of pain in the neonate: An update                                                                                      | 2007-Jan (Reviewed 2011-Feb)  |
| 396 | L | Société canadienne de pédiatrie                                 | La prévention et la prise en charge de la douleur chez le nouveau-né: une mise à jour                                                            | 2007 (Reviewed 2011-fév)      |
| 397 | P | American Academy of Pediatrics; Canadian Paediatric Society     | Prevention and management of pain and stress in the neonate: an update                                                                           | 2007 (Reviewed 2011-Feb)      |
| 398 | H | Canadian Paediatric Society                                     | Guidelines for detection, management and prevention of hyperbilirubinemia in term and late preterm newborn infants (35 or more weeks' gestation) | 2007-June (Reviewed 2011-Feb) |

|     |   |                                                                                         |                                                                                                                                                                                           |                               |
|-----|---|-----------------------------------------------------------------------------------------|-------------------------------------------------------------------------------------------------------------------------------------------------------------------------------------------|-------------------------------|
| 399 | L | Société canadienne de pédiatrie                                                         | Lignes directrices pour la détection, la prise en charge et la prévention de l'hyperbilirubinémie chez les nouveau-nés à terme et peu prématurés (35 semaines d'âge gestationnel ou plus) | 2007-juin (Reviewed 2011-fév) |
| 400 | L | Société canadienne de pédiatrie                                                         | La prise en charge du nourrisson plus vulnérable à la septicémie                                                                                                                          | 2007-déc (Reviewed 2011-fév)  |
| 401 | M | Canadian Paediatric Society                                                             | Management of the infant at increased risk for sepsis                                                                                                                                     | 2007-Dec (Reviewed 2011-Feb)  |
| 402 | R | Alberta Health Services - Cancer Care                                                   | Referral and follow-up surveillance of cutaneous melanoma                                                                                                                                 | 2009-June (Reviewed 2011-Feb) |
| 403 | L | Société canadienne de pédiatrie                                                         | Lisez, parlez, chantez : la promotion de l'alphabétisation au cabinet du médecin                                                                                                          | 2006-nov (Reviewed 2011-fév)  |
| 404 | R | Canadian Paediatric Society                                                             | Read, speak, sing : promoting literacy in the physician's office                                                                                                                          | 2006-Nov (Reviewed 2011-Feb)  |
| 405 | D | Société canadienne de physiologie de l'exercice                                         | Directives canadiennes en matière de comportement sédentaire                                                                                                                              | 2011-fév                      |
| 406 | H | Association Canadienne d'Oncologie Psychosociale; Partenariat canadien contre le cancer | Guide pancanadien de pratique clinique : dépistage, évaluation et prise en charge de la fatigue liée au cancer chez l'adulte                                                              | 2011-fév                      |
| 407 | I | Société des obstétriciens et gynécologues du Canada                                     | Interventions de treillis transvaginales visant le prolapsus des organes pelviens                                                                                                         | 2011-fév                      |
| 408 | L | Société canadienne de pédiatrie                                                         | La prémédication en vue de l'intubation trachéale du nouveau-né                                                                                                                           | 2011-fév                      |
| 409 | L | Société canadienne de pédiatrie                                                         | La prise en charge d'urgence du patient pédiatrique en état de mal épileptique convulsif généralisé                                                                                       | 2011-fév                      |
| 410 | L | Société canadienne de pédiatrie                                                         | L'accessibilité de la thérapie intraveineuse à domicile pour les enfants et adolescents canadiens                                                                                         | 2011-fév                      |
| 411 | L | Société canadienne de pédiatrie                                                         | Le congé sécuritaire du nourrisson peu prématuré                                                                                                                                          | 2011-fév                      |
| 412 | C | Canadian Critical Care Trials Group; Canadian Critical Care Society                     | Clinical practice guidelines for the use of noninvasive positive-pressure ventilation and noninvasive continuous positive airway pressure in the acute care setting                       | 2011-Feb-14                   |

|     |   |                                                                                    |                                                                                                                                                             |          |
|-----|---|------------------------------------------------------------------------------------|-------------------------------------------------------------------------------------------------------------------------------------------------------------|----------|
| 413 | A | Canadian Association of Psychosocial Oncology; Canadian Partnership Against Cancer | A pan-Canadian practice guideline: screening, assessment and care of cancer-related fatigue in adults with cancer                                           | 2011-Feb |
| 414 | C | Canadian Cardiovascular Society                                                    | Canadian Cardiovascular Society atrial fibrillation guidelines 2010: Catheter ablation for atrial fibrillation/atrial flutter                               | 2011-Feb |
| 415 | C | Canadian Cardiovascular Society                                                    | Canadian Cardiovascular Society atrial fibrillation guidelines 2010: Etiology and initial investigations                                                    | 2011-Feb |
| 416 | C | Canadian Cardiovascular Society                                                    | Canadian Cardiovascular Society atrial fibrillation guidelines 2010: Management of recent-onset atrial fibrillation and flutter in the emergency department | 2011-Feb |
| 417 | C | Canadian Cardiovascular Society                                                    | Canadian Cardiovascular Society atrial fibrillation guidelines 2010: Prevention and treatment of atrial fibrillation following cardiac surgery              | 2011-Feb |
| 418 | C | Canadian Cardiovascular Society                                                    | Canadian Cardiovascular Society atrial fibrillation guidelines 2010: Prevention of stroke and systemic thromboembolism in atrial fibrillation and flutter   | 2011-Feb |
| 419 | C | Canadian Cardiovascular Society                                                    | Canadian Cardiovascular Society atrial fibrillation guidelines 2010: Rate and rhythm management                                                             | 2011-Feb |
| 420 | C | Canadian Cardiovascular Society                                                    | Canadian Cardiovascular Society atrial fibrillation guidelines 2010: Surgical therapy                                                                       | 2011-Feb |
| 421 | C | Canadian Working Group on Acute and Chronic Rhinosinusitis                         | Canadian clinical practice guidelines for acute and chronic rhinosinusitis                                                                                  | 2011-Feb |
| 422 | C | Canadian Society for Exercise Physiology                                           | Canadian sedentary behaviour guidelines                                                                                                                     | 2011-Feb |
| 423 | E | Canadian Paediatric Society                                                        | Emergency management of the paediatric patient with generalized convulsive status epilepticus                                                               | 2011-Feb |
| 424 | M | College of Physicians and Surgeons of Ontario                                      | Methadone maintenance treatment program standards and clinical guidelines, 4th edition February 2011                                                        | 2011-Feb |

|     |   |                                                                                                                                           |                                                                                                                                                              |                                      |
|-----|---|-------------------------------------------------------------------------------------------------------------------------------------------|--------------------------------------------------------------------------------------------------------------------------------------------------------------|--------------------------------------|
| 425 | S | Canadian Paediatric Society                                                                                                               | Safe discharge of the late preterm infant                                                                                                                    | 2011-Feb                             |
| 426 | S | Perinatal Services BC                                                                                                                     | Safe sleep environment guideline for infants 0 - 12 months of age                                                                                            | 2011-Feb                             |
| 427 | T | Society of Obstetricians and Gynaecologists of Canada                                                                                     | Transvaginal mesh procedures for pelvic organ prolapse                                                                                                       | 2011-Feb                             |
| 428 | M | Alberta Health Services - Cancer Care                                                                                                     | Merkel cell carcinoma                                                                                                                                        | 2008-May (Reviewed 2011-Feb)         |
| 429 | L | Agence de santé publique du Canada                                                                                                        | La déclaration d'effets indésirables d'antiviraux lors d'une pandémie de grippe – Ligne directrices pour les professionnels de la santé et les consommateurs | 2009-avril-30 (Reviewed 2011-mars-2) |
| 430 | R | Public Health Agency of Canada                                                                                                            | Reporting Adverse Reactions to Antiviral Drugs During an Influenza Pandemic – Guidelines for Health Professionals and Consumers                              | 2009-Apr-30 (Reviewed 2011-Mar-2)    |
| 431 | L | Société canadienne de pédiatrie                                                                                                           | Les directives sur l'équipement minimal en vue des soins préhospitaliers en pédiatrie                                                                        | 2011-mars                            |
| 432 | P | Société des gynécologues oncologues du Canada; Société canadienne des colposcopistes; Société des obstétriciens et gynécologues du Canada | Prévention du cancer du col utérin au sein de milieux ne disposant que de faibles ressources                                                                 | 2011-mars                            |
| 433 | C | Cardiometabolic Risk Working Group                                                                                                        | Cardiometabolic risk in Canada: A detailed analysis and position paper by the cardiometabolic risk working group - abstract only                             | 2011-Mar                             |
| 434 | C | Society of Gynecologic Oncologists of Canada; Society of Canadian Colposcopists; Society of Obstetricians and Gynaecologists of Canada    | Cervical cancer prevention in low-resource settings                                                                                                          | 2011-Mar                             |
| 435 | M | Canadian Thoracic Society                                                                                                                 | Managing dyspnea in patients with advanced chronic obstructive pulmonary disease: A Canadian Thoracic Society clinical practice guideline                    | 2011-Mar                             |
| 436 | M | Canadian Paediatric Society                                                                                                               | Minimum equipment guidelines for paediatric prehospital care                                                                                                 | 2011-Mar                             |
| 437 | N | Perinatal Services BC                                                                                                                     | Newborn nursing care pathway                                                                                                                                 | 2011-Mar                             |
| 438 | P | Perinatal Services BC                                                                                                                     | Postpartum nursing care pathway                                                                                                                              | 2011-Mar                             |

|     |     |                                                                                    |                                                                                                                                                                                                                                     |                              |
|-----|-----|------------------------------------------------------------------------------------|-------------------------------------------------------------------------------------------------------------------------------------------------------------------------------------------------------------------------------------|------------------------------|
| 439 | P   | Canadian Paediatric Society                                                        | Premedication for endotracheal intubation in the newborn infant                                                                                                                                                                     | 2011-Mar                     |
| 440 | R   | Canadian Cardiovascular Society; Canadian Heart Rhythm Society                     | Recommendations for the use of genetic testing in the clinical evaluation of inherited cardiac arrhythmias associated with sudden cardiac death: Canadian Cardiovascular Society/Canadian Heart Rhythm Society joint position paper | 2011-Mar                     |
| 441 | S   | Canadian Cardiovascular Society                                                    | Smoking cessation and the cardiovascular specialist: Canadian Cardiovascular Society Position Paper                                                                                                                                 | 2011-Mar                     |
| 442 | S   | Canadian Cardiovascular Society                                                    | Standardized approaches to the investigation of syncope: Canadian Cardiovascular Society position paper                                                                                                                             | 2011-Mar                     |
| 443 | S   | Canadian Cardiovascular Society; Canadian Association of Cardiac Rehabilitation    | Systematizing inpatient referral to cardiac rehabilitation 2010: Canadian Association of Cardiac Rehabilitation and Canadian Cardiovascular Society joint position paper                                                            | 2011-Mar                     |
| 444 | C   | Société des obstétriciens et gynécologues du Canada                                | Consommation de substances psychoactives pendant la grossesse                                                                                                                                                                       | 2011-avril                   |
| 445 | D   | Comité consultatif de la médecine tropicale et de la médecine des voyages (CCMTMV) | Déclaration sur la protection contre l'encéphalite japonaise                                                                                                                                                                        | 2011-avril                   |
| 446 | L   | Société canadienne de pédiatrie                                                    | L'Ankyloglossie et l'allaitement                                                                                                                                                                                                    | 2011-avril                   |
| 447 | O   | Guidelines and Protocols Advisory Committee (BC)                                   | Overweight and obese adults - Diagnosis and management                                                                                                                                                                              | 2011-Apr-1                   |
| 448 | R   | Alberta Health Services - Cancer Care                                              | Risk reduction and surveillance strategies for individuals at high genetic risk for breast and ovarian cancer                                                                                                                       | 2007-Dec (Reviewed 2011-Apr) |
| 449 | 0-9 | Canadian Consortium on Evidence-Based Care in MDS                                  | 5-Azacytidine in myelodysplastic syndromes: A clinical practice guideline                                                                                                                                                           | 2011-Apr                     |
| 450 | A   | Canadian Paediatric Society                                                        | Ankyloglossia and breastfeeding                                                                                                                                                                                                     | 2011-Apr                     |
| 451 | C   | Canadian Association of Radiologists                                               | CAR Standard for Magnetic Resonance Imaging                                                                                                                                                                                         | 2011-Apr                     |
| 452 | C   | Canadian Association of Radiologists                                               | CAR standard for performing scrotal ultrasound examinations                                                                                                                                                                         | 2011-Apr                     |
| 453 | C   | Canadian Association of Radiologists                                               | CAR Standard for performing thyroid and parathyroid ultrasound examinations                                                                                                                                                         | 2011-Apr                     |

|     |     |                                                                                                |                                                                                                                                                        |                              |
|-----|-----|------------------------------------------------------------------------------------------------|--------------------------------------------------------------------------------------------------------------------------------------------------------|------------------------------|
| 454 | O   | Ottawa Panel                                                                                   | Ottawa Panel evidence-based clinical practice guidelines for the management of osteoarthritis in adults who are obese or overweight                    | 2011-Apr                     |
| 455 | S   | Committee to Advise on Tropical Medicine and Travel (CATMAT)                                   | Statement on protection against Japanese encephalitis                                                                                                  | 2011-Apr                     |
| 456 | S   | Society of Obstetricians and Gynaecologists of Canada                                          | Substance use in pregnancy                                                                                                                             | 2011-Apr                     |
| 457 | T   | Trauma Association of Canada                                                                   | Trauma Association of Canada pediatric subcommittee national pediatric cervical spine evaluation pathway: Consensus guidelines                         | 2011-Apr                     |
| 458 | A   | Alberta Health Services - Cancer Care                                                          | Aromatase inhibitors as adjuvant therapy in postmenopausal women with early-stage hormone receptor positive breast cancer                              | 2006-Aug (Reviewed 2011-May) |
| 459 | 0-9 | Canadian Agency for Drugs and Technologies in Health                                           | 1.5 tesla magnetic resonance imaging scanners compared with 3.0 tesla magnetic resonance imaging scanners: systematic review of clinical effectiveness | 2011-May                     |
| 460 | 0-9 | Canadian Hypertension Education Program                                                        | 2011 CHEP recommendations for the management of hypertension                                                                                           | 2011-May                     |
| 461 | H   | Cancer Care Ontario's Program in Evidence-based Care                                           | Guideline on hormone receptor testing in breast cancer                                                                                                 | 2011-May                     |
| 462 | M   | Society of Obstetricians and Gynaecologists of Canada                                          | Magnesium sulphate for fetal neuroprotection                                                                                                           | 2011-May                     |
| 463 | M   | Perinatal Services BC                                                                          | Management guideline for pregnant women and neonates born to women with suspected or confirmed pandemic H1N1 influenza (swine origin A/H1N1 influenza) | 2011-May                     |
| 464 | P   | British Columbia Centre for Excellence in HIV/AIDS                                             | Primary care guidelines for the management of HIV/AIDS                                                                                                 | 2011-May                     |
| 465 | P   | Colloquium on Guidelines for the Primary Health Care of Adults with Developmental Disabilities | Primary care of adults with developmental disabilities : Canadian consensus guidelines                                                                 | 2011-May                     |
| 466 | P   | Saskatchewan Cancer Agency                                                                     | Provincial esophageal cancer and gastro-esophageal junction cancer treatment guidelines                                                                | 2011-May                     |



|     |   |                                                                                                                               |                                                                                                                                                                                   |                               |
|-----|---|-------------------------------------------------------------------------------------------------------------------------------|-----------------------------------------------------------------------------------------------------------------------------------------------------------------------------------|-------------------------------|
| 467 | T | Canadian Cardiovascular Society                                                                                               | The 2011 Canadian Cardiovascular Society heart failure management guidelines update: Focus on sleep apnea, renal dysfunction, mechanical circulatory support, and palliative care | 2011-May                      |
| 468 | T | Canadian Cardiovascular Society                                                                                               | The use of antiplatelet therapy in the outpatient setting: Canadian Cardiovascular Society guidelines                                                                             | 2011-May                      |
| 469 | U | Society of Obstetricians and Gynaecologists of Canada                                                                         | Ultrasonographic cervical length assessment in predicting preterm birth in singleton pregnancies                                                                                  | 2011-May                      |
| 470 | U | Canadian Paediatric Society                                                                                                   | Universal newborn hearing screening                                                                                                                                               | 2011-May                      |
| 471 | L | Société canadienne de pédiatrie                                                                                               | Le dépistage universel des troubles de l'audition chez les nouveau-nés                                                                                                            | 2011-mai                      |
| 472 | R | Société des obstétriciens et gynécologues du Canada                                                                           | Recours à l'évaluation échographique de la longueur cervicale pour prédire l'accouchement préterme dans le cadre de grossesses monofoetales                                       | 2011-mai                      |
| 473 | R | Société des obstétriciens et gynécologues du Canada                                                                           | Recours au sulfate de magnésium à des fins de neuroprotection fœtale                                                                                                              | 2011-mai                      |
| 474 | S | Colloque concernant les lignes directrices sur les soins de santé primaires aux adultes ayant une déficience développementale | Soins primaires aux adultes ayant une déficience développementale: Lignes directrices consensuelles canadiennes                                                                   | 2011-mai                      |
| 475 | E | Alberta Health Services - Cancer Care                                                                                         | Esophageal cancer                                                                                                                                                                 | 2010-Mar (Reviewed 2011-June) |
| 476 | H | Alberta Health Services - Cancer Care                                                                                         | Gastric cancer                                                                                                                                                                    | 2010-Mar (Reviewed 2011-June) |
| 477 | C | Canadian Association of Radiologists                                                                                          | CAR standards for irreversible compression in digital diagnostic imaging within radiology                                                                                         | 2010-Apr (Reviewed 2011-June) |
| 478 | A | Alberta Health Services - Cancer Care                                                                                         | Adenocarcinoma of the pancreas                                                                                                                                                    | 2008-Jan (Reviewed 2011-June) |
| 479 | A | Alberta Health Services - Cancer Care                                                                                         | Anal canal cancer                                                                                                                                                                 | 2008-Jan (Reviewed 2011-June) |
| 480 | M | Alberta Health Services - Cancer Care                                                                                         | Metastatic colorectal cancer                                                                                                                                                      | 2008-Jan (Reviewed 2011-June) |
| 481 | E | Alberta Health Services - Cancer Care                                                                                         | Early stage colon cancer                                                                                                                                                          | 2008-Feb (Reviewed 2011-June) |
| 482 | S | Alberta Health Services - Cancer Care                                                                                         | Stages II and III colorectal cancer surveillance                                                                                                                                  | 2008-Feb (Reviewed 2011-June) |

|     |   |                                                                 |                                                                                                                              |             |
|-----|---|-----------------------------------------------------------------|------------------------------------------------------------------------------------------------------------------------------|-------------|
| 483 | A | Cancer Care Ontario's Program in Evidence-based Care            | Adjuvant systemic chemotherapy for stage II and III colon cancer following complete resection: An updated practice guideline | 2011-June   |
| 484 | C | Canadian Association of Radiologists                            | Consensus guidelines for the prevention of contrast induced nephropathy                                                      | 2011-June   |
| 485 | E | American Academy of Pediatrics; Canadian Paediatric Society     | Early childhood caries in Indigenous communities                                                                             | 2011-June   |
| 486 | H | Mental Health Commission of Canada                              | Guidelines for comprehensive mental health services for older adults in Canada                                               | 2011-June   |
| 487 | N | Alberta Health Services - Cancer Care                           | Non-small cell lung cancer stage I                                                                                           | 2011-June   |
| 488 | N | Alberta Health Services - Cancer Care                           | Non-small cell lung cancer stage II                                                                                          | 2011-June   |
| 489 | N | Alberta Health Services - Cancer Care                           | Non-small cell lung cancer stage IV                                                                                          | 2011-June   |
| 490 | P | Saskatchewan Cancer Agency                                      | Provincial colorectal cancer treatment guidelines                                                                            | 2011-June   |
| 491 | T | Guidelines and Protocols Advisory Committee (BC)                | Testosterone testing - Protocol                                                                                              | 2011-June   |
| 492 | T | Canadian Paediatric Society                                     | The sexual abuse of young people with a disability or chronic health condition                                               | 2011-June   |
| 493 | T | Cancer Care Ontario's Program in Evidence-based Care            | The use of Folfirinox as first-line treatment for metastatic pancreatic Adenocarcinoma                                       | 2011-June   |
| 494 | U | Society of Obstetricians and Gynaecologists of Canada           | Ultrasound in twin pregnancies                                                                                               | 2011-June   |
| 495 | E | Société des obstétriciens et gynécologues du Canada             | Échographie et grossesse gémellaire                                                                                          | 2011-juin   |
| 496 | L | American Academy of Pediatrics; Société canadienne de pédiatrie | La carie de la petite enfance dans les communautés autochtones                                                               | 2011-juin   |
| 497 | L | Société canadienne de pédiatrie                                 | Les agressions sexuelles des jeunes ayant une incapacité ou une maladie chronique                                            | 2011-juin   |
| 498 | M | Cancer Care Ontario's Program in Evidence-based Care            | Management of suspicious adnexal mass                                                                                        | 2011-July-7 |
| 499 | E | Canadian Collaboration for Immigrant and Refugee Health         | Evidence-based clinical guidelines for immigrants and refugees - Canadian guidelines for immigrant health                    | 2011-July   |

|     |   |                                                                                                |                                                                                                                                                                             |                              |
|-----|---|------------------------------------------------------------------------------------------------|-----------------------------------------------------------------------------------------------------------------------------------------------------------------------------|------------------------------|
| 500 | E | Canadian Collaboration for Immigrant and Refugee Health                                        | Evidence-based clinical guidelines for immigrants and refugees - Canadian guidelines for immigrant health : Iron-deficiency anemia (page E891 - E894)                       | 2011-July                    |
| 501 | P | Canadian College of Medical Geneticists; Society of Obstetricians and Gynaecologists of Canada | Prenatal screening for and diagnosis of aneuploidy in twin pregnancies                                                                                                      | 2011-July                    |
| 502 | P | Canadian College of Medical Geneticists; Society of Obstetricians and Gynaecologists of Canada | Prenatal screening for fetal aneuploidy in singleton pregnancies                                                                                                            | 2011-July                    |
| 503 | T | Canadian Hypertension Education Program                                                        | The 2011 Canadian Hypertension Education Program recommendations for the management of hypertension: blood pressure measurement, diagnosis, assessment of risk, and therapy | 2011-July                    |
| 504 | D | Société des obstétriciens et gynécologues du Canada                                            | Dépistage et diagnostic prénatals de l'aneuploïdie en ce qui concerne les grossesses gémellaires                                                                            | 2011-juill                   |
| 505 | D | Collège canadien de généticiens médicaux; Société des obstétriciens et gynécologues du Canada  | Dépistage prénatal de l'aneuploïdie foetale en ce qui concerne les grossesses monofoetales                                                                                  | 2011-juill                   |
| 506 | S | Alberta Health Services - Cancer Care                                                          | Squamous cell carcinoma of the vulva                                                                                                                                        | 2008-Nov (Reviewed 2011-Aug) |
| 507 | A | Guidelines and Protocols Advisory Committee (BC)                                               | Abnormal liver chemistry - Evaluation and interpretation                                                                                                                    | 2011-Aug-1                   |
| 508 | B | American Academy of Pediatrics; Canadian Paediatric Society                                    | Boxing participation by children and adolescents                                                                                                                            | 2011-Aug                     |
| 509 | C | College of Physicians and Surgeons of Ontario                                                  | Clinical practice parameters and facility standards - Nuclear medicine - Fourth Edition, August 2011                                                                        | 2011-Aug                     |
| 510 | C | Cancer Care Ontario's Program in Evidence-based Care                                           | Clinical utility of positron emission tomography in the diagnosis, staging, and management of sarcoidosis: guideline recommendations                                        | 2011-Aug                     |
| 511 | M | Society of Obstetricians and Gynaecologists of Canada                                          | Maternity leave in normal pregnancy                                                                                                                                         | 2011-Aug                     |
| 512 | P | Canadian Urological Association                                                                | Prostate cancer screening: Canadian guidelines 2011                                                                                                                         | 2011-Aug                     |

|     |   |                                                                 |                                                                                                                                                                              |                                     |
|-----|---|-----------------------------------------------------------------|------------------------------------------------------------------------------------------------------------------------------------------------------------------------------|-------------------------------------|
| 513 | R | Cancer Care Ontario's Program in Evidence-based Care            | Radionuclide therapy for neuroendocrine malignancies                                                                                                                         | 2011-Aug                            |
| 514 | S | Society of Obstetricians and Gynaecologists of Canada           | Sexual and reproductive health counselling by health care professionals                                                                                                      | 2011-Aug                            |
| 515 | U | Alberta Health Services - Cancer Care                           | Uterine sarcoma                                                                                                                                                              | 2011-Aug                            |
| 516 | C | Société des obstétriciens et gynécologues du Canada             | Congé de maternité dans le cadre d'une grossesse normale                                                                                                                     | 2011-août                           |
| 517 | C | Société des obstétriciens et gynécologues du Canada             | Counseling sur la santé sexuelle et génésique offert par les professionnels de la santé                                                                                      | 2011-août                           |
| 518 | L | American Academy of Pediatrics; Société canadienne de pédiatrie | La participation des enfants et des adolescents à la boxe                                                                                                                    | 2011-août                           |
| 519 | P | Collège des médecins du Québec                                  | Procédures et interventions en milieu extrahospitalier                                                                                                                       | 2011-août                           |
| 520 | T | Cancer Care Ontario's Program in Evidence-based Care            | The role of gemcitabine in the management of metastatic breast cancer : a clinical practice guideline                                                                        | 2007-Jan (Reviewed 2011-Sept-15)    |
| 521 | A | Cancer Care Ontario's Program in Evidence-based Care            | Adjuvant chemotherapy following complete resection of soft tissue sarcoma in adults                                                                                          | 2002-Oct (Reviewed 2011-Sept)       |
| 522 | D | Cancer Care Ontario's Program in Evidence-based Care            | Doxorubicin-based chemotherapy for the palliative treatment of adult patients with locally advanced or metastatic soft tissue sarcoma                                        | 2001-July (Reviewed 2011-Sept)      |
| 523 | E | Cancer Care Ontario's Program in Evidence-based Care            | Epidermal growth factor receptor (EGFR) targeted therapy in stage III and IV head and neck cancer                                                                            | 2009-May-15 (Reviewed 2011-Sept-30) |
| 524 | I | Cancer Care Ontario's Program in Evidence-based Care            | Interleukin-2 in the treatment of patients with unresectable or metastatic renal cell cancer                                                                                 | 2006-June-8 (Reviewed 2011-Sept-15) |
| 525 | P | Guidelines and Protocols Advisory Committee (BC)                | Palliative care for the patient with incurable cancer or advanced disease - Part 2: Pain and symptom management                                                              | 2011-Sept-30                        |
| 526 | P | Guidelines and Protocols Advisory Committee (BC)                | Palliative care for the patient with incurable cancer or advanced disease - Part 3: Grief and bereavement                                                                    | 2011-Sept-30                        |
| 527 | C | Canadian Rheumatology Association                               | Canadian Rheumatology Association recommendations for pharmacological management of rheumatoid arthritis with traditional and biologic disease-modifying antirheumatic drugs | 2011-Sept                           |

|     |   |                                                                                                |                                                                                                                                                                  |                              |
|-----|---|------------------------------------------------------------------------------------------------|------------------------------------------------------------------------------------------------------------------------------------------------------------------|------------------------------|
| 528 | D | Canadian Working Group on Statin Adverse Effects                                               | Diagnosis, prevention, and management of statin adverse effects and intolerance: Proceedings of a Canadian working group consensus conference                    | 2011-Sept                    |
| 529 | E | Registered Nurses' Association of Ontario                                                      | End-of-life care during the last days and hours                                                                                                                  | 2011-Sept                    |
| 530 | H | Eye Health Council of Ontario                                                                  | Guidelines for the collaborative management of persons with diabetes mellitus by eye care professionals (page 26-35)                                             | 2011-Sept                    |
| 531 | L | Société canadienne de pédiatrie                                                                | La prévention de la varicelle : les recommandations à l'égard de la vaccination antivarielleuse systématique à deux doses chez les enfants                       | 2011-sept                    |
| 532 | L | Eye Health Council of Ontario                                                                  | Lignes directrices sur la prise en charge concertée des personnes qui ont le diabète sucré par des professionnels des soins ophtalmiques (page 38-48)            | 2011-sept                    |
| 533 | P | Canadian Paediatric Society                                                                    | Preventing varicella: Recommendations for routine two-dose varicella immunization in children                                                                    | 2011-Sept                    |
| 534 | P | Saskatchewan Cancer Agency                                                                     | Provincial central nervous system cancer treatment guidelines                                                                                                    | 2011-Sept                    |
| 535 | R | Collège canadien de généticiens médicaux; Société des obstétriciens et gynécologues du Canada  | Recours à une méthode ADN (QF-PCR) dans le diagnostic prénatal des aneuploïdies foetales                                                                         | 2011-sept                    |
| 536 | R | Canadian Association of Optometrists                                                           | Review of the Canadian Association of Optometrists frequency of eye examinations guideline - Summary: An evidence-based approach (page 15-16)                    | 2011-Sept                    |
| 537 | R | L'Association canadienne des optométristes                                                     | Révision des lignes directrices de l'Association canadienne des optométristes sur la fréquence des examens de la vue – sommaire: Approche factuelle (page 18-19) | 2011-sept                    |
| 538 | U | Canadian College of Medical Geneticists; Society of Obstetricians and Gynaecologists of Canada | Use of a DNA Method, QF-PCR, in the prenatal diagnosis of fetal aneuploidies                                                                                     | 2011-Sept                    |
| 539 | R | Alberta Health Services - Cancer Care                                                          | Renal cell carcinoma and genetic testing                                                                                                                         | 2007-Dec (Reviewed 2011-Oct) |

|     |   |                                                       |                                                                                                                                         |                              |
|-----|---|-------------------------------------------------------|-----------------------------------------------------------------------------------------------------------------------------------------|------------------------------|
| 540 | A | Société des obstétriciens et gynécologues du Canada   | Autopsies foetales et périnatales dans les cas d'anomalies foetales diagnostiquées avant la naissance en présence d'un caryotype normal | 2011-oct                     |
| 541 | C | Canadian College of Medical Geneticists               | Canadian College of Medical Geneticists guidelines for the indications, analysis, and reporting of cancer specimens                     | 2011-Oct                     |
| 542 | C | Cancer Care Ontario's Program in Evidence-based Care  | Cervical screening                                                                                                                      | 2011-Oct                     |
| 543 | F | Society of Obstetricians and Gynaecologists of Canada | Fetal and perinatal autopsy in prenatally diagnosed fetal abnormalities with normal karyotype                                           | 2011-Oct                     |
| 544 | H | Canadian Urological Association                       | Guidelines for the diagnosis and management of recurrent urinary tract infection in women                                               | 2011-Oct                     |
| 545 | L | Société canadienne de pédiatrie                       | La prévention des infections par le virus respiratoire syncytial                                                                        | 2011-oct                     |
| 546 | L | Société canadienne de pédiatrie                       | Les vaccins contre le méningocoque au Canada : une mise à jour                                                                          | 2011-oct                     |
| 547 | L | Commission de la santé mentale du Canada              | Lignes directrices relatives à la planification et la prestation de services complets en santé mentale pour les aînés canadiens         | 2011-oct                     |
| 548 | L | Société canadienne de pédiatrie                       | L'utilisation du vaccin contre l'influenza chez les enfants allergiques aux œufs                                                        | 2011-oct                     |
| 549 | M | Canadian Paediatric Society                           | Meningococcal vaccines in Canada: An update                                                                                             | 2011-Oct                     |
| 550 | P | Canadian Paediatric Society                           | Preventing respiratory syncytial virus infections                                                                                       | 2011-Oct                     |
| 551 | U | Canadian Paediatric Society                           | Use of influenza vaccines in children with an egg allergy                                                                               | 2011-Oct                     |
| 552 | H | Toward Optimized Practice [Alberta]                   | Guideline and screening for cervical cancer                                                                                             | 2007-Feb (Reviewed 2011-Nov) |
| 553 | O | Cancer Care Ontario's Program in Evidence-based Care  | Optimal chemotherapy for recurrent ovarian cancer                                                                                       | 2011-Nov-21                  |
| 554 | A | Toward Optimized Practice [Alberta]                   | Active tuberculosis : Diagnosis and management guideline                                                                                | 2011-Nov                     |
| 555 | A | Society of Obstetricians and Gynaecologists of Canada | Advanced reproductive age and fertility                                                                                                 | 2011-Nov                     |
| 556 | A | Société des obstétriciens et gynécologues du Canada   | Âge génésique avancé et fertilité                                                                                                       | 2011-nov                     |

|     |   |                                                                                                      |                                                                                                                                                      |                              |
|-----|---|------------------------------------------------------------------------------------------------------|------------------------------------------------------------------------------------------------------------------------------------------------------|------------------------------|
| 557 | B | Cancer Care Ontario's Program in Evidence-based Care                                                 | Baseline staging tests in primary breast cancer                                                                                                      | 2011-Nov                     |
| 558 | D | Société canadienne de fertilité et d'andrologie; Société des obstétriciens et gynécologues du Canada | Diagnostic et prise en charge du syndrome d'hyperstimulation ovarienne                                                                               | 2011-nov                     |
| 559 | L | Société canadienne de pédiatrie                                                                      | Les inhibiteurs spécifiques du recaptage de la sérotonine pendant la grossesse et l'issue du nourrisson                                              | 2011-nov                     |
| 560 | O | Canadian Agency for Drugs and Technologies in Health                                                 | Optimal use recommendations for atypical antipsychotics: combination and high-dose treatment strategies in adolescents and adults with schizophrenia | 2011-Nov                     |
| 561 | O | Osteoporosis Canada                                                                                  | Osteoporosis Canada 2010 Guidelines for the assessment of fracture risk - abstract only                                                              | 2011-Nov                     |
| 562 | R | Canadian Agency for Drugs and Technologies in Health                                                 | Recommendations for optimal warfarin management for prevention of thromboembolic events in patients with atrial fibrillation                         | 2011-Nov                     |
| 563 | R | Canadian Task Force on Preventive Health Care                                                        | Recommendations on screening for breast cancer in average-risk women aged 40–74 years                                                                | 2011-Nov                     |
| 564 | S | Canadian Paediatric Society                                                                          | Selective serotonin reuptake inhibitors in pregnancy and infant outcomes                                                                             | 2011-Nov                     |
| 565 | T | Canadian Fertility and Andrology Society; Society of Obstetricians and Gynaecologists of Canada      | The diagnosis and management of ovarian hyperstimulation syndrome                                                                                    | 2011-Nov                     |
| 566 | S | Alberta Health Services - Cancer Care                                                                | Sentinel lymph node biopsy and axillary node dissection in early stage breast cancer                                                                 | 2007-Jan (Reviewed 2011-Dec) |
| 567 | B | Société canadienne de pédiatrie                                                                      | Bien faire ce qu'il faut à 18 mois : en appui au bilan de santé amélioré                                                                             | 2011-déc                     |
| 568 | L | Société canadienne de pédiatrie                                                                      | Les mesures, en appui au développement de la petite enfance                                                                                          | 2011-déc                     |
| 569 | R | Société des obstétriciens et gynécologues du Canada                                                  | Recours à la technologie d'hybridation génomique matricielle dans le cadre du diagnostic prénatal au Canada                                          | 2011-déc                     |
| 570 | H | Canadian Paediatric Society                                                                          | Getting it right at 18 months: In support of an enhanced well-baby visit                                                                             | 2011-Dec                     |

|     |   |                                                                                                                   |                                                                                                                          |                              |
|-----|---|-------------------------------------------------------------------------------------------------------------------|--------------------------------------------------------------------------------------------------------------------------|------------------------------|
| 571 | M | Canadian Paediatric Society                                                                                       | Measuring in support of early childhood development                                                                      | 2011-Dec                     |
| 572 | U | Society of Obstetricians and Gynaecologists of Canada                                                             | Use of array genomic hybridization technology in prenatal diagnosis in Canada                                            | 2011-Dec                     |
| 573 | C | Canadian Consensus Group on Treatment of HIV-infected Adults                                                      | Canadian consensus guidelines for the optimal use of maraviroc in the treatment of HIV-infected adults                   | 2010                         |
| 574 | C | Guidelines and Protocols Advisory Committee (BC)                                                                  | Cardiovascular disease - primary prevention                                                                              | 2010                         |
| 575 | I | Public Health Agency of Canada                                                                                    | Infection prevention and control guideline for flexible gastrointestinal endoscopy and flexible bronchoscopy             | 2010                         |
| 576 | C | Canadian Cardiovascular Society; Canadian Academy of Child and Adolescent Psychiatry; Canadian Paediatric Society | Cardiac risk assessment before the use of stimulant medications in children and youth                                    | 2009-Nov (Reviewed 2010)     |
| 577 | L | Agence de santé publique du Canada                                                                                | Lignes directrices canadiennes sur les infections transmissibles sexuellement - Mise-à-jour janvier 2010                 | 2006 (Reviewed 2010-janv)    |
| 578 | S | Registered Nurses' Association of Ontario                                                                         | Screening for delirium, dementia and depression in older adults                                                          | 2003 (Reviewed 2010)         |
| 579 | N | Registered Nurses' Association of Ontario                                                                         | Nursing care of dyspnea: The 6th vital sign in individuals with chronic obstructive pulmonary disease (COPD)             | 2005 (Reviewed 2010)         |
| 580 | C | Registered Nurses' Association of Ontario                                                                         | Caregiving strategies for older adults with delirium, dementia and depression                                            | 2004 (Reviewed 2010)         |
| 581 | L | Agence de santé publique du Canada                                                                                | Lignes directrices canadiennes sur les infections transmissibles sexuellement : Syphilis - Révisé janvier 2010           | 2006 (Reviewed 2010-janv)    |
| 582 | C | Public Health Agency of Canada                                                                                    | Canadian guidelines on sexually transmitted infections - updated January 2010                                            | 2006 (Reviewed 2010-Jan)     |
| 583 | C | Public Health Agency of Canada                                                                                    | Canadian guidelines on sexually transmitted infections : Syphilis - revised January 2010                                 | 2006 (Reviewed 2010-Jan)     |
| 584 | C | Canadian Paediatric Society                                                                                       | Current management of herpes simplex virus infection in pregnant women and their newborn infants                         | 2006-Aug (Reviewed 2010-Jan) |
| 585 | L | Société canadienne de pédiatrie                                                                                   | Le traitement familial des enfants et des adolescents anorexiques : Des lignes directrices pour le médecin communautaire | 2010-janv                    |



|     |   |                                                                                                                                                                                      |                                                                                                                                                                                                                                                                                                                                                  |                                    |
|-----|---|--------------------------------------------------------------------------------------------------------------------------------------------------------------------------------------|--------------------------------------------------------------------------------------------------------------------------------------------------------------------------------------------------------------------------------------------------------------------------------------------------------------------------------------------------|------------------------------------|
| 586 | A | Guidelines and Protocols Advisory Committee (BC)                                                                                                                                     | Anxiety and depression in children and youth - diagnosis and treatment                                                                                                                                                                                                                                                                           | 2010-Jan-1                         |
| 587 | T | Guidelines and Protocols Advisory Committee (BC)                                                                                                                                     | Thyroid function tests in the diagnosis and monitoring of adults                                                                                                                                                                                                                                                                                 | 2010-Jan-1                         |
| 588 | C | Canadian Association of Radiologists                                                                                                                                                 | CAR CT colonography standards                                                                                                                                                                                                                                                                                                                    | 2010-Jan                           |
| 589 | C | Canadian Association of Radiologists                                                                                                                                                 | CAR technical standards for bone mineral densitometry reporting                                                                                                                                                                                                                                                                                  | 2010-Jan                           |
| 590 | F | Canadian Paediatric Society                                                                                                                                                          | Family-based treatment of children and adolescents with anorexia nervosa: Guidelines for the community physician                                                                                                                                                                                                                                 | 2010-Jan                           |
| 591 | M | Society of Interventional Radiology; Canadian Interventional Radiology Association; American College of Phlebology; Cardiovascular and Interventional Radiological Society of Europe | Multi-disciplinary quality improvement guidelines for the treatment of lower extremity superficial venous insufficiency with ambulatory phlebectomy from the Society of Interventional Radiology, Cardiovascular Interventional Radiological Society of Europe, American College of Phlebology and Canadian Interventional Radiology Association | 2010-Jan                           |
| 592 | O | Guidelines and Protocols Advisory Committee (BC)                                                                                                                                     | Otitis media: Acute otitis media (AOM) & otitis media with effusion (OME)                                                                                                                                                                                                                                                                        | 2010-Jan                           |
| 593 | S | Society of Obstetricians and Gynaecologists of Canada                                                                                                                                | Supracervical hysterectomy                                                                                                                                                                                                                                                                                                                       | 2010-Jan                           |
| 594 | T | Cancer Care Ontario's Program in Evidence-based Care                                                                                                                                 | Treatment of anemia with erythropoietic agents in patients with cancer - adaption/Adoption of ASH-ASCO guidelines: Guideline recommendations                                                                                                                                                                                                     | 2010-Jan                           |
| 595 | H | Guidelines and Protocols Advisory Committee (BC)                                                                                                                                     | Gastroesophageal reflux disease - clinical approach in adults                                                                                                                                                                                                                                                                                    | 2009-Jan-30 (Reviewed 2010-Jan-30) |
| 596 | H | Toward Optimized Practice [Alberta]                                                                                                                                                  | Guideline for adult insomnia : assessment to diagnosis                                                                                                                                                                                                                                                                                           | 2006-Feb (Reviewed 2010-Feb)       |
| 597 | H | Toward Optimized Practice [Alberta]                                                                                                                                                  | Guideline for adult primary insomnia: diagnosis to management                                                                                                                                                                                                                                                                                    | 2006-Feb (Reviewed 2010-Feb)       |
| 598 | S | Toward Optimized Practice [Alberta]                                                                                                                                                  | Summary for the diagnosis and management of osteoporosis - Summary of the 2002 Canadian guidelines for the diagnosis and management of osteoporosis, revised 2010                                                                                                                                                                                | 2003 (Reviewed 2010-Feb)           |

|     |   |                                          |                                                                                                                                                                                                                                   |                              |
|-----|---|------------------------------------------|-----------------------------------------------------------------------------------------------------------------------------------------------------------------------------------------------------------------------------------|------------------------------|
| 599 | R | Toward Optimized Practice [Alberta]      | Recommendations for the diagnosis and management of hemochromatosis                                                                                                                                                               | 2007-Feb (Reviewed 2010-Feb) |
| 600 | A | Alberta Health Services - Cancer Care    | Anaplastic astrocytomas and oligodendrogliomas                                                                                                                                                                                    | 2008-Apr (Reviewed 2010-Feb) |
| 601 | H | Alberta Health Services - Cancer Care    | Glioblasoma                                                                                                                                                                                                                       | 2008-Apr (Reviewed 2010-Feb) |
| 602 | H | Toward Optimized Practice [Alberta]      | Guideline for the investigation and management of erectile dysfunction                                                                                                                                                            | 2001 (Reviewed 2010-Feb)     |
| 603 | M | Association des chemins de fer du Canada | Manuel du règlement médical des chemins de fer (postes classifiés comme essentiels pour la sécurité ferroviaire)                                                                                                                  | 2010-fév                     |
| 604 | M | Association des chemins de fer du Canada | Manuel du règlement médical des chemins de fer (postes classifiés comme essentiels pour la sécurité ferroviaire) : Section 4 : lignes directrices médicales des compagnies ferroviaires : 4.10 Opiïodes à des fins thérapeutiques | 2010-fév                     |
| 605 | M | Association des chemins de fer du Canada | Manuel du règlement médical des chemins de fer (postes classifiés comme essentiels pour la sécurité ferroviaire) : Section 4 : lignes directrices médicales des compagnies ferroviaires : 4.2 Audition                            | 2010-fév                     |
| 606 | M | Association des chemins de fer du Canada | Manuel du règlement médical des chemins de fer (postes classifiés comme essentiels pour la sécurité ferroviaire) : Section 4 : lignes directrices médicales des compagnies ferroviaires : 4.3 Vision                              | 2010-fév                     |
| 607 | M | Association des chemins de fer du Canada | Manuel du règlement médical des chemins de fer (postes classifiés comme essentiels pour la sécurité ferroviaire) : Section 4 : lignes directrices médicales des compagnies ferroviaires : 4.4 Troubles convulsifs                 | 2010-fév                     |
| 608 | M | Association des chemins de fer du Canada | Manuel du règlement médical des chemins de fer (postes classifiés comme essentiels pour la sécurité ferroviaire) : Section 4 : lignes directrices médicales des compagnies ferroviaires : 4.5 Troubles mentaux                    | 2010-fév                     |

|     |   |                                                     |                                                                                                                                                                                                                                             |          |
|-----|---|-----------------------------------------------------|---------------------------------------------------------------------------------------------------------------------------------------------------------------------------------------------------------------------------------------------|----------|
| 609 | M | Association des chemins de fer du Canada            | Manuel du règlement médical des chemins de fer (postes classifiés comme essentiels pour la sécurité ferroviaire) : Section 4 : lignes directrices médicales des compagnies ferroviaires : 4.6 Troubles cardiovasculaires                    | 2010-fév |
| 610 | M | Association des chemins de fer du Canada            | Manuel du règlement médical des chemins de fer (postes classifiés comme essentiels pour la sécurité ferroviaire) : Section 4 : lignes directrices médicales des compagnies ferroviaires : 4.7 Diabète                                       | 2010-fév |
| 611 | M | Association des chemins de fer du Canada            | Manuel du règlement médical des chemins de fer (postes classifiés comme essentiels pour la sécurité ferroviaire) : Section 4 : lignes directrices médicales des compagnies ferroviaires : 4.8 Troubles liés à l'utilisation d'une substance | 2010-fév |
| 612 | M | Association des chemins de fer du Canada            | Manuel du règlement médical des chemins de fer (postes classifiés comme essentiels pour la sécurité ferroviaire) : Section 4 : lignes directrices médicales des compagnies ferroviaires 4.9 Apnée grave du sommeil                          | 2010-fév |
| 613 | O | Société des obstétriciens et gynécologues du Canada | Obésité et grossesse                                                                                                                                                                                                                        | 2010-fév |
| 614 | C | Railway Association of Canada                       | Canadian railway medical rules handbook (for positions critical to safe railway operations)                                                                                                                                                 | 2010-Feb |
| 615 | C | Railway Association of Canada                       | Canadian railway medical rules handbook (for positions critical to safe railway operations) : Section 4 - Railway medical guidelines : 4.10 Therapeutic opioids                                                                             | 2010-Feb |
| 616 | C | Railway Association of Canada                       | Canadian railway medical rules handbook (for positions critical to safe railway operations) : Section 4 - Railway medical guidelines : 4.2 Hearing                                                                                          | 2010-Feb |
| 617 | C | Railway Association of Canada                       | Canadian railway medical rules handbook (for positions critical to safe railway operations) : Section 4 - Railway medical guidelines : 4.3 Vision                                                                                           | 2010-Feb |

|     |   |                                                       |                                                                                                                                                                     |          |
|-----|---|-------------------------------------------------------|---------------------------------------------------------------------------------------------------------------------------------------------------------------------|----------|
| 618 | C | Railway Association of Canada                         | Canadian railway medical rules handbook (for positions critical to safe railway operations) : Section 4 - Railway medical guidelines : 4.4 Epileptic seizures       | 2010-Feb |
| 619 | C | Railway Association of Canada                         | Canadian railway medical rules handbook (for positions critical to safe railway operations) : Section 4 - Railway medical guidelines : 4.5 Mental disorders         | 2010-Feb |
| 620 | C | Railway Association of Canada                         | Canadian railway medical rules handbook (for positions critical to safe railway operations) : Section 4 - Railway medical guidelines : 4.6 Cardiovascular disorders | 2010-Feb |
| 621 | C | Railway Association of Canada                         | Canadian railway medical rules handbook (for positions critical to safe railway operations) : Section 4 - Railway medical guidelines : 4.7 Diabetes                 | 2010-Feb |
| 622 | C | Railway Association of Canada                         | Canadian railway medical rules handbook (for positions critical to safe railway operations) : Section 4 - Railway medical guidelines : 4.8 Substance use disorders  | 2010-Feb |
| 623 | C | Railway Association of Canada                         | Canadian railway medical rules handbook (for positions critical to safe railway operations) : Section 4 - Railway medical guidelines : 4.9 Severe sleep apnea       | 2010-Feb |
| 624 | C | Canadian Thoracic Society                             | Canadian Thoracic Society Asthma Management Continuum – 2010 consensus summary for children six years of age and over, and adults                                   | 2010-Feb |
| 625 | F | Cancer Care Ontario's Program in Evidence-based Care  | First-line systemic chemotherapy in the treatment of advanced non-small cell lung cancer                                                                            | 2010-Feb |
| 626 | H | Canadian Coalition for Seniors' Mental Health         | Guideline on the assessment and treatment of delirium in older adults at the end of life                                                                            | 2010-Feb |
| 627 | M | Perinatal Services BC                                 | Maternity care pathway                                                                                                                                              | 2010-Feb |
| 628 | O | Society of Obstetricians and Gynaecologists of Canada | Obesity in pregnancy                                                                                                                                                | 2010-Feb |
| 629 | O | WorkSafe BC                                           | Occupational dental erosion                                                                                                                                         | 2010-Feb |
| 630 | R | Toward Optimized Practice [Alberta]                   | Recommendations for MRSA a community problem                                                                                                                        | 2010-Feb |

|     |   |                                                                   |                                                                                                                                                                                                                                      |           |
|-----|---|-------------------------------------------------------------------|--------------------------------------------------------------------------------------------------------------------------------------------------------------------------------------------------------------------------------------|-----------|
| 631 | S | Toward Optimized Practice [Alberta]                               | Summary for the diagnosis and management of COPD                                                                                                                                                                                     | 2010-Feb  |
| 632 | S | Toward Optimized Practice [Alberta]                               | Summary for the diagnosis of gluten-sensitive enteropathy (celiac disease) : A summary of the NASPGHAN guidelines                                                                                                                    | 2010-Feb  |
| 633 | C | Société des obstétriciens et gynécologues du Canada               | Contraceptifs oraux et risque de thromboembolie veineuse : Mise à jour                                                                                                                                                               | 2010-déc  |
| 634 | L | Société canadienne de pédiatrie                                   | Les visites en soins de santé préventifs pour les enfants et les adolescents de six à 17 ans : Le relevé médical Greig - Résumé                                                                                                      | 2010-mars |
| 635 | C | Canadian Cardiovascular Society                                   | Canadian Cardiovascular Society 2009 consensus conference on the management of adults with congenital heart disease: Complex congenital cardiac lesions                                                                              | 2010-Mar  |
| 636 | C | Canadian Cardiovascular Society                                   | Canadian Cardiovascular Society 2009 Consensus Conference on the management of adults with congenital heart disease: Executive summary                                                                                               | 2010-Mar  |
| 637 | C | Canadian Cardiovascular Society                                   | Canadian Cardiovascular Society 2009 Consensus Conference on the management of adults with congenital heart disease: Introduction                                                                                                    | 2010-Mar  |
| 638 | C | Canadian Cardiovascular Society                                   | Canadian Cardiovascular Society 2009 Consensus Conference on the management of adults with congenital heart disease: Outflow tract obstruction, coarctation of the aorta, tetralogy of Fallot, Ebstein anomaly and Marfan's syndrome | 2010-Mar  |
| 639 | C | Canadian Cardiovascular Society                                   | Canadian Cardiovascular Society 2009 Consensus Conference on the management of adults with congenital heart disease: Shunt lesions                                                                                                   | 2010-Mar  |
| 640 | C | Association of Medical Microbiology and Infectious Disease Canada | Canadian practice guidelines for surgical intra-abdominal infections                                                                                                                                                                 | 2010-Mar  |
| 641 | H | Toward Optimized Practice [Alberta]                               | Guideline for the diagnosis and management of urinary tract infections in long term care                                                                                                                                             | 2010-Mar  |

|     |   |                                                                                                      |                                                                                                                                                                                           |                          |
|-----|---|------------------------------------------------------------------------------------------------------|-------------------------------------------------------------------------------------------------------------------------------------------------------------------------------------------|--------------------------|
| 642 | P | Canadian Paediatric Society                                                                          | Preventive health care visits for children and adolescents aged six to 17 years : The Greig Health Record - Executive summary                                                             | 2010-Mar                 |
| 643 | I | Société des obstétriciens et gynécologues du Canada                                                  | Infection à cytomégalovirus pendant la grossesse                                                                                                                                          | 2010-avril               |
| 644 | L | Société canadienne de pédiatrie                                                                      | L'endocardite infectieuse : Mise à jour des lignes directrice                                                                                                                             | 2010-avril               |
| 645 | L | Société canadienne de fertilité et d'andrologie; Société des obstétriciens et gynécologues du Canada | Le Transfert sélectif d'un seul embryon à la suite de la fécondation in vitro                                                                                                             | 2010-avril               |
| 646 | L | Académie canadienne de la médecine du sport et de l'exercice; Société canadienne de pédiatrie        | Les recommandations en matière d'activité physique pour les enfants ayant une maladie chronique précise : l'arthrite juvénile idiopathique, l'hémophilie, l'asthme ou la fibrose kystique | 2010-avril               |
| 647 | C | College of Physicians and Surgeons of Ontario                                                        | Clinical practice parameters and facility standards: Computed tomography - 2nd edition 2009 (revised April 2010)                                                                          | 2009 (Reviewed 2010-Apr) |
| 648 | C | College of Physicians and Surgeons of Ontario                                                        | Clinical Practice Parameters and Facility Standards: Magnetic resonance imaging - 2nd edition 2009 (Revised April 2010)                                                                   | 2009 (Reviewed 2010-Apr) |
| 649 | C | Association of Medical Microbiology and Infectious Disease Canada                                    | Canadian clinical practice guidelines for invasive candidiasis in adults                                                                                                                  | 2010-Apr                 |
| 650 | C | Canadian Germ Cell Cancer Consensus Conference                                                       | Canadian consensus guidelines for the management of testicular germ cell cancer                                                                                                           | 2010-Apr                 |
| 651 | C | National Opioid Use Guideline Group                                                                  | Canadian guideline for safe and effective use of opioids for chronic non-cancer pain - Part A: Executive summary and background                                                           | 2010-Apr                 |
| 652 | C | National Opioid Use Guideline Group                                                                  | Canadian guideline for safe and effective use of opioids for chronic non-cancer pain — Part B: Recommendations for practice                                                               | 2010-Apr                 |
| 653 | C | Society of Obstetricians and Gynaecologists of Canada                                                | Cytomegalovirus infection in pregnancy                                                                                                                                                    | 2010-Apr                 |

|     |   |                                                                                                 |                                                                                                                                                                                                                                                         |                               |
|-----|---|-------------------------------------------------------------------------------------------------|---------------------------------------------------------------------------------------------------------------------------------------------------------------------------------------------------------------------------------------------------------|-------------------------------|
| 654 | E | Canadian Fertility and Andrology Society; Society of Obstetricians and Gynaecologists of Canada | Elective single embryo transfer following in vitro fertilization                                                                                                                                                                                        | 2010-Apr                      |
| 655 | I | Canadian Paediatric Society                                                                     | Infective endocarditis: Updated guidelines                                                                                                                                                                                                              | 2010-Apr                      |
| 656 | P | Canadian Academy of Sport and Exercise Medicine; Canadian Paediatric Society                    | Physical activity recommendations for children with specific chronic health conditions: Juvenile idiopathic arthritis, hemophilia, asthma and cystic fibrosis                                                                                           | 2010-Apr                      |
| 657 | T | Canadian Cardiovascular Society                                                                 | The 2010 Canadian Cardiovascular Society guidelines for the diagnosis and management of heart failure update: Heart failure in ethnic minority populations, heart failure and pregnancy, disease management, and quality improvement/assurance programs | 2010-Apr                      |
| 658 | I | Cancer Care Ontario's Program in Evidence-based Care                                            | Imatinib mesylate in the adjuvant treatment of gastrointestinal stromal tumours (GIST)                                                                                                                                                                  | 2010-May-31                   |
| 659 | P | Cancer Care Ontario's Program in Evidence-based Care                                            | Primary excision margins and sentinel lymph node biopsy in clinically node-negative cutaneous melanoma of the trunk or extremities: Guideline recommendations                                                                                           | 2010-May-17                   |
| 660 | M | Alberta Health Services - Cancer Care                                                           | Management of in-transit disease of the limbs                                                                                                                                                                                                           | 2010-May                      |
| 661 | O | National Opioid Use Guideline Group                                                             | Opioids for chronic noncancer pain: a new Canadian practice guideline                                                                                                                                                                                   | 2010-May                      |
| 662 | O | Society of Obstetricians and Gynaecologists of Canada                                           | Ovulation induction in polycystic ovary syndrome                                                                                                                                                                                                        | 2010-May                      |
| 663 | D | Société des obstétriciens et gynécologues du Canada                                             | Déclenchement de l'ovulation en présence du syndrome des ovaires polykystiques                                                                                                                                                                          | 2010-mai                      |
| 664 | T | Cancer Care Ontario's Program in Evidence-based Care                                            | The role of trastuzumab in adjuvant and neoadjuvant therapy in women with HER2/neu-overexpressing breast cancer: a clinical practice guideline                                                                                                          | 2006-Jan (Reviewed 2010-June) |
| 665 | U | Canadian Paediatric Society                                                                     | Use and misuse of tobacco among aboriginal peoples - update 2006                                                                                                                                                                                        | 2006-Dec (Reviewed 2010-June) |

|     |     |                                                        |                                                                                                                      |                               |
|-----|-----|--------------------------------------------------------|----------------------------------------------------------------------------------------------------------------------|-------------------------------|
| 666 | L   | Société canadienne de pédiatrie                        | L'usage et le mésusage du tabac chez les autochtones - mise à jour 2006                                              | 2006-déc (Reviewed 2010-juin) |
| 667 | T   | Cancer Care Ontario's Program in Evidence-based Care   | The role of trastuzumab (Herceptin) in the treatment of women with HER2/neu-Overexpressing metastatic breast cancer  | 2005-Nov (Reviewed 2010-June) |
| 668 | A   | Guidelines and Protocols Advisory Committee (BC)       | Asthma - diagnosis and management                                                                                    | 2005-May (Reviewed 2010-June) |
| 669 | I   | Guidelines and Protocols Advisory Committee (BC)       | Iron deficiency - Investigation and management                                                                       | 2010-June-15                  |
| 670 | P   | Guidelines and Protocols Advisory Committee (BC)       | Palliative care for the patient with incurable cancer or advanced disease - Part 1: approach to care                 | 2010-June-15                  |
| 671 | 0-9 | Canadian Prostate Health Council                       | 2010 Update: Guidelines for the management of benign prostatic hyperplasia                                           | 2010-June                     |
| 672 | A   | Society of Obstetricians and Gynaecologists of Canada  | Adhesion prevention in gynaecological surgery                                                                        | 2010-June                     |
| 673 | A   | Cancer Care Ontario's Program in Evidence-based Care   | Adjuvant ovarian ablation in the treatment of premenopausal women with early stage invasive breast cancer            | 2010-June                     |
| 674 | C   | Canadian Urological Association                        | Canadian guidelines for treatment of non-muscle invasive bladder cancer: a focus on intravesical therapy             | 2010-June                     |
| 675 | C   | Canadian Urological Association                        | CUA guidelines: The work-up of azoospermic males                                                                     | 2010-June                     |
| 676 | C   | Ontario Agency for Health Protection and Promotion     | Cyclosporin: A clinical practice guideline                                                                           | 2010-June                     |
| 677 | E   | Canadian Psychiatric Association                       | Electroconvulsive therapy                                                                                            | 2010-June                     |
| 678 | E   | Canadian Urological Association                        | Evaluation and medical management of the kidney stone patient                                                        | 2010-June                     |
| 679 | H   | Ontario Association of Medical Laboratories            | Guideline for the appropriate ordering of serum tests for 25-hydroxy vitamin D and 1,25-dihydroxy vitamin D (CLP026) | 2010-June                     |
| 680 | H   | Canadian Urological Association                        | Guidelines for the management of castrate resistant prostate cancer (CRPC)                                           | 2010-June                     |
| 681 | M   | Canadian Expert Panel on the Management of Anaphylaxis | Management of anaphylaxis in primary care: Canadian expert consensus recommendations                                 | 2010-June                     |



|     |   |                                                                                                                                                                         |                                                                                                                                                                                |                               |
|-----|---|-------------------------------------------------------------------------------------------------------------------------------------------------------------------------|--------------------------------------------------------------------------------------------------------------------------------------------------------------------------------|-------------------------------|
| 682 | P | Dietitians of Canada;<br>College of Family Physicians of Canada;<br>Community Health Nurses of Canada; Canadian Paediatric Society                                      | Promoting optimal monitoring of child growth in Canada: Using the new World Health Organization growth charts – Executive Summary                                              | 2010-June                     |
| 683 | R | Public Health Agency of Canada                                                                                                                                          | Recommendations on interferon gamma release assays for the diagnosis of latent tuberculosis infection - 2010 update                                                            | 2010-June                     |
| 684 | T | Alberta Health and Wellness                                                                                                                                             | Tuberculosis prevention and control guidelines for Alberta                                                                                                                     | 2010-June                     |
| 685 | V | Canadian Urological Association                                                                                                                                         | Vasectomy update 2010                                                                                                                                                          | 2010-June                     |
| 686 | V | Canadian Paediatric Society                                                                                                                                             | Vegetarian diets in children and adolescents                                                                                                                                   | 2010-June                     |
| 687 | L | Société canadienne de pédiatrie                                                                                                                                         | Les régimes végétariens chez les enfants et les adolescents                                                                                                                    | 2010-juin                     |
| 688 | P | Société des obstétriciens et gynécologues du Canada                                                                                                                     | Prévention des adhérences en chirurgie gynécologique                                                                                                                           | 2010-juin                     |
| 689 | P | Les diététistes du Canada;<br>Collège des médecins de famille du Canada;<br>Infirmières et Infirmiers en santé communautaire du Canada; Société canadienne de pédiatrie | Promouvoir la surveillance optimale de la croissance des enfants au Canada : L'utilisation des nouvelles courbes de croissance de l'Organisation mondiale de la santé – Résumé | 2010-juin                     |
| 690 | R | Agence de santé publique du Canada                                                                                                                                      | Recommandations sur les tests de libération d'interféron-gamma pour la détection de l'infection tuberculeuse latente – Mise à jour de 2010                                     | 2010-juin                     |
| 691 | T | Cancer Care Ontario's Program in Evidence-based Care                                                                                                                    | The treatment of locally advanced pancreatic cancer                                                                                                                            | 2004-Feb (Reviewed 2010-July) |
| 692 | A | Cancer Care Ontario's Program in Evidence-based Care                                                                                                                    | Adjuvant radiotherapy following radical prostatectomy for pathologic T3 or margin-positive prostate cancer : Updated guideline recommendations 2010                            | 2010-July-22                  |
| 693 | C | Canadian Collaboration for Immigrant and Refugee Health                                                                                                                 | Canadian guidelines for immigrant health - Common mental health problems in immigrants and refugees: general approach in primary care                                          | 2010-July                     |
| 694 | C | College of Physicians and Surgeons of Ontario                                                                                                                           | Clinical practice parameters and facility standards : Chronic kidney disease and dialysis                                                                                      | 2010-July                     |

|     |   |                                                       |                                                                                                                                                                |                                   |
|-----|---|-------------------------------------------------------|----------------------------------------------------------------------------------------------------------------------------------------------------------------|-----------------------------------|
| 695 | I | Canadian Paediatric Society                           | Inhalant abuse                                                                                                                                                 | 2010-July                         |
| 696 | L | Société canadienne de pédiatrie                       | L'abuse de substances volatiles                                                                                                                                | 2010-juill                        |
| 697 | A | Society of Obstetricians and Gynaecologists of Canada | Alcohol use and pregnancy consensus clinical guidelines                                                                                                        | 2010-Aug                          |
| 698 | S | Cancer Care Ontario's Program in Evidence-based Care  | Single-agent interleukin-2 in the treatment of metastatic melanoma : a clinical practice guideline                                                             | 2006-Mar-20 (Reviewed 2010-Aug-4) |
| 699 | C | Canadian Agency for Drugs and Technologies in Health  | CADTH therapeutic review panel recommendations: Third-line therapy for patients with type 2 diabetes inadequately controlled with metformin and a sulfonylurea | 2010-Aug                          |
| 700 | E | Canadian Paediatric Society                           | Emergency contraception                                                                                                                                        | 2010-Aug                          |
| 701 | E | Society of Obstetricians and Gynaecologists of Canada | Endometriosis: Diagnosis and management                                                                                                                        | 2010-Aug                          |
| 702 | E | Society of Obstetricians and Gynaecologists of Canada | Endometriosis: Diagnosis and management : Chapter 1: Introduction                                                                                              | 2010-Aug                          |
| 703 | E | Society of Obstetricians and Gynaecologists of Canada | Endometriosis: Diagnosis and management : Chapter 2: Pain management                                                                                           | 2010-Aug                          |
| 704 | E | Society of Obstetricians and Gynaecologists of Canada | Endometriosis: Diagnosis and management : Chapter 4: Surgical management of endometriosis                                                                      | 2010-Aug                          |
| 705 | E | Society of Obstetricians and Gynaecologists of Canada | Endometriosis: Diagnosis and management : Chapter 5: Surgical management of infertility associated with endometriosis                                          | 2010-Aug                          |
| 706 | E | Society of Obstetricians and Gynaecologists of Canada | Endometriosis: Diagnosis and management : Chapter 6: Medical treatment of infertility related to endometriosis                                                 | 2010-Aug                          |
| 707 | E | Society of Obstetricians and Gynaecologists of Canada | Endometriosis: Diagnosis and management : Chapter 7: Endometriosis in adolescents                                                                              | 2010-Aug                          |
| 708 | E | Society of Obstetricians and Gynaecologists of Canada | Endometriosis: Diagnosis and management : Chapter 8: Endometriosis and cancer                                                                                  | 2010-Aug                          |
| 709 | E | Society of Obstetricians and Gynaecologists of Canada | Endometriosis: Diagnosis and management: Chapter 3: Medical Management of pain associated with endometriosis                                                   | 2010-Aug                          |
| 710 | H | Ontario Association of Medical Laboratories           | Guideline for lipid testing in adults                                                                                                                          | 2010-Aug                          |

|     |   |                                                      |                                                                                                                                                          |           |
|-----|---|------------------------------------------------------|----------------------------------------------------------------------------------------------------------------------------------------------------------|-----------|
| 711 | M | Alberta Health Services - Cancer Care                | Medulloblastoma                                                                                                                                          | 2010-Aug  |
| 712 | O | Canadian Agency for Drugs and Technologies in Health | Optimal therapy recommendations for the prescribing and use of second-line therapy for patients with diabetes inadequately controlled on metformin       | 2010-Aug  |
| 713 | O | Canadian Thoracic Society                            | Optimizing pulmonary rehabilitation in chronic obstructive pulmonary disease - practical issues: A Canadian Thoracic Society clinical practice guideline | 2010-Aug  |
| 714 | D | Société des obstétriciens et gynécologues du Canada  | Directive clinique de consensus sur la consommation d'alcool et la grossesse                                                                             | 2010-août |
| 715 | E | Société des obstétriciens et gynécologues du Canada  | Endométriose : Diagnostic et prise en charge                                                                                                             | 2010-août |
| 716 | E | Société des obstétriciens et gynécologues du Canada  | Endométriose : Diagnostic et prise en charge : Chapitre 2 : Soulagement de la douleur                                                                    | 2010-août |
| 717 | E | Société des obstétriciens et gynécologues du Canada  | Endométriose : Diagnostic et prise en charge : Chapitre 3 : Prise en charge médicale de la douleur associée à l'endométriose                             | 2010-août |
| 718 | E | Société des obstétriciens et gynécologues du Canada  | Endométriose : Diagnostic et prise en charge : Chapitre 4 : Prise en charge chirurgicale de l'endométriose                                               | 2010-août |
| 719 | E | Société des obstétriciens et gynécologues du Canada  | Endométriose : Diagnostic et prise en charge : Chapitre 5 : Prise en charge chirurgicale de l'infertilité associée à l'endométriose                      | 2010-août |
| 720 | E | Société des obstétriciens et gynécologues du Canada  | Endométriose : Diagnostic et prise en charge : Chapitre 6: Prise en charge médicale de l'infertilité associée à l'endométriose                           | 2010-août |
| 721 | E | Société des obstétriciens et gynécologues du Canada  | Endométriose : Diagnostic et prise en charge : Chapitre 7: Endométriose chez les adolescentes                                                            | 2010-août |
| 722 | E | Société des obstétriciens et gynécologues du Canada  | Endométriose : Diagnostic et prise en charge : Chapitre 8: Endométriose et cancer                                                                        | 2010-août |
| 723 | E | Société des obstétriciens et gynécologues du Canada  | Endométriose: Diagnostic et prise en charge : Chapitre 1 : introduction                                                                                  | 2010-août |

|     |   |                                                                                                                          |                                                                                                                                                                   |                           |
|-----|---|--------------------------------------------------------------------------------------------------------------------------|-------------------------------------------------------------------------------------------------------------------------------------------------------------------|---------------------------|
| 724 | L | Société canadienne de pédiatrie                                                                                          | La contraception d'urgence                                                                                                                                        | 2010-août                 |
| 725 | C | Cancer Care Ontario's Program in Evidence-based Care                                                                     | Combined modality radiotherapy and chemotherapy in the non-surgical management of localized carcinoma of the esophagus                                            | 2005 (Reviewed 2010-Sept) |
| 726 | F | Guidelines and Protocols Advisory Committee (BC)                                                                         | Febrile seizures                                                                                                                                                  | 2010-Sept-1               |
| 727 | O | Guidelines and Protocols Advisory Committee (BC)                                                                         | Oral rehydration therapy (ORT) in children                                                                                                                        | 2010-Sept-1               |
| 728 | A | Société des obstétriciens et gynécologues du Canada                                                                      | Antibioprophylaxie dans le cadre d'interventions obstétricales                                                                                                    | 2010-sept                 |
| 729 | A | Society of Obstetricians and Gynaecologists of Canada                                                                    | Antibiotic prophylaxis in obstetric procedures                                                                                                                    | 2010-Sept                 |
| 730 | C | Canadian Sleep Society; Canadian Thoracic Society                                                                        | Canadian Sleep Society/Canadian Thoracic Society position paper on the use of portable monitoring for the diagnosis of obstructive sleep apnea/hypopnea in adults | 2010-Sept                 |
| 731 | D | Guidelines and Protocols Advisory Committee (BC)                                                                         | Diabetes care                                                                                                                                                     | 2010-Sept                 |
| 732 | D | Société des obstétriciens et gynécologues du Canada                                                                      | Directive clinique sur l'évaluation et la prise en charge de l'incontinence urinaire récurrente à la suite d'une chirurgie visant le plancher pelvien             | 2010-sept                 |
| 733 | E | Association des professeurs d'obstétrique et gynécologie du Canada; Société des obstétriciens et gynécologues du Canada  | Examens pelviens menés par des étudiants en médecine                                                                                                              | 2010-sept                 |
| 734 | H | Ontario Association of Medical Laboratories                                                                              | Guidelines for ordering diagnostic testing for viral hepatitis                                                                                                    | 2010-Sept                 |
| 735 | H | Society of Obstetricians and Gynaecologists of Canada                                                                    | Guidelines for the evaluation and treatment of recurrent urinary incontinence following pelvic floor surgery                                                      | 2010-Sept                 |
| 736 | P | Association of Professors of Obstetrics and Gynaecology of Canada; Society of Obstetricians and Gynaecologists of Canada | Pelvic examinations by medical students                                                                                                                           | 2010-Sept                 |

|     |   |                                                       |                                                                                          |                              |
|-----|---|-------------------------------------------------------|------------------------------------------------------------------------------------------|------------------------------|
| 737 | R | Comité consultatif national de l'immunisation         | Recommandations relatives à l'administration de deux doses du vaccin contre la varicelle | 2010-sept                    |
| 738 | U | Canadian Association of Radiologists                  | Ultrasound - Performing diagnostic obstetric ultrasound examinations                     | 2010-Sept                    |
| 739 | L | Société canadienne de pédiatrie                       | La prise en charge de la gale                                                            | 2001-déc (Reviewed 2010-oct) |
| 740 | S | Canadian Paediatric Society                           | Scabies management                                                                       | 2001-Dec (Reviewed 2010-Oct) |
| 741 | I | Cancer Care Ontario's Program in Evidence-based Care  | Invasive Mediastinal Staging of Non-small Cell Lung Cancer                               | 2010-Oct-18                  |
| 742 | V | Guidelines and Protocols Advisory Committee (BC)      | Vitamin D testing protocol                                                               | 2010-Oct-1                   |
| 743 | W | Guidelines and Protocols Advisory Committee (BC)      | Warfarin therapy - management during invasive procedures and surgery                     | 2010-Oct-1                   |
| 744 | W | Guidelines and Protocols Advisory Committee (BC)      | Warfarin therapy management                                                              | 2010-Oct-1                   |
| 745 | A | Society of Obstetricians and Gynaecologists of Canada | Asymptomatic endometrial thickening                                                      | 2010-Oct                     |
| 746 | D | Société canadienne de pédiatrie                       | Des recommandations quant à l'usage des vaccins antirotavirus chez les nourrissons       | 2010-oct                     |
| 747 | E | Société des obstétriciens et gynécologues du Canada   | Épaississement endométrial asymptomatique                                                | 2010-oct                     |
| 748 | H | Perinatal Services BC                                 | Gestational diabetes mellitus screening and diagnosis                                    | 2010-Oct                     |
| 749 | R | Canadian Paediatric Society                           | Recommendations for the use of rotavirus vaccines in infants                             | 2010-Oct                     |
| 750 | T | Cancer Care Ontario's Program in Evidence-based Care  | The role of IMRT in breast cancer                                                        | 2010-Oct                     |
| 751 | T | Cancer Care Ontario's Program in Evidence-based Care  | The role of IMRT in central nervous system cancer                                        | 2010-Oct                     |
| 752 | T | Cancer Care Ontario's Program in Evidence-based Care  | The role of IMRT in gastrointestinal cancers                                             | 2010-Oct                     |
| 753 | T | Cancer Care Ontario's Program in Evidence-based Care  | The role of IMRT in gynecologic cancers                                                  | 2010-Oct                     |
| 754 | T | Cancer Care Ontario's Program in Evidence-based Care  | The role of IMRT in prostate cancer                                                      | 2010-Oct                     |
| 755 | T | Cancer Care Ontario's Program in Evidence-based Care  | The role of IMRT in skin cancers                                                         | 2010-Oct                     |

|     |     |                                                       |                                                                                                                                             |                              |
|-----|-----|-------------------------------------------------------|---------------------------------------------------------------------------------------------------------------------------------------------|------------------------------|
| 756 | T   | Cancer Care Ontario's Program in Evidence-based Care  | The role of IMRT in soft-tissue sarcomas                                                                                                    | 2010-Oct                     |
| 757 | T   | Cancer Care Ontario's Program in Evidence-based Care  | The role of IMRT in thyroid cancers                                                                                                         | 2010-Oct                     |
| 758 | B   | Cancer Care Ontario's Program in Evidence-based Care  | Breast irradiation in women with early stage invasive breast cancer following breast conserving surgery                                     | 2002-Jan (Reviewed 2010-Nov) |
| 759 | 0-9 | Osteoporosis Canada                                   | 2010 clinical practice guidelines for the diagnosis and management of osteoporosis in Canada: Summary                                       | 2010-Nov-23                  |
| 760 | P   | Cancer Care Ontario's Program in Evidence-based Care  | Positron emission tomography in radiation treatment planning for lung cancer                                                                | 2010-Nov-17                  |
| 761 | I   | Société des obstétriciens et gynécologues du Canada   | Infection récurrente des voies urinaires                                                                                                    | 2010-nov                     |
| 762 | L   | Société canadienne de pédiatrie                       | Les banques de lait humain                                                                                                                  | 2010-nov                     |
| 763 | R   | Society of Obstetricians and Gynaecologists of Canada | Recurrent urinary tract infection                                                                                                           | 2010-Nov                     |
| 764 | S   | Cancer Care Ontario's Program in Evidence-based Care  | Surgical management of early-stage invasive breast cancer                                                                                   | 2003-Jan (Reviewed 2010-Nov) |
| 765 | T   | Cancer Care Ontario's Program in Evidence-based Care  | The role of IMRT in lung cancer                                                                                                             | 2010-Nov                     |
| 766 | E   | Registered Nurses' Association of Ontario             | Enhancing healthy adolescent development                                                                                                    | 2002 (Reviewed 2010-Dec)     |
| 767 | B   | Cancer Care Ontario's Program in Evidence-based Care  | Bevacizumab for the treatment of patients with glioblastoma multiforme that has relapsed or progressed following prior therapy              | 2010-Dec                     |
| 768 | C   | Canadian Association of Gastroenterology              | Canadian Association of Gastroenterology position statement on screening individuals at average risk for developing colorectal cancer: 2010 | 2010-Dec                     |
| 769 | C   | Canadian Expert Panel on Management of Hand Eczema    | Canadian hand dermatitis management guidelines                                                                                              | 2010-Dec                     |
| 770 | D   | Canadian Thoracic Society                             | Diagnostic evaluation and management of chronic thromboembolic pulmonary hypertension: A clinical practice guideline                        | 2010-Dec                     |
| 771 | N   | Perinatal Services BC                                 | Newborn screening                                                                                                                           | 2010-Dec                     |

|     |   |                                                                    |                                                                                                                 |                          |
|-----|---|--------------------------------------------------------------------|-----------------------------------------------------------------------------------------------------------------|--------------------------|
| 772 | O | Society of Obstetricians and Gynaecologists of Canada              | Oral contraceptives and the risk of venous thromboembolism: An update                                           | 2010-Dec                 |
| 773 | R | Help ELIminate Pain in KIDS                                        | Reducing the pain of childhood vaccination: an evidence-based clinical practice guideline                       | 2010-Dec                 |
| 774 | S | Toward Optimized Practice [Alberta]                                | Screening and early diagnosis of prostate cancer                                                                | 2010-Dec                 |
| 775 | S | Cancer Care Ontario's Program in Evidence-based Care               | Systemic therapy for advanced gastric cancer                                                                    | 2010-Dec                 |
| 776 | C | no listed author on CMA Infobase                                   | Canadian consensus guidelines for the optimal use of etravirine in the treatment of HIV-infected adults         | 2009                     |
| 777 | C | Canadian Psoriasis Guidelines Committee                            | Canadian guideline for the management of plaque psoriasis                                                       | 2009                     |
| 778 | H | Toward Optimized Practice [Alberta]                                | Guideline for red blood and plasma transfusion: A summary                                                       | 2009                     |
| 779 | L | Canadian Psoriasis Guidelines Committee                            | Lignes directrices canadiennes pour la prise en charge du psoriasis en plaques                                  | 2009                     |
| 780 | O | Association of Medical Microbiology and Infectious Disease Canada  | Optimal use of raltegravir (Isentress®) in the treatment of HIV-infected adults - Canadian consensus guidelines | 2009                     |
| 781 | H | Toward Optimized Practice [Alberta]                                | Guideline for the management of acute asthma in adults and children                                             | 2006-Oct (Reviewed 2009) |
| 782 | T | Public Health Agency of Canada                                     | The Canadian pandemic influenza plan for the health sector                                                      | 2006-Dec (Reviewed 2009) |
| 783 | H | Toward Optimized Practice [Alberta]                                | Guideline for management of modifiable risk factors in adults at high risk for cardiovascular events            | 2005-Feb (Reviewed 2009) |
| 784 | H | Toward Optimized Practice [Alberta]                                | Guideline for cognitive impairment : dementia - diagnosis to management                                         | 2002-Jan (Reviewed 2009) |
| 785 | A | L'Association des infirmières et infirmiers autorisés de l'Ontario | Administration de l'insuline par voie sous-cutané chez les adultes qui ont le diabète de type 2                 | 2004 (Reviewed 2009)     |
| 786 | B | Registered Nurses' Association of Ontario                          | Best practice guideline for the subcutaneous administration of insulin in adults with type 2 diabetes           | 2004 (Reviewed 2009)     |
| 787 | H | Toward Optimized Practice [Alberta]                                | Guideline for cognitive impairment : is this dementia? Symptoms to diagnosis                                    | 2007-Jan (Reviewed 2009) |

|     |   |                                                       |                                                                                                                                                                                                                                                 |                          |
|-----|---|-------------------------------------------------------|-------------------------------------------------------------------------------------------------------------------------------------------------------------------------------------------------------------------------------------------------|--------------------------|
| 788 | H | Toward Optimized Practice [Alberta]                   | Guideline for diagnosis and treatment of chronic undiagnosed dyspepsia in adults                                                                                                                                                                | 2007-Jan (Reviewed 2009) |
| 789 | H | Toward Optimized Practice [Alberta]                   | Guideline for surgical & non-surgical management of cataract in the otherwise healthy adult eye                                                                                                                                                 | 2007 (Reviewed 2009)     |
| 790 | H | Toward Optimized Practice [Alberta]                   | Guideline for treatment of gastroesophageal reflux disease (GERD) in adults                                                                                                                                                                     | 2007 (Reviewed 2009)     |
| 791 | H | Toward Optimized Practice [Alberta]                   | Guideline for treatment of Helicobacter pylori infection in adults                                                                                                                                                                              | 2007 (Reviewed 2009)     |
| 792 | I | Société des obstétriciens et gynécologues du Canada   | Immunisation pendant la grossesse                                                                                                                                                                                                               | 2008-déc (Reviewed 2009) |
| 793 | I | Society of Obstetricians and Gynaecologists of Canada | Immunization in pregnancy                                                                                                                                                                                                                       | 2008-Dec (Reviewed 2009) |
| 794 | R | Agence de santé publique du Canada                    | Recommandations mises à jour sur les tests de libération d'interféron-gamma pour la détection de l'infection tuberculeuse latente                                                                                                               | 2009-janv                |
| 795 | S | Cancer Care Ontario's Program in Evidence-based Care  | Stem cell transplantation in adults                                                                                                                                                                                                             | 2009-Jan-11              |
| 796 | A | Guidelines and Protocols Advisory Committee (BC)      | Ankle injury - X-ray for acute injury of the ankle or mid-foot                                                                                                                                                                                  | 2009-Jan                 |
| 797 | A | Registered Nurses' Association of Ontario             | Assessment and care of adults at risk for suicidal ideation and behaviour                                                                                                                                                                       | 2009-Jan                 |
| 798 | C | Canadian Cardiovascular Society                       | Canadian Cardiovascular Society Working Group: Providing a perspective on the 2007 focused update of the American College of Cardiology and American Heart Association 2004 guidelines for the management of ST elevation myocardial infarction | 2009-Jan                 |
| 799 | C | Canadian Association of Radiologists                  | CAR guidelines and standards for cardiac computed tomography                                                                                                                                                                                    | 2009-Jan                 |
| 800 | I | Provincial Blood Coordinating Office (BC)             | Intravenous immune globulin (IVIG) utilization management program guidelines                                                                                                                                                                    | 2009-Jan                 |
| 801 | M | Society of Obstetricians and Gynaecologists of Canada | Menopause and osteoporosis update 2009                                                                                                                                                                                                          | 2009-Jan                 |
| 802 | M | Society of Obstetricians and Gynaecologists of Canada | Menopause and osteoporosis update 2009: Chapter 1: Towards a healthier lifestyle                                                                                                                                                                | 2009-Jan                 |



|     |   |                                                       |                                                                                      |                               |
|-----|---|-------------------------------------------------------|--------------------------------------------------------------------------------------|-------------------------------|
| 803 | M | Society of Obstetricians and Gynaecologists of Canada | Menopause and osteoporosis update 2009: Chapter 2: Vasomotor symptoms                | 2009-Jan                      |
| 804 | M | Society of Obstetricians and Gynaecologists of Canada | Menopause and osteoporosis update 2009: Chapter 3: Cardiovascular disease (CVD)      | 2009-Jan                      |
| 805 | M | Society of Obstetricians and Gynaecologists of Canada | Menopause and osteoporosis update 2009: Chapter 4: Hormone therapy and breast cancer | 2009-Jan                      |
| 806 | M | Society of Obstetricians and Gynaecologists of Canada | Menopause and osteoporosis update 2009: Chapter 5: Urogenital health                 | 2009-Jan                      |
| 807 | M | Society of Obstetricians and Gynaecologists of Canada | Menopause and osteoporosis update 2009: Chapter 6: Mood, memory, and cognition       | 2009-Jan                      |
| 808 | M | Society of Obstetricians and Gynaecologists of Canada | Menopause and osteoporosis update 2009: Chapter 7: Bone health                       | 2009-Jan                      |
| 809 | P | Cancer Care Ontario's Program in Evidence-based Care  | PET imaging in brain cancer: recommendations                                         | 2009-Jan                      |
| 810 | P | Cancer Care Ontario's Program in Evidence-based Care  | PET imaging in cervical cancer                                                       | 2009-Jan                      |
| 811 | P | Cancer Care Ontario's Program in Evidence-based Care  | PET imaging in colorectal cancer: recommendations                                    | 2009-Jan                      |
| 812 | P | Cancer Care Ontario's Program in Evidence-based Care  | PET imaging in esophageal cancer                                                     | 2009-Jan                      |
| 813 | P | Cancer Care Ontario's Program in Evidence-based Care  | PET imaging in melanoma                                                              | 2009-Jan                      |
| 814 | P | Cancer Care Ontario's Program in Evidence-based Care  | PET imaging in ovarian cancer                                                        | 2009-Jan                      |
| 815 | P | Cancer Care Ontario's Program in Evidence-based Care  | PET imaging in pancreatic cancer                                                     | 2009-Jan                      |
| 816 | P | Cancer Care Ontario's Program in Evidence-based Care  | PET imaging in small cell lung cancer                                                | 2009-Jan                      |
| 817 | T | Thrombosis Interest Group of Canada                   | Thrombolytic therapy in children                                                     | 2005-July (Reviewed 2009-Jan) |
| 818 | A | Société canadienne de pédiatrie                       | Approche déontologique de l'examen génital de l'enfant                               | 1999-Janv (Reviewed 2009-fév) |
| 819 | E | Canadian Paediatric Society                           | Ethical approach to genital examination in children                                  | 1999-Jan (Reviewed 2009-Feb)  |
| 820 | C | British Columbia Cancer Agency                        | Cancer management guidelines                                                         | 1995 (Reviewed 2009-Feb)      |
| 821 | P | Cancer Care Ontario's Program in Evidence-based Care  | PET imaging in testicular cancer                                                     | 2009-Jan                      |

|     |     |                                                      |                                                                                                                                                                                                                             |                               |
|-----|-----|------------------------------------------------------|-----------------------------------------------------------------------------------------------------------------------------------------------------------------------------------------------------------------------------|-------------------------------|
| 822 | L   | Société canadienne de pédiatrie                      | Le dépistage des troubles de la vue chez les nourrissons, les enfants et les adolescents                                                                                                                                    | 2009-fév                      |
| 823 | 0-9 | Canadian Cardiovascular Society                      | 2009 Canadian Cardiovascular Society Consensus Conference guidelines on heart failure, update 2009: Diagnosis and management of right-sided heart failure, myocarditis, device therapy and recent important clinical trials | 2009-Feb                      |
| 824 | C   | Canadian Association of Radiologists                 | Canadian Association of Radiologists: Consensus guidelines and standards for cardiac CT                                                                                                                                     | 2009-Feb                      |
| 825 | D   | Thrombosis Interest Group of Canada                  | Duration of anticoagulant therapy for venous thromboembolism                                                                                                                                                                | 2009-Feb                      |
| 826 | O   | Thrombosis Interest Group of Canada                  | Overview of perioperative management of warfarin therapy                                                                                                                                                                    | 2009-Feb                      |
| 827 | T   | British Columbia Centre for Excellence in HIV/AIDS   | Therapeutic guidelines for HIV infected and HIV exposed children                                                                                                                                                            | 2009-Feb                      |
| 828 | T   | British Columbia Centre for Excellence in HIV/AIDS   | Therapeutic guidelines: accidental exposure guidelines                                                                                                                                                                      | 2009-Feb                      |
| 829 | V   | Canadian Paediatric Society                          | Vision screening in infants, children and youth                                                                                                                                                                             | 2009-Feb                      |
| 830 | T   | Société des obstétriciens et gynécologues du Canada  | Tenue systématique d'un examen échographique obstétrical au cours du deuxième trimestre: Contenu d'un examen et d'un rapport exhaustifs                                                                                     | 2009-mars                     |
| 831 | M   | Cancer Care Ontario's Program in Evidence-based Care | Management of squamous cell cancer of the anal canal                                                                                                                                                                        | 2009-Mar-31                   |
| 832 | H   | Cancer Care Ontario's Program in Evidence-based Care | Gastroscopy following a positive fecal occult blood test and negative colonoscopy                                                                                                                                           | 2009-Mar-30                   |
| 833 | T   | Thrombosis Interest Group of Canada                  | Traveller's thrombosis                                                                                                                                                                                                      | 2009-Mar-16                   |
| 834 | T   | Thrombosis Interest Group of Canada                  | Thrombolytic therapy in peripheral arterial disease                                                                                                                                                                         | 2005-July (Reviewed 2009-Mar) |
| 835 | C   | Canadian Association of Gastroenterology             | Canadian Association of Gastroenterology clinical practice guidelines: the use of tumour necrosis factor-alpha antagonist therapy in Crohn's disease                                                                        | 2009-Mar                      |

|     |   |                                                       |                                                                                                                            |                               |
|-----|---|-------------------------------------------------------|----------------------------------------------------------------------------------------------------------------------------|-------------------------------|
| 836 | C | College of Physicians and Surgeons of Ontario         | Clinical practice parameters and facility standards - Laser treatment of benign vascular lesions - 3rd edition, March 2009 | 2009-Mar                      |
| 837 | C | Society of Obstetricians and Gynaecologists of Canada | Content of a complete routine second trimester obstetrical ultrasound examination and report                               | 2009-Mar                      |
| 838 | I | Guidelines and Protocols Advisory Committee (BC)      | Infectious diarrhea - guideline for ordering stool specimens                                                               | 2009-Mar                      |
| 839 | T | Canadian Cardiovascular Society                       | The 'what, when, where, who and how?' of cardiac computed tomography in 2009: Guidelines for the clinician                 | 2009-Mar                      |
| 840 | V | Thrombosis Interest Group of Canada                   | VTE prophylaxis in major orthopedic surgery                                                                                | 2009-Mar                      |
| 841 | T | Thrombosis Interest Group of Canada                   | The antiphospholipid syndrome                                                                                              | 2004-June (Reviewed 2009-Mar) |
| 842 | C | Canadian Council of Motor Transport Administration    | CCMTA medical standards for drivers                                                                                        | 2004-July (Reviewed 2009-Mar) |
| 843 | C | Canadian Council of Motor Transport Administration    | CCMTA medical standards for drivers : cardiovascular diseases                                                              | 2004-July (Reviewed 2009-Mar) |
| 844 | C | Canadian Council of Motor Transport Administration    | CCMTA medical standards for drivers : cerebrovascular diseases                                                             | 2004-July (Reviewed 2009-Mar) |
| 845 | C | Canadian Council of Motor Transport Administration    | CCMTA medical standards for drivers : diseases of the nervous system                                                       | 2004-July (Reviewed 2009-Mar) |
| 846 | C | Canadian Council of Motor Transport Administration    | CCMTA medical standards for drivers : hearing                                                                              | 2004-July (Reviewed 2009-Mar) |
| 847 | C | Canadian Council of Motor Transport Administration    | CCMTA medical standards for drivers : metabolic diseases                                                                   | 2004-July (Reviewed 2009-Mar) |
| 848 | C | Canadian Council of Motor Transport Administration    | CCMTA medical standards for drivers : musculoskeletal disabilities                                                         | 2004-July (Reviewed 2009-Mar) |
| 849 | C | Canadian Council of Motor Transport Administration    | CCMTA medical standards for drivers : peripheral vascular diseases                                                         | 2004-July (Reviewed 2009-Mar) |
| 850 | I | Thrombosis Interest Group of Canada                   | Inferior vena cava filters                                                                                                 | 2004-Nov (Reviewed 2009-Mar)  |
| 851 | C | Canadian Council of Motor Transport Administration    | CCMTA medical standards for drivers : psychiatric disorders                                                                | 2004-July (Reviewed 2009-Mar) |
| 852 | C | Canadian Council of Motor Transport Administration    | CCMTA medical standards for drivers : renal disease                                                                        | 2004-July (Reviewed 2009-Mar) |
| 853 | C | Canadian Council of Motor Transport Administration    | CCMTA medical standards for drivers : respiratory diseases                                                                 | 2004-July (Reviewed 2009-Mar) |

|     |   |                                                       |                                                                                                                                               |                                 |
|-----|---|-------------------------------------------------------|-----------------------------------------------------------------------------------------------------------------------------------------------|---------------------------------|
| 854 | C | Canadian Council of Motor Transport Administration    | CCMTA medical standards for drivers : restraint system exemptions                                                                             | 2004-July (Reviewed 2009-Mar)   |
| 855 | C | Canadian Council of Motor Transport Administration    | CCMTA medical standards for drivers : the aging driver                                                                                        | 2004-July (Reviewed 2009-Mar)   |
| 856 | C | Canadian Council of Motor Transport Administration    | CCMTA medical standards for drivers : the effects of alcohol                                                                                  | 2004-July (Reviewed 2009-Mar)   |
| 857 | C | Canadian Council of Motor Transport Administration    | CCMTA medical standards for drivers : the effects of drugs                                                                                    | 2004-July (Reviewed 2009-Mar)   |
| 858 | C | Canadian Council of Motor Transport Administration    | CCMTA medical standards for drivers : vision                                                                                                  | 2004-July (Reviewed 2009-Mar)   |
| 859 | P | Guidelines and Protocols Advisory Committee (BC)      | Protocol for macroscopic and microscopic urinalysis and investigation of urinary tract infection                                              | 1998-Mar (Reviewed 2009-Apr)    |
| 860 | M | Guidelines and Protocols Advisory Committee (BC)      | Microscopic hematuria (persistent)                                                                                                            | 2004-June-1 (Reviewed 2009-Apr) |
| 861 | T | Cancer Care Ontario's Program in Evidence-based Care  | The use of inhibitors of angiogenesis in patients with inoperable locally advanced or metastatic renal cell cancer                            | 2009-Apr-30                     |
| 862 | S | Guidelines and Protocols Advisory Committee (BC)      | Stroke and transient ischemic attack – Management and prevention                                                                              | 2009-Apr-29                     |
| 863 | T | Cancer Care Ontario's Program in Evidence-based Care  | The use of bevacizumab in metastatic breast cancer                                                                                            | 2009-Apr-17                     |
| 864 | F | Cancer Care Ontario's Program in Evidence-based Care  | Follow-up for women after treatment for cervical cancer                                                                                       | 2009-Apr-13                     |
| 865 | C | Canadian Cardiovascular Society                       | Canadian Cardiovascular Society consensus conference update on cardiac transplantation 2008: executive summary                                | 2009-Apr                        |
| 866 | H | Thrombosis Interest Group of Canada                   | Guideline for using point of care INR monitoring of Warfarin therapy                                                                          | 2009-Apr                        |
| 867 | M | Society of Obstetricians and Gynaecologists of Canada | Management guidelines for obstetric patients and neonates born to mothers with suspected or Probable Severe Acute Respiratory Syndrome (SARS) | 2009-Apr                        |

|     |   |                                                                                         |                                                                                                                                                                                                                          |             |
|-----|---|-----------------------------------------------------------------------------------------|--------------------------------------------------------------------------------------------------------------------------------------------------------------------------------------------------------------------------|-------------|
| 868 | L | Société des obstétriciens et gynécologues du Canada                                     | Lignes directrices quant à la prise en charge des patientes en obstétrique chez lesquelles la présence du syndrome respiratoire aigu sévère (SRAS) est soupçonnée ou probable, et des nouveau-nés issus de ces patientes | 2009-avril  |
| 869 | P | Société des obstétriciens et gynécologues du Canada                                     | Prise en charge du méconium à la naissance                                                                                                                                                                               | 2009-avril  |
| 870 | M | Society of Obstetricians and Gynaecologists of Canada                                   | Management of meconium at birth                                                                                                                                                                                          | 2009-Apr    |
| 871 | I | Cancer Care Ontario's Program in Evidence-based Care                                    | Intraspinal techniques for pain management in cancer patients                                                                                                                                                            | 2009-May-5  |
| 872 | T | Cancer Care Ontario's Program in Evidence-based Care                                    | The management of head and neck cancer in Ontario: organizational and clinical practice guideline recommendations                                                                                                        | 2009-May-29 |
| 873 | I | Cancer Care Ontario's Program in Evidence-based Care                                    | Interferon-alfa in the treatment of patients with inoperable locally advanced or metastatic renal cell cancer                                                                                                            | 2009-May-12 |
| 874 | A | Canadian Association of Psychosocial Oncology; Canadian Partnership Against Cancer      | A Pan-Canadian clinical practice guideline: assessment of psychosocial health care needs of the adult cancer patient                                                                                                     | 2009-May    |
| 875 | C | International Conference on Concussion in Sport                                         | Consensus statement on concussion in sport: the 3rd International Conference on Concussion in Sport held in Zurich, November 2008                                                                                        | 2009-May    |
| 876 | O | Canadian Agency for Drugs and Technologies in Health                                    | Optimal therapy recommendations for the prescribing and use of insulin analogues                                                                                                                                         | 2009-May    |
| 877 | U | Public Health Agency of Canada                                                          | Use of antivirals to treat H1N1 flu virus (human swine flu)                                                                                                                                                              | 2009-May    |
| 878 | D | Collège des médecins du Québec                                                          | Douleur chronique et opioïdes : l'essentiel                                                                                                                                                                              | 2009-mai    |
| 879 | H | Association Canadienne d'Oncologie Psychosociale; Partenariat canadien contre le cancer | Guide pancanadien de pratique clinique : évaluation des besoins en soins psychosociaux du patient adulte atteint de cancer                                                                                               | 2009-mai    |
| 880 | L | Agence de santé publique du Canada                                                      | L'utilisation d'antiviraux pour combattre le virus H1N1 (grippe porcine chez l'être humain)                                                                                                                              | 2009-mai    |

|     |   |                                                                                           |                                                                                                                               |                                      |
|-----|---|-------------------------------------------------------------------------------------------|-------------------------------------------------------------------------------------------------------------------------------|--------------------------------------|
| 881 | S | Cancer Care Ontario's Program in Evidence-based Care                                      | Sunitinib malate for gastrointestinal stromal tumour (GIST) in imatinib mesylate resistant patients                           | 2009-June-9                          |
| 882 | L | Ordre des pharmaciens du Québec; Collège des médecins du Québec                           | La burprénorphine dans le traitement de la dépendance aux opioïdes                                                            | 2008-août (Reviewed 2009-juin)       |
| 883 | C | College of Physicians and Surgeons of Ontario                                             | Clinical practice parameters and facility standards - Hemodialysis – 3rd edition, November 2008                               | 2008-Nov (Reviewed 2009-June)        |
| 884 | C | Canadian Ophthalmological Society                                                         | Canadian Ophthalmological Society evidence-based clinical practice guidelines for the management of glaucoma in the adult eye | 2009-June                            |
| 885 | C | Canadian Urological Association                                                           | Canadian Urological Association guidelines on the management of renal cyst disease                                            | 2009-June                            |
| 886 | H | Canadian Urological Association                                                           | Guidelines on prostate biopsy methodology                                                                                     | 2009-June                            |
| 887 | M | Canadian Urological Association                                                           | Multicystic dysplastic kidney (MCDK) in the neonate: the role of the urologist                                                | 2009-June                            |
| 888 | V | Society of Obstetricians and Gynaecologists of Canada                                     | Vaginal delivery of breech presentation                                                                                       | 2009-June                            |
| 889 | S | Cancer Care Ontario's Program in Evidence-based Care                                      | Systemic adjuvant therapy for patients at high risk for recurrent melanoma                                                    | 2004-June-30 (Reviewed 2009-June-22) |
| 890 | W | Thrombosis Interest Group of Canada; Canadian Pediatric Thrombosis and Hemostasis Network | Warfarin in children                                                                                                          | 2009-June                            |
| 891 | A | Société des obstétriciens et gynécologues du Canada                                       | Accouchement du siège par voie vaginale                                                                                       | 2009-juin                            |
| 892 | D | Association des urologues du Canada                                                       | Dysplasie rénale multikystique (DRM) chez le nouveau-né : le rôle de l'urologue                                               | 2009-juin                            |
| 893 | E | Association des urologues du Canada                                                       | Exploration de l'azoospermie                                                                                                  | 2009-juin                            |
| 894 | H | Association des urologues du Canada                                                       | Guide de pratique canadien pour le traitement du cancer de la vessie sans envahissement musculaire                            | 2009-juin                            |
| 895 | H | Société canadienne d'ophtalmologie                                                        | Guide de pratique pour la prise en charge des kystes rénaux                                                                   | 2009-juin                            |
| 896 | H | Société canadienne d'ophtalmologie                                                        | Guide de pratique sur la méthodologie de la biopsie prostatique                                                               | 2009-juin                            |

|     |   |                                                                                                                                        |                                                                                                                                                                         |                                     |
|-----|---|----------------------------------------------------------------------------------------------------------------------------------------|-------------------------------------------------------------------------------------------------------------------------------------------------------------------------|-------------------------------------|
| 897 | H | Société canadienne d'ophtalmologie                                                                                                     | Guide factuel de pratique clinique de la Société canadienne d'ophtalmologie pour la gestion du glaucome chez l'adulte                                                   | 2009-juin                           |
| 898 | V | Agence de santé publique du Canada                                                                                                     | Virus de la grippe H1N1 Lignes directrices provisoires Le 15 juin 2009                                                                                                  | 2009-juin                           |
| 899 | L | Agence de santé publique du Canada                                                                                                     | Lignes directrices provisoires : Mesures de prévention et de contrôle des infections à l'intention des travailleurs de la santé dans les établissements de soins actifs | 2009-avril (Reviewed 2009-juill-28) |
| 900 | N | Registered Nurses' Association of Ontario                                                                                              | Nursing management of hypertension                                                                                                                                      | 2005-Oct (Reviewed 2009-July)       |
| 901 | I | Public Health Agency of Canada                                                                                                         | Interim Guidance: Infection prevention and control measures for health care workers in acute care facilities - human cases of swine influenza A (H1N1)                  | 2009-Apr (Reviewed 2009-July-28)    |
| 902 | S | Cancer Care Ontario's Program in Evidence-based Care                                                                                   | Sentinel lymph node biopsy in early-stage breast cancer                                                                                                                 | 2009-July-14                        |
| 903 | B | Canadian Association of Pathologists                                                                                                   | Best practice recommendations for standardization of immunohistochemistry tests (page 14-25)                                                                            | 2009-July                           |
| 904 | D | Registered Nurses' Association of Ontario                                                                                              | Decisional support for adults living with chronic kidney disease                                                                                                        | 2009-July                           |
| 905 | I | Society of Gynecologic Oncologists of Canada; Society of Canadian Colposcopists; Society of Obstetricians and Gynaecologists of Canada | Initial evaluation and referral guidelines for management of pelvic/ovarian masses                                                                                      | 2009-July                           |
| 906 | O | Canadian Agency for Drugs and Technologies in Health                                                                                   | Optimal therapy recommendations for the prescribing and use of blood glucose test strips                                                                                | 2009-July                           |
| 907 | S | Registered Nurses' Association of Ontario                                                                                              | Supporting clients on methadone maintenance treatment                                                                                                                   | 2009-July                           |
| 908 | L | L'Association des infirmières et infirmiers autorisés de l'Ontario                                                                     | Le soutien de la clientèle recevant des traitements d'entretien à la méthadone                                                                                          | 2009-juill                          |

|     |   |                                                                                                                                           |                                                                                                                                    |              |
|-----|---|-------------------------------------------------------------------------------------------------------------------------------------------|------------------------------------------------------------------------------------------------------------------------------------|--------------|
| 909 | P | Société des gynécologues oncologues du Canada; Société canadienne des colposcopistes; Société des obstétriciens et gynécologues du Canada | Prise en charge des masses pelviennes / ovariennes : évaluation initiale et lignes directrices quant à l'orientation des patientes | 2009-juill   |
| 910 | T | Cancer Care Ontario's Program in Evidence-based Care                                                                                      | The continued use of Trastuzumab beyond disease progression in patients with metastatic breast cancer                              | 2009-Aug-17  |
| 911 | H | Canadian Paediatric Society                                                                                                               | Guidelines for paediatric emergency equipment and supplies for a physician's office                                                | 2009-Aug     |
| 912 | H | Society of Obstetricians and Gynaecologists of Canada                                                                                     | Guidelines for the management of vasa previa                                                                                       | 2009-Aug     |
| 913 | M | Consensus Panel on Management of Dysfunctional Tear Syndrome                                                                              | Management of dysfunctional tear syndrome: a Canadian consensus                                                                    | 2009-Aug     |
| 914 | N | Canadian Paediatric Society                                                                                                               | Nutrition in neurologically impaired children                                                                                      | 2009-Aug     |
| 915 | O | Registered Nurses' Association of Ontario                                                                                                 | Ostomy care and management                                                                                                         | 2009-Aug     |
| 916 | P | Society of Obstetricians and Gynaecologists of Canada                                                                                     | Preimplantation genetic testing                                                                                                    | 2009-Aug     |
| 917 | D | Société des obstétriciens et gynécologues du Canada                                                                                       | Dépistage génétique préimplantatoire                                                                                               | 2009-août    |
| 918 | D | Société des obstétriciens et gynécologues du Canada                                                                                       | Directive clinique sur la prise en charge du vasa praevia                                                                          | 2009-août    |
| 919 | L | Société canadienne de pédiatrie                                                                                                           | L'alimentation des enfants ayant une déficience neurologique                                                                       | 2009-août    |
| 920 | L | Société canadienne de pédiatrie                                                                                                           | Les lignes directrices relatives au matériel et aux fournitures pédiatriques d'urgence au cabinet du médecin                       | 2009-août    |
| 921 | U | Canadian College of Medical Geneticists                                                                                                   | Use of array genomic hybridization technology in constitutional genetic diagnosis in Canada                                        | 2009-Sept-22 |
| 922 | A | Société des obstétriciens et gynécologues du Canada                                                                                       | Antibiothérapie et rupture prématurée des membranes préterme                                                                       | 2009-sept    |
| 923 | A | Society of Obstetricians and Gynaecologists of Canada                                                                                     | Antibiotic therapy in preterm premature rupture of the membranes                                                                   | 2009-Sept    |



|     |     |                                                       |                                                                                                                                                                                                                   |                              |
|-----|-----|-------------------------------------------------------|-------------------------------------------------------------------------------------------------------------------------------------------------------------------------------------------------------------------|------------------------------|
| 924 | E   | Société des obstétriciens et gynécologues du Canada   | Évaluation des anomalies congénitales structurelles diagnostiquées pendant la période prénatale                                                                                                                   | 2009-sept                    |
| 925 | E   | Society of Obstetricians and Gynaecologists of Canada | Evaluation of prenatally diagnosed structural congenital anomalies                                                                                                                                                | 2009-Sept                    |
| 926 | H   | Ontario Association of Medical Laboratories           | Guideline for folate testing                                                                                                                                                                                      | 2009-Sept                    |
| 927 | H   | Ontario Association of Medical Laboratories           | Guideline for reporting laboratory test results                                                                                                                                                                   | 2009-Sept                    |
| 928 | L   | Société canadienne de pédiatrie                       | La prise en charge de l'otite moyenne aiguë                                                                                                                                                                       | 2009-sept                    |
| 929 | M   | Canadian Paediatric Society                           | Management of acute otitis media                                                                                                                                                                                  | 2009-Sept                    |
| 930 | T   | Thrombosis Interest Group of Canada                   | TIGC guideline on the post-thrombotic syndrome                                                                                                                                                                    | 2008-Jan (Reviewed 2009-Oct) |
| 931 | 0-9 | Canadian Cardiovascular Society                       | 2009 Canadian Cardiovascular Society/Canadian guidelines for the diagnosis and treatment of dyslipidemia and prevention of cardiovascular disease in the adult – 2009 recommendations                             | 2009-Oct                     |
| 932 | A   | Society of Obstetricians and Gynaecologists of Canada | Active management of the third stage of labour: Prevention and treatment of postpartum hemorrhage                                                                                                                 | 2009-Oct                     |
| 933 | C   | Canadian Network for Mood and Anxiety Treatments      | Canadian Network for Mood and Anxiety Treatments (CANMAT) clinical guidelines for the management of major depressive disorder in adults                                                                           | 2009-Oct                     |
| 934 | C   | Canadian Network for Mood and Anxiety Treatments      | Canadian Network for Mood and Anxiety Treatments (CANMAT) clinical guidelines for the management of major depressive disorder in adults. I. Classification, burden and principles of management                   | 2009-Oct                     |
| 935 | C   | Canadian Network for Mood and Anxiety Treatments      | Canadian Network for Mood and Anxiety Treatments (CANMAT) clinical guidelines for the management of major depressive disorder in adults. II. Psychotherapy alone or in combination with antidepressant medication | 2009-Oct                     |
| 936 | C   | Canadian Network for Mood and Anxiety Treatments      | Canadian Network for Mood and Anxiety Treatments (CANMAT) clinical guidelines for the management of major depressive disorder in adults. III. Pharmacotherapy                                                     | 2009-Oct                     |

|     |   |                                                                                                                                    |                                                                                                                                                                                               |                                    |
|-----|---|------------------------------------------------------------------------------------------------------------------------------------|-----------------------------------------------------------------------------------------------------------------------------------------------------------------------------------------------|------------------------------------|
| 937 | C | Canadian Network for Mood and Anxiety Treatments                                                                                   | Canadian Network for Mood and Anxiety Treatments (CANMAT) clinical guidelines for the management of major depressive disorder in adults. IV. Neurostimulation therapies                       | 2009-Oct                           |
| 938 | C | Canadian Network for Mood and Anxiety Treatments                                                                                   | Canadian Network for Mood and Anxiety Treatments (CANMAT) clinical guidelines for the management of major depressive disorder in adults. V. Complementary and alternative medicine treatments | 2009-Oct                           |
| 939 | E | Thrombosis Interest Group of Canada                                                                                                | Establishing therapeutic range for heparin                                                                                                                                                    | 2009-Oct                           |
| 940 | L | Société canadienne de cardiologie                                                                                                  | Lignes directrices 2009 de la Société canadienne de cardiologie pour diagnostiquer et traiter la dyslipidémie et prévenir la maladie cardiovasculaire chez l'adulte - Recommandations de 2009 | 2009-oct                           |
| 941 | U | Collège des médecins du Québec                                                                                                     | Utilisation de la sédation-analgésie                                                                                                                                                          | 2009-oct                           |
| 942 | T | Cancer Care Ontario's Program in Evidence-based Care                                                                               | The delivery of brachytherapy for cervical cancer: Organizational and technical advice to facilitate high-quality care in Ontario                                                             | 2009-Nov-11                        |
| 943 | S | Alberta Health Services - Cancer Care                                                                                              | Sentinel lymph node biopsy and breast conservation surgery                                                                                                                                    | 2007-Jan (Reviewed 2009-Nov)       |
| 944 | E | Alberta Health Services - Cancer Care                                                                                              | Ependymomas                                                                                                                                                                                   | 2009-Nov                           |
| 945 | E | Canadian Paediatric Society                                                                                                        | Extended-release medications for children and adolescents with attention-deficit hyperactivity disorder                                                                                       | 2009-Nov                           |
| 946 | L | Société canadienne de pédiatrie                                                                                                    | Les médicaments à libération prolongée pour les enfants et les adolescents ayant un trouble de déficit de l'attention avec hyperactivité                                                      | 2009-nov                           |
| 947 | L | Société canadienne de cardiologie; Académie canadienne de psychiatrie de l'enfant et l'adolescent; Société canadienne de pédiatrie | L'évaluation du risque cardiaque avant l'utilisation de stimulants chez les enfants et les adolescents                                                                                        | 2009-nov                           |
| 948 | O | Guidelines and Protocols Advisory Committee (BC)                                                                                   | Osteoarthritis in peripheral joints - diagnosis and treatment                                                                                                                                 | 2008-Sept-15 (Reviewed 2009-Dec-1) |

|     |   |                                                                      |                                                                                                                                                             |                              |
|-----|---|----------------------------------------------------------------------|-------------------------------------------------------------------------------------------------------------------------------------------------------------|------------------------------|
| 949 | D | Guidelines and Protocols Advisory Committee (BC)                     | Dyspepsia with or without helicobacter pylori infection - Clinical approach in adults                                                                       | 2009-Dec-1                   |
| 950 | S | Société canadienne du rétinoblastome                                 | Stratégie thérapeutique du rétinoblastome guide clinique canadien                                                                                           | 2009-déc                     |
| 951 | D | Canadian Cardiovascular Society                                      | Dual antiplatelet therapy in patients requiring urgent coronary artery bypass grafting surgery: A position statement of the Canadian Cardiovascular Society | 2009-Dec                     |
| 952 | N | Canadian Retinoblastoma Society                                      | National retinoblastoma strategy Canadian guidelines for care                                                                                               | 2009-Dec                     |
| 953 | O | Alberta Health Services - Cancer Care                                | Optimal use of taxanes in metastatic breast cancer                                                                                                          | 2007-Dec (Reviewed 2009-Dec) |
| 954 | C | Canadian Urological Association                                      | Canadian guidelines for the management of asymptomatic microscopic hematuria in adults                                                                      | 2008                         |
| 955 | C | Champlain Cardiovascular Disease (CVD) Prevention Network            | Champlain primary care cardiovascular disease prevention and management guideline                                                                           | 2008                         |
| 956 | C | Canadian Dental Hygienists Association                               | Current issues in infection control practices in dental hygiene - Part 2                                                                                    | 2008                         |
| 957 | E | Canadian Academy of Sport and Exercise Medicine                      | Exercise and pregnancy                                                                                                                                      | 2008                         |
| 958 | H | Canadian Society of Nephrology                                       | Guidelines for the management of chronic kidney disease                                                                                                     | 2008                         |
| 959 | I | Canadian Dental Hygienists Association                               | Infection control practice guidelines in dental hygiene - Part 1                                                                                            | 2008                         |
| 960 | L | Association des urologues du Canada                                  | Lignes directrices canadiennes pour la prise en charge de l'hématurie microscopique asymptomatique chez les adultes                                         | 2008                         |
| 961 | P | Registered Nurses' Association of Ontario                            | Promoting asthma control in children - Supplement 2008                                                                                                      | 2008                         |
| 962 | R | Association pulmonaire du Canada; Société canadienne de thoracologie | Recommandations pour le diagnostic et le traitement de l'apnée du sommeil : mise à jour de 2008                                                             | 2008                         |
| 963 | R | Canadian Lung Association; Canadian Thoracic Society                 | Recommendations for the diagnosis and treatment of sleep apnea - 2008 update                                                                                | 2008                         |
| 964 | S | Alberta Cancer Board; Toward Optimized Practice [Alberta]            | Screening for colorectal cancer                                                                                                                             | 2008                         |

|     |   |                                           |                                                                                                                                                         |                              |
|-----|---|-------------------------------------------|---------------------------------------------------------------------------------------------------------------------------------------------------------|------------------------------|
| 965 | A | Registered Nurses' Association of Ontario | Assessment and device selection for vascular access                                                                                                     | 2004-May (Reviewed 2008)     |
| 966 | A | Registered Nurses' Association of Ontario | Assessment and device selection for vascular access - Supplement 2008                                                                                   | 2004-May (Reviewed 2008)     |
| 967 | P | Registered Nurses' Association of Ontario | Promoting asthma control in children                                                                                                                    | 2004-May (Reviewed 2008)     |
| 968 | C | Registered Nurses' Association of Ontario | Care and maintenance to reduce vascular access complications                                                                                            | 2005-Apr (Reviewed 2008)     |
| 969 | H | Toward Optimized Practice [Alberta]       | Guideline for the diagnosis and management of community acquired pneumonia : pediatric                                                                  | 2002-Feb (Reviewed 2008-Jan) |
| 970 | H | Toward Optimized Practice [Alberta]       | Guideline for the diagnosis and management of community acquired pneumonia: Adult                                                                       | 2002-Feb (Reviewed 2008-Jan) |
| 971 | H | Toward Optimized Practice [Alberta]       | Guideline for the diagnosis and management of acute bacterial sinusitis                                                                                 | 2006-Jan (Reviewed 2008-Jan) |
| 972 | H | Toward Optimized Practice [Alberta]       | Guideline for the use of prenatal ultrasound : first trimester                                                                                          | 2005-Jan (Reviewed 2008-Jan) |
| 973 | H | Toward Optimized Practice [Alberta]       | Guideline for ultrasound as part of routine prenatal care                                                                                               | 2005-Jan (Reviewed 2008-Jan) |
| 974 | H | Toward Optimized Practice [Alberta]       | Guideline for the diagnosis and management of acute otitis media in children                                                                            | 2007 (Reviewed 2008-Jan)     |
| 975 | H | Toward Optimized Practice [Alberta]       | Guideline for the diagnosis and management of croup                                                                                                     | 2007 (Reviewed 2008-Jan)     |
| 976 | H | Toward Optimized Practice [Alberta]       | Guideline for the diagnosis and management of nursing home acquired pneumonia (NHAP)                                                                    | 2007-Mar (Reviewed 2008-Jan) |
| 977 | L | Agence de santé publique du Canada        | Lignes directrices canadiennes sur les infections transmissibles sexuellement : abus sexuel à l'égard d'enfants impubères et prépubères                 | 2006 (Reviewed 2008-janv)    |
| 978 | L | Agence de santé publique du Canada        | Lignes directrices canadiennes sur les infections transmissibles sexuellement : Agression sexuelle chez les adolescents postpubères et chez les adultes | 2006 (Reviewed 2008-janv)    |
| 979 | L | Agence de santé publique du Canada        | Lignes directrices canadiennes sur les infections transmissibles sexuellement : Atteintes inflammatoires pelviennes (AIP)                               | 2006 (Reviewed 2008-janv)    |
| 980 | L | Agence de santé publique du Canada        | Lignes directrices canadiennes sur les infections transmissibles sexuellement : Chancre mou                                                             | 2006 (Reviewed 2008-janv)    |

|     |   |                                    |                                                                                                                                                                                                        |                           |
|-----|---|------------------------------------|--------------------------------------------------------------------------------------------------------------------------------------------------------------------------------------------------------|---------------------------|
| 981 | L | Agence de santé publique du Canada | Lignes directrices canadiennes sur les infections transmissibles sexuellement : Consommation de substances psychoactives                                                                               | 2006 (Reviewed 2008-janv) |
| 982 | L | Agence de santé publique du Canada | Lignes directrices canadiennes sur les infections transmissibles sexuellement : Détenus et délinquants                                                                                                 | 2006 (Reviewed 2008-janv) |
| 983 | L | Agence de santé publique du Canada | Lignes directrices canadiennes sur les infections transmissibles sexuellement : diagnostic en laboratoire des infections transmissibles sexuellement                                                   | 2006 (Reviewed 2008-janv) |
| 984 | L | Agence de santé publique du Canada | Lignes directrices canadiennes sur les infections transmissibles sexuellement : Épididymite                                                                                                            | 2006 (Reviewed 2008-janv) |
| 985 | L | Agence de santé publique du Canada | Lignes directrices canadiennes sur les infections transmissibles sexuellement : Femmes enceintes                                                                                                       | 2006 (Reviewed 2008-janv) |
| 986 | L | Agence de santé publique du Canada | Lignes directrices canadiennes sur les infections transmissibles sexuellement : Hommes ayant des relations sexuelles avec d'autres hommes et femmes ayant des relations sexuelles avec d'autres femmes | 2006 (Reviewed 2008-janv) |
| 987 | L | Agence de santé publique du Canada | Lignes directrices canadiennes sur les infections transmissibles sexuellement : Immigrants et réfugiés                                                                                                 | 2006 (Reviewed 2008-janv) |
| 988 | L | Agence de santé publique du Canada | Lignes directrices canadiennes sur les infections transmissibles sexuellement : Infections à Chlamydia                                                                                                 | 2006 (Reviewed 2008-janv) |
| 989 | L | Agence de santé publique du Canada | Lignes directrices canadiennes sur les infections transmissibles sexuellement : Infections au virus de l'hépatite B                                                                                    | 2006 (Reviewed 2008-janv) |
| 990 | L | Agence de santé publique du Canada | Lignes directrices canadiennes sur les infections transmissibles sexuellement : Infections au virus de l'immunodéficience humaine                                                                      | 2006 (Reviewed 2008-janv) |
| 991 | L | Agence de santé publique du Canada | Lignes directrices canadiennes sur les infections transmissibles sexuellement : Infections génitales au virus du papillome humain (VPH)                                                                | 2006 (Reviewed 2008-janv) |

|      |   |                                    |                                                                                                                                                                 |                           |
|------|---|------------------------------------|-----------------------------------------------------------------------------------------------------------------------------------------------------------------|---------------------------|
| 992  | L | Agence de santé publique du Canada | Lignes directrices canadiennes sur les infections transmissibles sexuellement : Infections génitales au virus herpes simplex (VHS)                              | 2006 (Reviewed 2008-janv) |
| 993  | L | Agence de santé publique du Canada | Lignes directrices canadiennes sur les infections transmissibles sexuellement : Infections intestinales et entériques transmissibles sexuellement               | 2006 (Reviewed 2008-janv) |
| 994  | L | Agence de santé publique du Canada | Lignes directrices canadiennes sur les infections transmissibles sexuellement : Infestations ectoparasitaires (pédiculose pubienne, gale)                       | 2006 (Reviewed 2008-janv) |
| 995  | L | Agence de santé publique du Canada | Lignes directrices canadiennes sur les infections transmissibles sexuellement : Les travailleurs de l'industrie du sexe                                         | 2006 (Reviewed 2008-janv) |
| 996  | L | Agence de santé publique du Canada | Lignes directrices canadiennes sur les infections transmissibles sexuellement : Lymphogranulomatose vénérienne (LGV)                                            | 2006 (Reviewed 2008-janv) |
| 997  | L | Agence de santé publique du Canada | Lignes directrices canadiennes sur les infections transmissibles sexuellement : Pertes vaginales (vaginose bactérienne, candidose vulvo-vaginale, trichomonase) | 2006 (Reviewed 2008-janv) |
| 998  | L | Agence de santé publique du Canada | Lignes directrices canadiennes sur les infections transmissibles sexuellement : Prise en charge des ITS en fonction du syndrome présenté                        | 2006 (Reviewed 2008-janv) |
| 999  | L | Agence de santé publique du Canada | Lignes directrices canadiennes sur les infections transmissibles sexuellement : Prostatite                                                                      | 2006 (Reviewed 2008-janv) |
| 1000 | L | Agence de santé publique du Canada | Lignes directrices canadiennes sur les infections transmissibles sexuellement : Soins primaires et infections transmissibles sexuellement                       | 2006 (Reviewed 2008-janv) |
| 1001 | L | Agence de santé publique du Canada | Lignes directrices canadiennes sur les infections transmissibles sexuellement : Ulcérations génitales (UG)                                                      | 2006 (Reviewed 2008-janv) |
| 1002 | L | Agence de santé publique du Canada | Lignes directrices canadiennes sur les infections transmissibles sexuellement : Urétrite                                                                        | 2006 (Reviewed 2008-janv) |

|      |   |                                    |                                                                                                                               |                           |
|------|---|------------------------------------|-------------------------------------------------------------------------------------------------------------------------------|---------------------------|
| 1003 | L | Agence de santé publique du Canada | Lignes directrices canadiennes sur les infections transmissibles sexuellement : Voyageurs                                     | 2006 (Reviewed 2008-janv) |
| 1004 | C | Public Health Agency of Canada     | Canadian guidelines on sexually transmitted infections : Chancroid                                                            | 2006 (Reviewed 2008-Jan)  |
| 1005 | C | Public Health Agency of Canada     | Canadian guidelines on sexually transmitted infections : Chlamydial infections                                                | 2006 (Reviewed 2008-Jan)  |
| 1006 | C | Public Health Agency of Canada     | Canadian guidelines on sexually transmitted infections : Ectoparasitic infestations (pubic lice, scabies)                     | 2006 (Reviewed 2008-Jan)  |
| 1007 | C | Public Health Agency of Canada     | Canadian guidelines on sexually transmitted infections : Epididymitis                                                         | 2006 (Reviewed 2008-Jan)  |
| 1008 | C | Public Health Agency of Canada     | Canadian guidelines on sexually transmitted infections : Genital herpes simplex virus (HSV) infections                        | 2006 (Reviewed 2008-Jan)  |
| 1009 | C | Public Health Agency of Canada     | Canadian guidelines on sexually transmitted infections : Genital human papillomavirus (HPV) infections                        | 2006 (Reviewed 2008-Jan)  |
| 1010 | C | Public Health Agency of Canada     | Canadian guidelines on sexually transmitted infections : Genital ulcer disease (GUD)                                          | 2006 (Reviewed 2008-Jan)  |
| 1011 | C | Public Health Agency of Canada     | Canadian guidelines on sexually transmitted infections : Hepatitis B virus infections                                         | 2006 (Reviewed 2008-Jan)  |
| 1012 | C | Public Health Agency of Canada     | Canadian guidelines on sexually transmitted infections : Human immunodeficiency virus (HIV) infections                        | 2006 (Reviewed 2008-Jan)  |
| 1013 | C | Public Health Agency of Canada     | Canadian guidelines on sexually transmitted infections : Immigrants and refugees                                              | 2006 (Reviewed 2008-Jan)  |
| 1014 | C | Public Health Agency of Canada     | Canadian guidelines on sexually transmitted infections : Inmates and offenders                                                | 2006 (Reviewed 2008-Jan)  |
| 1015 | C | Public Health Agency of Canada     | Canadian guidelines on sexually transmitted infections : Laboratory diagnosis of sexually transmitted infections              | 2006 (Reviewed 2008-Jan)  |
| 1016 | C | Public Health Agency of Canada     | Canadian guidelines on sexually transmitted infections : Lymphogranuloma venereum (LGV)                                       | 2006 (Reviewed 2008-Jan)  |
| 1017 | C | Public Health Agency of Canada     | Canadian guidelines on sexually transmitted infections : Men who have sex with men (MSM)/ women who have sex with women (WSW) | 2006 (Reviewed 2008-Jan)  |

|      |   |                                     |                                                                                                                                            |                          |
|------|---|-------------------------------------|--------------------------------------------------------------------------------------------------------------------------------------------|--------------------------|
| 1018 | C | Public Health Agency of Canada      | Canadian guidelines on sexually transmitted infections : Pelvic inflammatory disease (PID)                                                 | 2006 (Reviewed 2008-Jan) |
| 1019 | C | Public Health Agency of Canada      | Canadian guidelines on sexually transmitted infections : Pregnancy                                                                         | 2006 (Reviewed 2008-Jan) |
| 1020 | C | Public Health Agency of Canada      | Canadian guidelines on sexually transmitted infections : Primary care and sexually transmitted infections                                  | 2006 (Reviewed 2008-Jan) |
| 1021 | C | Public Health Agency of Canada      | Canadian guidelines on sexually transmitted infections : Prostatitis                                                                       | 2006 (Reviewed 2008-Jan) |
| 1022 | C | Public Health Agency of Canada      | Canadian guidelines on sexually transmitted infections : Sex workers                                                                       | 2006 (Reviewed 2008-Jan) |
| 1023 | C | Public Health Agency of Canada      | Canadian guidelines on sexually transmitted infections : sexual abuse in peripubertal and prepubertal children                             | 2006 (Reviewed 2008-Jan) |
| 1024 | C | Public Health Agency of Canada      | Canadian guidelines on sexually transmitted infections : Sexual assault in postpubertal adolescents and adults                             | 2006 (Reviewed 2008-Jan) |
| 1025 | C | Public Health Agency of Canada      | Canadian guidelines on sexually transmitted infections : Sexually transmitted intestinal and enteric infections                            | 2006 (Reviewed 2008-Jan) |
| 1026 | C | Public Health Agency of Canada      | Canadian guidelines on sexually transmitted infections : Substance use                                                                     | 2006 (Reviewed 2008-Jan) |
| 1027 | C | Public Health Agency of Canada      | Canadian guidelines on sexually transmitted infections : Syndromic management of sexually transmitted infections                           | 2006 (Reviewed 2008-Jan) |
| 1028 | C | Public Health Agency of Canada      | Canadian guidelines on sexually transmitted infections : Travellers                                                                        | 2006 (Reviewed 2008-Jan) |
| 1029 | C | Public Health Agency of Canada      | Canadian guidelines on sexually transmitted infections : Urethritis                                                                        | 2006 (Reviewed 2008-Jan) |
| 1030 | C | Public Health Agency of Canada      | Canadian guidelines on sexually transmitted infections : Vaginal discharge (bacterial vaginosis, vulvovaginal candidiasis, trichomoniasis) | 2006 (Reviewed 2008-Jan) |
| 1031 | H | Toward Optimized Practice [Alberta] | Guideline for the diagnosis and treatment of acute pharyngitis                                                                             | 2006 (Reviewed 2008-Jan) |
| 1032 | H | Toward Optimized Practice [Alberta] | Guideline for the management of acute bronchitis                                                                                           | 2006 (Reviewed 2008-Jan) |
| 1033 | L | Toward Optimized Practice [Alberta] | Laboratory endocrine testing guidelines : Acromegaly                                                                                       | 2006 (Reviewed 2008-Jan) |



|      |   |                                                                                              |                                                                                                                                                                                                                                           |                          |
|------|---|----------------------------------------------------------------------------------------------|-------------------------------------------------------------------------------------------------------------------------------------------------------------------------------------------------------------------------------------------|--------------------------|
| 1034 | L | Toward Optimized Practice [Alberta]                                                          | Laboratory endocrine testing guidelines : Adrenal Insufficiency (Addison's Disease)                                                                                                                                                       | 2006 (Reviewed 2008-Jan) |
| 1035 | L | Toward Optimized Practice [Alberta]                                                          | Laboratory endocrine testing guidelines : Cushing's syndrome                                                                                                                                                                              | 2006 (Reviewed 2008-Jan) |
| 1036 | L | Toward Optimized Practice [Alberta]                                                          | Laboratory endocrine testing guidelines : Galactorrhea                                                                                                                                                                                    | 2006 (Reviewed 2008-Jan) |
| 1037 | L | Toward Optimized Practice [Alberta]                                                          | Laboratory endocrine testing guidelines : Hypercalcemia                                                                                                                                                                                   | 2006 (Reviewed 2008-Jan) |
| 1038 | L | Toward Optimized Practice [Alberta]                                                          | Laboratory endocrine testing guidelines : Hypoglycemia                                                                                                                                                                                    | 2006 (Reviewed 2008-Jan) |
| 1039 | L | Toward Optimized Practice [Alberta]                                                          | Laboratory endocrine testing guidelines : Pheochromocytoma                                                                                                                                                                                | 2006 (Reviewed 2008-Jan) |
| 1040 | L | Toward Optimized Practice [Alberta]                                                          | Laboratory endocrine testing guidelines: Gonadal disorders : hirsutism                                                                                                                                                                    | 2006 (Reviewed 2008-Jan) |
| 1041 | U | Société des obstétriciens et gynécologues du Canada                                          | Utilisation de progestérone pour la prévention de l'accouchement prématuré                                                                                                                                                                | 2008-janv                |
| 1042 | M | Cancer Care Ontario's Program in Evidence-based Care                                         | Management of stage I seminoma : Guideline recommendations                                                                                                                                                                                | 2008-Jan-30              |
| 1043 | D | Canadian Consensus Conference on the Diagnosis and Treatment of Dementia                     | Diagnosis and treatment of dementia : introduction : introducing a series based on the Third Canadian Consensus Conference on the Diagnosis and Treatment of Dementia                                                                     | 2008-Jan-29              |
| 1044 | T | Cancer Care Ontario's Program in Evidence-based Care                                         | The management of malignant thrombocytosis in Philadelphia chromosome-negative myeloproliferative disease : Guideline recommendations                                                                                                     | 2008-Jan-15              |
| 1045 | C | Canadian Cardiovascular Society                                                              | Canadian Cardiovascular Society consensus conference guidelines on heart failure - 2008 update: Best practices for the transition of care of heart failure patients, and the recognition, investigation and treatment of cardiomyopathies | 2008-Jan                 |
| 1046 | C | Association of Medical Microbiology and Infectious Disease Canada; Canadian Thoracic Society | Clinical practice guidelines for hospital-acquired pneumonia and ventilator-associated pneumonia in adults                                                                                                                                | 2008-Jan                 |
| 1047 | T | Society of Obstetricians and Gynaecologists of Canada                                        | The use of progesterone for prevention of preterm birth                                                                                                                                                                                   | 2008-Jan                 |

|      |   |                                                                          |                                                                                                                                                                                                          |                                    |
|------|---|--------------------------------------------------------------------------|----------------------------------------------------------------------------------------------------------------------------------------------------------------------------------------------------------|------------------------------------|
| 1048 | L | Société canadienne de pédiatrie                                          | Lignes directrices multidisciplinaires sur la détermination, l'enquête et la prise en charge des cas présumés de traumatisme crânien non accidentel                                                      | 2008-fév                           |
| 1049 | T | Toward Optimized Practice [Alberta]                                      | The medical induction of labour                                                                                                                                                                          | 2006-Jan (Reviewed 2008-Feb)       |
| 1050 | R | Société canadienne de thoracologie                                       | Recommandations de la Société canadienne de thoracologie au sujet de la prise en charge de la maladie pulmonaire obstructive chronique - mise à jour de 2008 - points saillants pour les soins primaires | 2008-fév                           |
| 1051 | R | Société des obstétriciens et gynécologues du Canada                      | Rubéole au cours de la grossesse                                                                                                                                                                         | 2008-fév                           |
| 1052 | D | Canadian Consensus Conference on the Diagnosis and Treatment of Dementia | Diagnosis and treatment of dementia : 1. Risk assessment and primary prevention of Alzheimer disease                                                                                                     | 2008-Feb-26                        |
| 1053 | M | Cancer Care Ontario's Program in Evidence-based Care                     | Management of stage I nonseminomatous testicular cancer                                                                                                                                                  | 2008-Feb-14                        |
| 1054 | C | Canadian Thoracic Society                                                | Canadian Thoracic Society recommendations for the management of chronic obstructive pulmonary disease - 2008 update - highlights for primary care                                                        | 2008-Feb                           |
| 1055 | C | Saskatchewan Health                                                      | Clinical practice guidelines for the prevention and management of diabetes foot complications                                                                                                            | 2008-Feb                           |
| 1056 | M | Canadian Paediatric Society                                              | Multidisciplinary guidelines on the identification, investigation and management of suspected abusive head trauma                                                                                        | 2008-Feb                           |
| 1057 | T | Cancer Care Ontario's Program in Evidence-based Care                     | The role of aromatase inhibitors in adjuvant therapy for postmenopausal women with hormone receptor-positive breast cancer: a clinical practice guideline                                                | 2005-Oct-25 (Reviewed 2008-Feb-26) |
| 1058 | R | Society of Obstetricians and Gynaecologists of Canada                    | Rubella in pregnancy                                                                                                                                                                                     | 2008-Feb                           |
| 1059 | L | Toward Optimized Practice [Alberta]                                      | Laboratory endocrine testing guidelines: Amenorrhea (without hirsutism) and menopause                                                                                                                    | 2006 (Reviewed 2008-Mar)           |

|      |   |                                                                                   |                                                                                                                                                    |                          |
|------|---|-----------------------------------------------------------------------------------|----------------------------------------------------------------------------------------------------------------------------------------------------|--------------------------|
| 1060 | R | Association canadienne des médecins d'urgence                                     | Révision des lignes directrices de l'échelle canadienne de triage et de gravité (ÉTG) pour les adultes                                             | 2008-mars                |
| 1061 | D | Canadian Consensus Conference on the Diagnosis and Treatment of Dementia          | Diagnosis and treatment of dementia : 2. Diagnosis                                                                                                 | 2008-Mar-25              |
| 1062 | P | Cancer Care Ontario's Program in Evidence-based Care                              | Provider-patient communication : a report of evidence-based recommendations to guide practice in cancer                                            | 2008-Mar-17              |
| 1063 | I | Toward Optimized Practice [Alberta]                                               | Investigation and management of primary thyroid dysfunction                                                                                        | 2007 (Reviewed 2008-Mar) |
| 1064 | D | Society of Obstetricians and Gynaecologists of Canada                             | Diagnosis, evaluation and management of the hypertensive disorders of pregnancy                                                                    | 2008-Mar                 |
| 1065 | D | Society of Obstetricians and Gynaecologists of Canada                             | Diagnosis, evaluation and management of the hypertensive disorders of pregnancy - Chapter 1: Diagnosis and classification                          | 2008-Mar                 |
| 1066 | D | Society of Obstetricians and Gynaecologists of Canada                             | Diagnosis, evaluation and management of the hypertensive disorders of pregnancy - Chapter 2: Prediction, prevention, and prognosis of preeclampsia | 2008-Mar                 |
| 1067 | D | Society of Obstetricians and Gynaecologists of Canada                             | Diagnosis, evaluation and management of the hypertensive disorders of pregnancy - Chapter 3: Treatment of the hypertensive disorders of pregnancy  | 2008-Mar                 |
| 1068 | H | BC Oral Cancer Prevention Program; College of Dental Surgeons of British Columbia | Guideline for the early detection of oral cancer in British Columbia                                                                               | 2008-Mar                 |
| 1069 | R | Canadian Association of Emergency Physicians                                      | Revisions to the Canadian emergency department triage and acuity scale (CTAS) adult guidelines                                                     | 2008-Mar                 |
| 1070 | L | Société canadienne de pédiatrie                                                   | Le transport des nourrissons et des enfants dans les véhicules automobiles                                                                         | 2008-avril               |
| 1071 | M | Society of Obstetricians and Gynaecologists of Canada                             | Midurethral minimally invasive sling procedures for stress urinary incontinence                                                                    | 2008-Aug                 |
| 1072 | S | Society of Obstetricians and Gynaecologists of Canada                             | Screening and management of bacterial vaginosis in pregnancy                                                                                       | 2008-Aug                 |

|      |   |                                                                          |                                                                                                                                                                 |                                    |
|------|---|--------------------------------------------------------------------------|-----------------------------------------------------------------------------------------------------------------------------------------------------------------|------------------------------------|
| 1073 | S | Society of Obstetricians and Gynaecologists of Canada                    | SOGC committee opinion on urodynamics testing                                                                                                                   | 2008-Aug                           |
| 1074 | A | Cancer Care Ontario's Program in Evidence-based Care                     | Adjuvant systemic chemotherapy for stage II and III colon cancer following complete resection                                                                   | 2008-Apr-17                        |
| 1075 | O | Cancer Care Ontario's Program in Evidence-based Care                     | Optimization of surgical and pathological quality performance in radical surgery for colon and rectal cancer: margins and lymph nodes guideline recommendations | 2008-Apr-17                        |
| 1076 | A | Genito-Urinary Radiation Oncologists of Canada                           | Adjuvant radiotherapy following radical prostatectomy: Genito-Urinary Radiation Oncologists of Canada Consensus Statement                                       | 2008-Apr                           |
| 1077 | B | Consensus Panel on Management of Patients with Blepharitis               | Blepharitis : current strategies for diagnosis and management                                                                                                   | 2008-Apr                           |
| 1078 | C | Registered Nurses' Association of Ontario                                | Care and maintenance to reduce vascular access complications - Supplement 2008                                                                                  | 2008-Apr                           |
| 1079 | C | College of Physicians and Surgeons of Ontario                            | Clinical Practice Parameters and Facility Standards - Pulmonary function studies - 3rd edition, April 2008                                                      | 2008-Apr                           |
| 1080 | C | College of Physicians and Surgeons of Ontario                            | Clinical Practice Parameters and Facility Standards - Diagnostic spirometry & flow volume loop studies - 3rd edition, April 2008                                | 2008-Apr                           |
| 1081 | H | Society of Obstetricians and Gynaecologists of Canada                    | Genital herpes: gynaecological aspects                                                                                                                          | 2008-Apr                           |
| 1082 | T | Canadian Paediatric Society                                              | Transportation of infants and children in motor vehicles                                                                                                        | 2008-Apr                           |
| 1083 | D | Canadian Consensus Conference on the Diagnosis and Treatment of Dementia | Diagnosis and treatment of dementia : 3. Mild cognitive impairment and cognitive impairment without dementia                                                    | 2008-May-6                         |
| 1084 | R | Canadian Association of Emergency Physicians                             | Revisions to the Canadian triage and acuity scale paediatric guidelines (PaedCTAS)                                                                              | 2008-May                           |
| 1085 | R | Association canadienne des médecins d'urgence                            | Révision des lignes directrices de l'échelle canadienne de triage et de gravité (ÉTG) applicable aux enfants                                                    | 2008-mai                           |
| 1086 | P | Cancer Care Ontario's Program in Evidence-based Care                     | Preoperative or postoperative therapy for resectable esophageal cancer : guideline recommendations                                                              | 2005-Apr-13 (Reviewed 2008-May-21) |

|      |   |                                                       |                                                                                                                                                            |                                    |
|------|---|-------------------------------------------------------|------------------------------------------------------------------------------------------------------------------------------------------------------------|------------------------------------|
| 1087 | T | Cancer Care Ontario's Program in Evidence-based Care  | The role of Bevacizumab (Avastin®) combined with chemotherapy in the treatment of patients with advanced colorectal cancer : a clinical practice guideline | 2005-Dec-12 (Reviewed 2008-May-28) |
| 1088 | D | Association des urologues du Canada                   | Dépistage et prise en charge d'une hydronéphrose anténatale                                                                                                | 2008-juin                          |
| 1089 | D | Société des obstétriciens et gynécologues du Canada   | Directive clinique sur la prise en charge du virus de l'herpès simplex pendant la grossesse                                                                | 2008-juin                          |
| 1090 | L | Association des urologues du Canada                   | Lignes directrices pour le suivi après une néphrectomie radicale ou partielle en raison d'un hypernéphrome localisé de stade avancé                        | 2008-juin                          |
| 1091 | F | Canadian Urological Association                       | Follow-up guidelines after radical or partial nephrectomy for localized and locally advanced renal cell carcinoma                                          | 2008-June                          |
| 1092 | H | Ontario Association of Medical Laboratories           | Guideline for ordering serum levels of gonadotropins (FSH, LH) and prolactin                                                                               | 2008-June                          |
| 1093 | H | Provincial Blood Coordinating Office (BC)             | Guidelines for blood component substitution for adult patients during an inventory shortage - adult patients                                               | 2008-June                          |
| 1094 | H | Society of Obstetricians and Gynaecologists of Canada | Guidelines for the management of herpes simplex virus in pregnancy                                                                                         | 2008-June                          |
| 1095 | I | Canadian Interventional Radiology Association         | Interdisciplinary Canadian guidelines on the use of metal stents in the gastrointestinal tract for oncological indications                                 | 2008-June                          |
| 1096 | I | Canadian Urological Association                       | Investigation and management of antenatally detected hydronephrosis                                                                                        | 2008-June                          |
| 1097 | M | Canadian Kidney Cancer Forum                          | Management of kidney cancer: Canadian Kidney Cancer Forum Consensus Statement                                                                              | 2008-June                          |
| 1098 | P | Alberta Health and Wellness                           | Prenatal HIV: public health guidelines for the management and follow-up of HIV positive pregnant women and their infants                                   | 2008-June                          |
| 1099 | P | Cancer Care Ontario's Program in Evidence-based Care  | Preoperative or postoperative therapy for the management of patients with stage II or III rectal cancer                                                    | 2008-July-15                       |

|      |   |                                                                                               |                                                                                                                                           |              |
|------|---|-----------------------------------------------------------------------------------------------|-------------------------------------------------------------------------------------------------------------------------------------------|--------------|
| 1100 | C | Canadian Association of Oral & Maxillofacial Surgeons                                         | Canadian consensus practice guidelines for bisphosphonate associated osteonecrosis of the jaw                                             | 2008-July    |
| 1101 | H | Society of Obstetricians and Gynaecologists of Canada                                         | Guideline for the management of postoperative nausea and vomiting                                                                         | 2008-July    |
| 1102 | N | Society of Obstetricians and Gynaecologists of Canada                                         | New molecular techniques for the prenatal detection of chromosomal aneuploidy                                                             | 2008-July    |
| 1103 | S | Public Health Agency of Canada                                                                | Statement on influenza vaccination for the 2008-2009 season                                                                               | 2008-July    |
| 1104 | D | Agence de santé publique du Canada                                                            | Déclaration sur la vaccination antigrippale pour la saison 2008-2009                                                                      | 2008-juill   |
| 1105 | D | Société des obstétriciens et gynécologues du Canada                                           | Directive clinique sur la prise en charge des nausées et des vomissements postopératoires                                                 | 2008-juill   |
| 1106 | N | Société des obstétriciens et gynécologues du Canada                                           | Nouvelles techniques moléculaires de dépistage prénatal de l'aneuploïdie chromosomique                                                    | 2008-juill   |
| 1107 | D | Société des obstétriciens et gynécologues du Canada                                           | Dépistage et prise en charge de la vaginose bactérienne pendant la grossesse                                                              | 2008-août    |
| 1108 | I | Société des obstétriciens et gynécologues du Canada                                           | Interventions de fronde mi-urétrales à effraction minimale visant à contrer l'incontinence urinaire à l'effort                            | 2008-août    |
| 1109 | O | Société des obstétriciens et gynécologues du Canada                                           | Opinion de comité de la SOGC sur l'épreuve urodynamique                                                                                   | 2008-août    |
| 1110 | L | Ontario Agency for Health Protection and Promotion                                            | Listeria monocytogenes : a clinical practice guideline                                                                                    | 2008-Sept-3  |
| 1111 | F | Cancer Care Ontario's Program in Evidence-based Care                                          | Fulvestrant for systemic therapy of locally advanced or metastatic breast cancer in postmenopausal women                                  | 2008-Sept-25 |
| 1112 | C | Guidelines and Protocols Advisory Committee (BC)                                              | Chronic kidney disease - identification, evaluation and management of patients                                                            | 2008-Sept-15 |
| 1113 | C | Canadian Association of Emergency Physicians                                                  | Canadian Association of Emergency Physicians Sepsis Guidelines: the optimal management of severe sepsis in Canadian emergency departments | 2008-Sept    |
| 1114 | D | Collège canadien de généticiens médicaux; Société des obstétriciens et gynécologues du Canada | Dépistage du X fragile en obstétrique-gynécologie au Canada                                                                               | 2008-sept    |

|      |   |                                                                                                |                                                                                                                                                            |            |
|------|---|------------------------------------------------------------------------------------------------|------------------------------------------------------------------------------------------------------------------------------------------------------------|------------|
| 1115 | D | Société des obstétriciens et gynécologues du Canada                                            | Directive clinique sur la prise en charge de la grossesse entre la 41e+0 et la 42e+0 semaine de gestation                                                  | 2008-sept  |
| 1116 | F | Canadian College of Medical Geneticists; Society of Obstetricians and Gynaecologists of Canada | Fragile X testing in obstetrics and gynaecology in Canada                                                                                                  | 2008-Sept  |
| 1117 | H | Ontario Association of Medical Laboratories                                                    | Guideline for the laboratory monitoring of oral anticoagulation (Warfarin)                                                                                 | 2008-Sept  |
| 1118 | H | Society of Obstetricians and Gynaecologists of Canada                                          | Guidelines for the management of pregnancy at 41+0 to 42+0 weeks                                                                                           | 2008-Sept  |
| 1119 | R | Agence de santé publique du Canada                                                             | Recommandations aux professionnels de la santé : listériose : lignes directrices canadiennes sur le diagnostic et la prise en charge des cas de listériose | 2008-sept  |
| 1120 | R | Public Health Agency of Canada                                                                 | Recommendations to health care professionals : listeriosis : consensus Canadian guidelines for diagnosis and management of listeriosis                     | 2008-Sept  |
| 1121 | T | Cancer Care Ontario's Program in Evidence-based Care                                           | The management of thymoma: Guideline recommendations                                                                                                       | 2008-Sept  |
| 1122 | D | Canadian Consensus Conference on the Diagnosis and Treatment of Dementia                       | Diagnosis and treatment of dementia : 4. Approach to management of mild to moderate dementia                                                               | 2008-Oct-7 |
| 1123 | C | Canadian Ophthalmological Society                                                              | Canadian Ophthalmological Society evidence-based clinical practice guidelines for cataract surgery in the adult eye                                        | 2008-Oct   |
| 1124 | C | Canadian College of Medical Geneticists; Society of Obstetricians and Gynaecologists of Canada | Carrier screening for Thalassemia and hemoglobinopathies in Canada                                                                                         | 2008-Oct   |
| 1125 | C | Société des obstétriciens et gynécologues du Canada                                            | Complications obstétricales associées aux analytes anormaux des marqueurs sériques maternels                                                               | 2008-oct   |
| 1126 | D | Collège canadien de généticiens médicaux; Société des obstétriciens et gynécologues du Canada  | Dépistage des porteurs de thalassémie et d'hémoglobinopathies au Canada                                                                                    | 2008-oct   |
| 1127 | F | Guidelines and Protocols Advisory Committee (BC)                                               | Frailty in older adults – early identification and management                                                                                              | 2008-Oct   |

|      |   |                                                                          |                                                                                                                                                                             |            |
|------|---|--------------------------------------------------------------------------|-----------------------------------------------------------------------------------------------------------------------------------------------------------------------------|------------|
| 1128 | H | Société canadienne d'ophtalmologie                                       | Guide de pratique clinique factuelle de la Société canadienne d'ophtalmologie pour la chirurgie de la cataracte de l'œil adulte                                             | 2008-oct   |
| 1129 | O | Society of Obstetricians and Gynaecologists of Canada                    | Obstetrical complications associated with abnormal maternal serum markers analytes                                                                                          | 2008-Oct   |
| 1130 | S | Saskatchewan Cancer Agency                                               | SCA clinical practice guideline for prostate cancer                                                                                                                         | 2008-Oct   |
| 1131 | U | Public Health Agency of Canada                                           | Updated recommendations on interferon gamma release assays for latent tuberculosis infection                                                                                | 2008-Oct   |
| 1132 | D | Canadian Consensus Conference on the Diagnosis and Treatment of Dementia | Diagnosis and treatment of dementia : 5. Nonpharmacologic and pharmacologic therapy for mild to moderate dementia                                                           | 2008-Nov-4 |
| 1133 | A | Guidelines and Protocols Advisory Committee (BC)                         | Acute chest pain - evaluation and triage                                                                                                                                    | 2008-Nov   |
| 1134 | A | Canadian Paediatric Society                                              | Advance care planning for paediatric patients                                                                                                                               | 2008-Nov   |
| 1135 | C | Regina Qu'Appelle Health Region                                          | Clinical practice guidelines for the prevention and management of diabetes foot complications                                                                               | 2008-Nov   |
| 1136 | L | Société canadienne de pédiatrie                                          | La planification préalable des soins pour les patients en pédiatrie                                                                                                         | 2008-nov   |
| 1137 | L | Association canadienne des médecins d'urgence                            | Lignes directrices de l'Association canadienne des médecins d'urgence sur le sepsis : la prise en charge optimale du sepsis grave dans les départements d'urgence canadiens | 2008-nov   |
| 1138 | M | Thrombosis Interest Group of Canada                                      | Managing warfarin associated coagulopathy                                                                                                                                   | 2008-Nov   |
| 1139 | M | Society of Obstetricians and Gynaecologists of Canada                    | Missed hormonal contraceptives: new recommendations                                                                                                                         | 2008-Nov   |
| 1140 | O | Société des obstétriciens et gynécologues du Canada                      | Oubli de doses de contraceptif hormonal: nouvelles recommandations                                                                                                          | 2008-nov   |
| 1141 | P | Thrombosis Interest Group of Canada                                      | Prevention of deep vein thrombosis in medical patients                                                                                                                      | 2008-Nov   |
| 1142 | D | Canadian Consensus Conference on the Diagnosis and Treatment of Dementia | Diagnosis and treatment of dementia: 6. Management of severe Alzheimer disease                                                                                              | 2008-Dec-2 |



|      |   |                                                                                                                                                                                                                                                                                  |                                                                                                                       |                              |
|------|---|----------------------------------------------------------------------------------------------------------------------------------------------------------------------------------------------------------------------------------------------------------------------------------|-----------------------------------------------------------------------------------------------------------------------|------------------------------|
| 1143 | T | Cancer Care Ontario's Program in Evidence-based Care                                                                                                                                                                                                                             | Treatment of acute myeloid leukemia in older patients: guideline recommendations                                      | 2008-Dec-18                  |
| 1144 | A | Thrombosis Interest Group of Canada                                                                                                                                                                                                                                              | Antiplatelet therapy                                                                                                  | 2004-Nov (Reviewed 2008-Dec) |
| 1145 | P | Thrombosis Interest Group of Canada                                                                                                                                                                                                                                              | Post myocardial infarction                                                                                            | 2005-Aug (Reviewed 2008-Dec) |
| 1146 | D | Collège des médecins de famille du Canada; L'Association des infirmières en santé des femmes, en obstétrique et en néonatalogie au Canada; Association canadienne des sages-femmes; Société de la médecine rurale du Canada; Société des obstétriciens et gynécologues du Canada | Déclaration de principe commune sur l'accouchement normal                                                             | 2008-déc                     |
| 1147 | C | Canadian Association of Radiologists                                                                                                                                                                                                                                             | Canadian Association of Radiologists National Advisory on gadolinium administration and nephrogenic systemic fibrosis | 2008-Dec                     |
| 1148 | J | College of Family Physicians of Canada; The Association of Women's Health, Obstetric and Neonatal Nurses Canada; Canadian Association of Midwives; Society of Rural Physicians of Canada; Society of Obstetricians and Gynaecologists of Canada                                  | Joint policy statement on normal childbirth                                                                           | 2008-Dec                     |
| 1149 | O | Registered Nurses' Association of Ontario                                                                                                                                                                                                                                        | Oral health: Nursing assessment and interventions                                                                     | 2008-Dec                     |
| 1150 | S | Thrombosis Interest Group of Canada                                                                                                                                                                                                                                              | Stroke prevention in atrial fibrillation                                                                              | 2008-Dec                     |
