# Supplementary material for: Reporting of financial conflicts of interest in clinical practice guidelines: a case study analysis of guidelines from the Canadian Medical Association Infobase
Source: PubMed Central journal article supplement (PMC4986411; doi:10.1186/s12913-016-1646-5), 2016-08-15
Supplement: 12913_2016_1646_MOESM3_ESM.pdf [file 12913_2016_1646_MOESM3_ESM.pdf]

| Appendix 3: Guideline-level data on recommended drugs and guideline-affiliated organizations |                                    |          |                                                                                                                                                                                                                       |                                            |                                                                             |                                                                                          |                                                                                                                             |                                                                                                                                                                                                                                                                                            |
|----------------------------------------------------------------------------------------------|------------------------------------|----------|-----------------------------------------------------------------------------------------------------------------------------------------------------------------------------------------------------------------------|--------------------------------------------|-----------------------------------------------------------------------------|------------------------------------------------------------------------------------------|-----------------------------------------------------------------------------------------------------------------------------|--------------------------------------------------------------------------------------------------------------------------------------------------------------------------------------------------------------------------------------------------------------------------------------------|
| Clinical practice guideline ID #                                                             | Most recent review or publish date | CPS year | Clinical practice guideline title                                                                                                                                                                                     | Drugs recommended for first-line treatment | Brand companies identified in CPS or whether generic versions are available | Name of recommended drug identified in CPS or brand name to which generic name redirects | Guideline-affiliated organizations and [source] of identified relationship with pharmaceutical companies                    | Identified pharmaceutical companies with relationship with organizations <sup>1</sup>                                                                                                                                                                                                      |
| 5                                                                                            | 2013                               | 2013     | The 2012-2013 Canadian Hypertension Education Program (CHEP) Guidelines for Pharmacists: An Update                                                                                                                    | spironolactone                             | generic versions                                                            |                                                                                          | EPICORE Centre/COMPRIS [1]                                                                                                  | <ul style="list-style-type: none"> <li>- Apotex Inc.</li> <li>- AstraZeneca Canada</li> <li>- Bayer Healthcare Pharmaceuticals</li> <li>- Bristol-Myers Squibb/Sanofi-Aventis</li> <li>- Merck Frosst Canada</li> </ul>                                                                    |
|                                                                                              |                                    |          |                                                                                                                                                                                                                       | eplerenone                                 | Pfizer                                                                      | Inspira                                                                                  |                                                                                                                             |                                                                                                                                                                                                                                                                                            |
| 7                                                                                            | 2013                               | 2013     | Canadian Network for Mood and Anxiety Treatments (CANMAT) and International Society for Bipolar Disorders (ISBD) Collaborative Update of CANMAT Guidelines for the Management of Patients with Bipolar Disorder: 2009 | lithium                                    | generic versions                                                            |                                                                                          | Canadian Network for Mood and Anxiety Treatments (CANMAT) [2]<br><br>International Society for Bipolar Disorders (ISBD) [3] | CANMAT<br><ul style="list-style-type: none"> <li>- None identified</li> </ul> ISBD<br><ul style="list-style-type: none"> <li>- Janssen Pharmaceutical Companies</li> <li>- Forest Pharmaceuticals</li> <li>- Teva Pharmaceutical Industries</li> <li>- Sunovion Pharmaceuticals</li> </ul> |
|                                                                                              |                                    |          |                                                                                                                                                                                                                       | divalproex                                 | generic versions                                                            |                                                                                          |                                                                                                                             |                                                                                                                                                                                                                                                                                            |
|                                                                                              |                                    |          |                                                                                                                                                                                                                       | olanzapine                                 | generic versions                                                            |                                                                                          |                                                                                                                             |                                                                                                                                                                                                                                                                                            |
|                                                                                              |                                    |          |                                                                                                                                                                                                                       | risperidone                                | generic versions                                                            |                                                                                          |                                                                                                                             |                                                                                                                                                                                                                                                                                            |
|                                                                                              |                                    |          |                                                                                                                                                                                                                       | quetiapine                                 | generic versions                                                            |                                                                                          |                                                                                                                             |                                                                                                                                                                                                                                                                                            |
|                                                                                              |                                    |          |                                                                                                                                                                                                                       | quetiapine XR                              | generic versions                                                            |                                                                                          |                                                                                                                             |                                                                                                                                                                                                                                                                                            |
|                                                                                              |                                    |          |                                                                                                                                                                                                                       | aripiprazole                               | Bristol-Myers Squibb                                                        | Abilify                                                                                  |                                                                                                                             |                                                                                                                                                                                                                                                                                            |
|                                                                                              |                                    |          |                                                                                                                                                                                                                       | ziprasidone                                | Pfizer                                                                      | Zeldox                                                                                   |                                                                                                                             |                                                                                                                                                                                                                                                                                            |
|                                                                                              |                                    |          |                                                                                                                                                                                                                       | lamotrigine                                | generic versions                                                            |                                                                                          |                                                                                                                             |                                                                                                                                                                                                                                                                                            |
| bupropion                                                                                    | generic versions                   |          |                                                                                                                                                                                                                       |                                            |                                                                             |                                                                                          |                                                                                                                             |                                                                                                                                                                                                                                                                                            |
| 18                                                                                           | 2013                               | 2013     | Management of Small Cell Carcinoma of the Bladder: Consensus Guidelines from the Canadian Association of Genitourinary Medical Oncologists (CAGMO)                                                                    | cisplatin                                  | generic versions                                                            |                                                                                          | Canadian Association of Medical Oncologists (CAMO) [4]                                                                      | - None identified                                                                                                                                                                                                                                                                          |
|                                                                                              |                                    |          |                                                                                                                                                                                                                       | carboplatin                                | generic versions                                                            |                                                                                          |                                                                                                                             |                                                                                                                                                                                                                                                                                            |
|                                                                                              |                                    |          |                                                                                                                                                                                                                       | etoposide                                  | generic versions                                                            |                                                                                          |                                                                                                                             |                                                                                                                                                                                                                                                                                            |
|                                                                                              |                                    |          |                                                                                                                                                                                                                       | irinotecan                                 | generic versions                                                            |                                                                                          |                                                                                                                             |                                                                                                                                                                                                                                                                                            |
| 27                                                                                           | 2013                               | 2013     | Canadian Network for Mood and Anxiety Treatments (CANMAT) and International Society for Bipolar Disorders (ISBD) Collaborative                                                                                        | lithium                                    | generic versions                                                            |                                                                                          | Canadian Network for Mood and Anxiety Treatments (CANMAT) [2]                                                               | - None identified                                                                                                                                                                                                                                                                          |
|                                                                                              |                                    |          |                                                                                                                                                                                                                       | divalproex                                 | generic versions                                                            |                                                                                          |                                                                                                                             |                                                                                                                                                                                                                                                                                            |
|                                                                                              |                                    |          |                                                                                                                                                                                                                       | divalproex ER                              | generic versions                                                            |                                                                                          |                                                                                                                             |                                                                                                                                                                                                                                                                                            |
|                                                                                              |                                    |          |                                                                                                                                                                                                                       | olanzapine                                 | generic versions                                                            |                                                                                          |                                                                                                                             |                                                                                                                                                                                                                                                                                            |
|                                                                                              |                                    |          |                                                                                                                                                                                                                       | risperidone                                | generic versions                                                            |                                                                                          |                                                                                                                             |                                                                                                                                                                                                                                                                                            |

<sup>1</sup> Excludes corporate sponsorship of conferences.

|    |      |      |                                                                                                                                   |                                 |                      |                                                                                  |                                                                   |                                                                                                                                                                                                                                                                       |
|----|------|------|-----------------------------------------------------------------------------------------------------------------------------------|---------------------------------|----------------------|----------------------------------------------------------------------------------|-------------------------------------------------------------------|-----------------------------------------------------------------------------------------------------------------------------------------------------------------------------------------------------------------------------------------------------------------------|
|    |      |      | Update of CANMAT Guidelines for the Management of Patients with Bipolar Disorder: Update 2013                                     | quetiapine                      | generic versions     |                                                                                  |                                                                   |                                                                                                                                                                                                                                                                       |
|    |      |      |                                                                                                                                   | quetiapine XR                   | generic versions     |                                                                                  |                                                                   |                                                                                                                                                                                                                                                                       |
|    |      |      |                                                                                                                                   | aripiprazole                    | Bristol-Myers Squibb | Abilify                                                                          |                                                                   |                                                                                                                                                                                                                                                                       |
|    |      |      |                                                                                                                                   | ziprasidone                     | Pfizer               | Zeldox                                                                           |                                                                   |                                                                                                                                                                                                                                                                       |
|    |      |      |                                                                                                                                   | asenapine                       | Merck                | Saphris                                                                          |                                                                   |                                                                                                                                                                                                                                                                       |
|    |      |      |                                                                                                                                   | paliperidone ER                 | Janssen              | Invega                                                                           |                                                                   |                                                                                                                                                                                                                                                                       |
|    |      |      |                                                                                                                                   | lamotrigine                     | generic versions     |                                                                                  |                                                                   |                                                                                                                                                                                                                                                                       |
|    |      |      |                                                                                                                                   | bupropion                       | generic versions     |                                                                                  |                                                                   |                                                                                                                                                                                                                                                                       |
| 29 | 2013 | 2013 | The 2012 Canadian Cardiovascular Society Heart Failure Management Guidelines Update: Focus on Acute and Chronic Heart Failure     | furosemide                      | generic versions     |                                                                                  | Canadian Cardiovascular Society (CCS) [5-7]                       | <ul style="list-style-type: none"> <li>- AstraZeneca Canada Inc.</li> <li>- PendoPharm</li> <li>- Servier Canada Inc.</li> <li>- Pfizer</li> <li>- Bristol Myers Squibb</li> <li>- Bayer</li> <li>- Boehringer Ingelheim</li> <li>- Merck</li> <li>- Amgen</li> </ul> |
|    |      |      |                                                                                                                                   | nitroglycerin                   | generic versions     |                                                                                  |                                                                   |                                                                                                                                                                                                                                                                       |
|    |      |      |                                                                                                                                   | nesiritide                      | Janssen              | Natrecor                                                                         |                                                                   |                                                                                                                                                                                                                                                                       |
|    |      |      |                                                                                                                                   | nitroprusside                   | Hospira              | Nipride                                                                          |                                                                   |                                                                                                                                                                                                                                                                       |
|    |      |      |                                                                                                                                   | tolvaptan                       | Otsuka               | Samsca                                                                           |                                                                   |                                                                                                                                                                                                                                                                       |
|    |      |      |                                                                                                                                   | eplerenone                      | Pfizer               | Inspra                                                                           |                                                                   |                                                                                                                                                                                                                                                                       |
|    |      |      |                                                                                                                                   | spironolactone                  | generic versions     |                                                                                  |                                                                   |                                                                                                                                                                                                                                                                       |
|    |      |      |                                                                                                                                   | metolazone                      | Sanofi-Aventis       | Zaroxolyn                                                                        |                                                                   |                                                                                                                                                                                                                                                                       |
|    |      |      |                                                                                                                                   | digoxin                         | generic versions     |                                                                                  |                                                                   |                                                                                                                                                                                                                                                                       |
|    |      |      |                                                                                                                                   | isosorbide dinitrate            | generic versions     |                                                                                  |                                                                   |                                                                                                                                                                                                                                                                       |
|    |      |      |                                                                                                                                   | hydralazine                     | generic versions     |                                                                                  |                                                                   |                                                                                                                                                                                                                                                                       |
|    |      |      |                                                                                                                                   | Aspirin                         | generic versions     |                                                                                  |                                                                   |                                                                                                                                                                                                                                                                       |
| 35 | 2013 | 2013 | Bortezomib in Multiple Myeloma and Lymphoma                                                                                       | bortezomib                      | Janssen              | Velcade                                                                          | Cancer Care Ontario (CCO) [8,9]                                   | - None identified                                                                                                                                                                                                                                                     |
|    |      |      |                                                                                                                                   | melphalan                       | Triton Pharma        | Alkeran                                                                          |                                                                   |                                                                                                                                                                                                                                                                       |
|    |      |      |                                                                                                                                   | prednisone                      | generic versions     |                                                                                  |                                                                   |                                                                                                                                                                                                                                                                       |
|    |      |      |                                                                                                                                   | dexamethasone                   | generic versions     |                                                                                  |                                                                   |                                                                                                                                                                                                                                                                       |
|    |      |      |                                                                                                                                   | pegylated liposomal doxorubicin | Roche, Merck         | Peginterferon, Pegasys, Pegasys RBV (Pegasys and Copegus), Pegetron, Unitron PEG |                                                                   |                                                                                                                                                                                                                                                                       |
| 40 | 2013 | 2013 | Recommendations for Antithrombotic Agents for the Prevention of Stroke and Systemic Embolism in Patients with Atrial Fibrillation | acetylsalicylic acid            | generic versions     |                                                                                  | Canadian Agency for Drugs and Technologies in Health (CADTH) [10] | - None identified                                                                                                                                                                                                                                                     |
|    |      |      |                                                                                                                                   | clopidogrel                     | generic versions     |                                                                                  |                                                                   |                                                                                                                                                                                                                                                                       |
|    |      |      |                                                                                                                                   | warfarin                        | generic versions     |                                                                                  |                                                                   |                                                                                                                                                                                                                                                                       |
|    |      |      |                                                                                                                                   | dabigatran                      | Boehringer-Ingelheim | Pradax                                                                           |                                                                   |                                                                                                                                                                                                                                                                       |
|    |      |      |                                                                                                                                   | rivaroxaban                     | Bayer                | Xarelto                                                                          |                                                                   |                                                                                                                                                                                                                                                                       |
|    |      |      |                                                                                                                                   | apixaban                        | Bristol-Myers Squibb | Eliquis                                                                          |                                                                   |                                                                                                                                                                                                                                                                       |
| 44 | 2013 | 2013 | CUA-CUOG Guidelines for the                                                                                                       | abiraterone acetate             | Janssen              | Zytiga                                                                           | Canadian Canadian                                                 | <ul style="list-style-type: none"> <li>- Astellas</li> <li>- Actavis</li> </ul>                                                                                                                                                                                       |
|    |      |      |                                                                                                                                   | prednisone                      | generic versions     |                                                                                  |                                                                   |                                                                                                                                                                                                                                                                       |

|    |      |      |                                                                                          |                                   |                            |                             |                                                                            |                                                                                                                                                                                                                                                                                                                                                                                                                                                     |
|----|------|------|------------------------------------------------------------------------------------------|-----------------------------------|----------------------------|-----------------------------|----------------------------------------------------------------------------|-----------------------------------------------------------------------------------------------------------------------------------------------------------------------------------------------------------------------------------------------------------------------------------------------------------------------------------------------------------------------------------------------------------------------------------------------------|
|    |      |      | Management of Castration-Resistant Prostate Cancer (CRPC): 2013 Update                   | docetaxel                         | Hospira                    | Taxotere                    | Urological Association (CUA) [11]                                          | <ul style="list-style-type: none"> <li>- GlaxoSmithKline</li> <li>- Pfizer</li> </ul>                                                                                                                                                                                                                                                                                                                                                               |
|    |      |      |                                                                                          | cabazitaxel                       | Sanofi-Aventis             | Jevtana                     |                                                                            |                                                                                                                                                                                                                                                                                                                                                                                                                                                     |
|    |      |      |                                                                                          | enzalutamide                      | Astellas                   | Xtandi                      |                                                                            |                                                                                                                                                                                                                                                                                                                                                                                                                                                     |
|    |      |      |                                                                                          | denosumab                         | Amgen                      | Prolia, Xgeva               |                                                                            |                                                                                                                                                                                                                                                                                                                                                                                                                                                     |
|    |      |      |                                                                                          | zoledronic acid                   | Novartis Pharmaceuticals   | Aclasta, Zometa concentrate |                                                                            |                                                                                                                                                                                                                                                                                                                                                                                                                                                     |
|    |      |      |                                                                                          | calcium                           | generic versions           |                             |                                                                            |                                                                                                                                                                                                                                                                                                                                                                                                                                                     |
|    |      |      |                                                                                          | vitamin D                         | generic versions           |                             |                                                                            |                                                                                                                                                                                                                                                                                                                                                                                                                                                     |
| 46 | 2013 | 2013 | Management of Advanced Kidney Cancer: Canadian Kidney Cancer Forum 2013 Consensus Update | high-dose interleukin-2 (HD IL-2) | Novartis Pharmaceuticals   | Proleukin, aldesleukin      | Kidney Cancer Research Network of Canada,[12]<br>Kidney Cancer Canada [13] | <ul style="list-style-type: none"> <li>- Password protected</li> </ul> <p>Kidney Cancer Canada</p> <ul style="list-style-type: none"> <li>- Astellas Pharma Canada</li> <li>- AstraZeneca</li> <li>- Bayer Inc.</li> <li>- Boehringer Ingelheim Canada</li> <li>- Rx&amp;D</li> <li>- Celgene Canada</li> <li>- Eli Lilly &amp; Co.</li> <li>- GlaxoSmithKline</li> <li>- Janssen</li> <li>- Novartis</li> <li>- Pfizer</li> <li>- Roche</li> </ul> |
|    |      |      |                                                                                          | pazopanib                         | GlaxoSmithKline            | Votrient                    |                                                                            |                                                                                                                                                                                                                                                                                                                                                                                                                                                     |
|    |      |      |                                                                                          | tivozanib                         | not found in CPS or DPD    |                             |                                                                            |                                                                                                                                                                                                                                                                                                                                                                                                                                                     |
|    |      |      |                                                                                          | temsirolimus                      | Pfizer                     | Torisel                     |                                                                            |                                                                                                                                                                                                                                                                                                                                                                                                                                                     |
|    |      |      |                                                                                          | bevacizumab                       | Roche                      | Avastin                     |                                                                            |                                                                                                                                                                                                                                                                                                                                                                                                                                                     |
|    |      |      |                                                                                          | everolimus                        | Novartis Pharmaceuticals   | Afinitor                    |                                                                            |                                                                                                                                                                                                                                                                                                                                                                                                                                                     |
|    |      |      |                                                                                          | sorafenib                         | Bayer                      | Nexavar                     |                                                                            |                                                                                                                                                                                                                                                                                                                                                                                                                                                     |
|    |      |      |                                                                                          | sunitinib                         | Pfizer                     | Sutent                      |                                                                            |                                                                                                                                                                                                                                                                                                                                                                                                                                                     |
|    |      |      |                                                                                          | insulin NPH                       | Eli Lilly, NovoNordisk     | Humulin-N, Novolinge NPH    |                                                                            |                                                                                                                                                                                                                                                                                                                                                                                                                                                     |
| 93 | 2013 | 2013 | Canadian Telestroke Action Collaborate Telestroke Implementation Toolkit October 2013    | alteplase (tPA)                   | Roche                      | Activase rtPA, Cathflo      | Heart and Stroke Foundation [14]                                           | <ul style="list-style-type: none"> <li>- Bayer Inc.</li> <li>- Boehringer Ingelheim</li> <li>- Bristol-Myers Squibb</li> <li>- Pfizer</li> <li>- Janssen</li> <li>- Allergan</li> <li>- Merz</li> </ul>                                                                                                                                                                                                                                             |
| 94 | 2013 | 2013 | Canadian Headache Society Guideline Acute Drug Therapy for Migraine Headache             | acetaminophen                     | generic versions           |                             | Headache Network Canada [15]                                               | <ul style="list-style-type: none"> <li>- Pfizer</li> </ul>                                                                                                                                                                                                                                                                                                                                                                                          |
|    |      |      |                                                                                          | almotriptan                       | McNeil Consumer Healthcare | Axert                       |                                                                            |                                                                                                                                                                                                                                                                                                                                                                                                                                                     |
|    |      |      |                                                                                          | acetylsalicylic acid              | generic versions           |                             |                                                                            |                                                                                                                                                                                                                                                                                                                                                                                                                                                     |
|    |      |      |                                                                                          | diclofenac potassium              | generic versions           |                             |                                                                            |                                                                                                                                                                                                                                                                                                                                                                                                                                                     |
|    |      |      |                                                                                          | dihydroergotamine                 | generic versions           |                             |                                                                            |                                                                                                                                                                                                                                                                                                                                                                                                                                                     |
|    |      |      |                                                                                          | eletriptan                        | Pfizer                     | Relpax                      |                                                                            |                                                                                                                                                                                                                                                                                                                                                                                                                                                     |
|    |      |      |                                                                                          | ergotamine                        | Novartis Pharmaceuticals   | Cafegot                     |                                                                            |                                                                                                                                                                                                                                                                                                                                                                                                                                                     |
|    |      |      |                                                                                          | frovatriptan                      | generic versions           |                             |                                                                            |                                                                                                                                                                                                                                                                                                                                                                                                                                                     |
|    |      |      |                                                                                          | ibuprofen                         | generic versions           |                             |                                                                            |                                                                                                                                                                                                                                                                                                                                                                                                                                                     |
|    |      |      |                                                                                          | metoclopramide                    | generic versions           |                             |                                                                            |                                                                                                                                                                                                                                                                                                                                                                                                                                                     |

|            |                  |      |                                                                                                                                                          |                                                         |                         |                                              |                                                                        |                                                                                                                                                                                                                                                                       |
|------------|------------------|------|----------------------------------------------------------------------------------------------------------------------------------------------------------|---------------------------------------------------------|-------------------------|----------------------------------------------|------------------------------------------------------------------------|-----------------------------------------------------------------------------------------------------------------------------------------------------------------------------------------------------------------------------------------------------------------------|
|            |                  |      |                                                                                                                                                          | naproxen sodium                                         | generic versions        |                                              |                                                                        |                                                                                                                                                                                                                                                                       |
|            |                  |      |                                                                                                                                                          | naratriptan                                             | generic versions        |                                              |                                                                        |                                                                                                                                                                                                                                                                       |
|            |                  |      |                                                                                                                                                          | rizatriptan                                             | generic versions        |                                              |                                                                        |                                                                                                                                                                                                                                                                       |
|            |                  |      |                                                                                                                                                          | sumatriptan                                             | generic versions        |                                              |                                                                        |                                                                                                                                                                                                                                                                       |
|            |                  |      |                                                                                                                                                          | zolmitriptan                                            | generic versions        |                                              |                                                                        |                                                                                                                                                                                                                                                                       |
|            |                  |      |                                                                                                                                                          | domperidone                                             | generic versions        |                                              |                                                                        |                                                                                                                                                                                                                                                                       |
|            |                  |      |                                                                                                                                                          | codeine                                                 | generic versions        |                                              |                                                                        |                                                                                                                                                                                                                                                                       |
|            |                  |      |                                                                                                                                                          | tramadol                                                | generic versions        |                                              |                                                                        |                                                                                                                                                                                                                                                                       |
| 103        | 2013             | 2013 | Canadian Cardiovascular Society Guidelines on the Use of Cardiac Resynchronization Therapy: Implementation                                               | warfarin                                                | generic versions        |                                              | Canadian Cardiovascular Society (CCS) [5-7]                            | <ul style="list-style-type: none"> <li>- AstraZeneca Canada Inc.</li> <li>- PendoPharm</li> <li>- Servier Canada Inc.</li> <li>- Pfizer</li> <li>- Bristol Myers Squibb</li> <li>- Bayer</li> <li>- Boehringer Ingelheim</li> <li>- Merck</li> <li>- Amgen</li> </ul> |
| 112        | 2012             | 2012 | The Use of Antiviral Drugs for Influenza: Guidance for Practitioners 2012/2013                                                                           | oseltamivir (Tamiflu "by Hoffman-La Roche Ltd, Canada") | Roche                   |                                              | Association of Medical Microbiology and Infectious Disease Canada [16] | - None identified                                                                                                                                                                                                                                                     |
|            |                  |      |                                                                                                                                                          | zanamivir                                               | GlaxoSmithKline         | Relenza                                      |                                                                        |                                                                                                                                                                                                                                                                       |
| 242        | 2012             | 2012 | Focused 2012 Update of the Canadian Cardiovascular Society Atrial Fibrillation Guidelines: Recommendations for Stroke Prevention and Rate/Rhythm Control | acetylsalicylic acid                                    | generic versions        |                                              | Canadian Cardiovascular Society (CCS) [5-7]                            | <ul style="list-style-type: none"> <li>- AstraZeneca Canada Inc.</li> <li>- PendoPharm</li> <li>- Servier Canada Inc.</li> <li>- Pfizer</li> <li>- Bristol Myers Squibb</li> <li>- Bayer</li> <li>- Boehringer Ingelheim</li> <li>- Merck</li> <li>- Amgen</li> </ul> |
|            |                  |      |                                                                                                                                                          | dabigatran                                              | Boehringer-Ingelheim    | Pradax                                       |                                                                        |                                                                                                                                                                                                                                                                       |
|            |                  |      |                                                                                                                                                          | rivaroxaban                                             | Bayer                   | Xarelto                                      |                                                                        |                                                                                                                                                                                                                                                                       |
|            |                  |      |                                                                                                                                                          | apixaban                                                | Bristol-Myers Squibb    | Eliquis                                      |                                                                        |                                                                                                                                                                                                                                                                       |
|            |                  |      |                                                                                                                                                          | clopidogrel                                             | Sanofi-Aventis          | Plavix                                       |                                                                        |                                                                                                                                                                                                                                                                       |
|            |                  |      |                                                                                                                                                          | diltiazem                                               | generic versions        |                                              |                                                                        |                                                                                                                                                                                                                                                                       |
|            |                  |      |                                                                                                                                                          | verapamil                                               | generic versions        |                                              |                                                                        |                                                                                                                                                                                                                                                                       |
|            |                  |      |                                                                                                                                                          | digoxin                                                 | generic versions        |                                              |                                                                        |                                                                                                                                                                                                                                                                       |
|            |                  |      |                                                                                                                                                          | dronedarone                                             | Sanofi-Aventis          | Multaq                                       |                                                                        |                                                                                                                                                                                                                                                                       |
|            |                  |      |                                                                                                                                                          | flecainide                                              | Graceway                | Tambocor                                     |                                                                        |                                                                                                                                                                                                                                                                       |
|            |                  |      |                                                                                                                                                          | propafenone                                             | Sanis Health, Abbott    | Propafenone (Sanis Health); Rythmol (Abbott) |                                                                        |                                                                                                                                                                                                                                                                       |
|            |                  |      |                                                                                                                                                          | sotalol                                                 | generic versions        |                                              |                                                                        |                                                                                                                                                                                                                                                                       |
| amiodarone | generic versions |      |                                                                                                                                                          |                                                         |                         |                                              |                                                                        |                                                                                                                                                                                                                                                                       |
| 244        | 2012             | 2013 | Management of Patients with Refractory Angina: Canadian                                                                                                  | allopurinol                                             | generic versions        |                                              | Canadian Cardiovascular Society (CCS) [5-7]                            | <ul style="list-style-type: none"> <li>- AstraZeneca Canada Inc.</li> <li>- PendoPharm</li> <li>- Servier Canada Inc.</li> <li>- Pfizer</li> </ul>                                                                                                                    |
|            |                  |      |                                                                                                                                                          | ranolazine                                              | not found in CPS or DPD |                                              |                                                                        |                                                                                                                                                                                                                                                                       |
|            |                  |      |                                                                                                                                                          | trimetazidine                                           | not found in CPS or DPD |                                              |                                                                        |                                                                                                                                                                                                                                                                       |

|     |      |      |                                                                                                                                                                |              |                            |                                                                                                                                                                                                                                                                                                                                                          |                                           |                                                                                                                                                             |
|-----|------|------|----------------------------------------------------------------------------------------------------------------------------------------------------------------|--------------|----------------------------|----------------------------------------------------------------------------------------------------------------------------------------------------------------------------------------------------------------------------------------------------------------------------------------------------------------------------------------------------------|-------------------------------------------|-------------------------------------------------------------------------------------------------------------------------------------------------------------|
|     |      |      | Cardiovascular Society/Canadian Pain Society Joint Guidelines                                                                                                  | nicorandil   | not found in CPS or DPD    |                                                                                                                                                                                                                                                                                                                                                          |                                           | <ul style="list-style-type: none"> <li>- Bristol Myers Squibb</li> <li>- Bayer</li> <li>- Boehringer Ingelheim</li> <li>- Merck</li> <li>- Amgen</li> </ul> |
|     |      |      |                                                                                                                                                                | ivabradine   | not found in CPS or DPD    |                                                                                                                                                                                                                                                                                                                                                          |                                           |                                                                                                                                                             |
| 258 | 2012 | 2012 | Canadian Ophthalmological Society Evidence-Based Clinical Practice Guidelines for the Management of Diabetic Retinopathy                                       | ranibizumab  | Novartis Pharmaceuticals   | Lucentis                                                                                                                                                                                                                                                                                                                                                 | Canadian Ophthalmological Society [17,18] | <ul style="list-style-type: none"> <li>- None identified</li> </ul>                                                                                         |
| 260 | 2012 | 2012 | Managing Cardiometabolic Risk in Primary Care                                                                                                                  | metformin    | generic versions           |                                                                                                                                                                                                                                                                                                                                                          | None clearly identified                   | - n/a                                                                                                                                                       |
|     |      |      |                                                                                                                                                                | bupropion    | generic versions           |                                                                                                                                                                                                                                                                                                                                                          |                                           |                                                                                                                                                             |
|     |      |      |                                                                                                                                                                | varenicline  | Pfizer                     | Champix                                                                                                                                                                                                                                                                                                                                                  |                                           |                                                                                                                                                             |
| 267 | 2012 | 2012 | Evidence-Based Guideline for Neuropathic Pain Interventional Treatments: Spinal Cord Stimulation, Intravenous Infusions, Epidural Injections, and Nerve Blocks | lidocaine    | AstraZeneca, Hospira, Odan | EMLA Cream (AstraZeneca); EMLA Patch (AstraZeneca); Lidocaine Parenteral - Antiarrhythmic Agent (Hospira); Lidodan Endotracheal (Odan); Lidodan Viscous (Odan); Xylocaine Jelly 2% (AstraZeneca); Xylocaine Parenteral Without Epinephrine (AstraZeneca); Xylocaine Topical 4% (AstraZeneca); Xylocaine Viscous 2% (AstraZeneca); Xylocard (AstraZeneca) | Canadian Pain Society (CPS) [19]          | <ul style="list-style-type: none"> <li>- None identified</li> </ul>                                                                                         |
| 269 | 2012 | 2012 | Lenalidomide in                                                                                                                                                | lenalidomide | Celgene                    | Revlimid                                                                                                                                                                                                                                                                                                                                                 | Cancer Care                               | <ul style="list-style-type: none"> <li>- None identified</li> </ul>                                                                                         |

|     |      |      |                                                                                                                                                                             |                                               |                       |                                                                                                                                                                                                                                                           |                                                                                                                                                            |                                                                                                                                                                                                                                                                                                                                                         |
|-----|------|------|-----------------------------------------------------------------------------------------------------------------------------------------------------------------------------|-----------------------------------------------|-----------------------|-----------------------------------------------------------------------------------------------------------------------------------------------------------------------------------------------------------------------------------------------------------|------------------------------------------------------------------------------------------------------------------------------------------------------------|---------------------------------------------------------------------------------------------------------------------------------------------------------------------------------------------------------------------------------------------------------------------------------------------------------------------------------------------------------|
|     |      |      | Multiple Myeloma                                                                                                                                                            | dexamethasone                                 | Alcon, Sanofi-Aventis | dexamethasone/ciprofloxacin HCl = Ciprodex (Alcon);<br>dexamethasone/framycetin sulfate/gramicidin = Sofracort (Sanofi-Aventis);<br>dexamethasone/neomycin sulfate/polymixin B sulfate = Maxitrol (Alcon);<br>dexamethasone/tobramycin = Tobradex (Alcon) | Ontario (CCO) [8,9]                                                                                                                                        |                                                                                                                                                                                                                                                                                                                                                         |
|     |      |      |                                                                                                                                                                             | acetylsalicylic acid                          | generic versions      |                                                                                                                                                                                                                                                           |                                                                                                                                                            |                                                                                                                                                                                                                                                                                                                                                         |
|     |      |      |                                                                                                                                                                             | enoxaparin                                    | Sanofi-Aventis        | Lovenox; Lovenox HP                                                                                                                                                                                                                                       |                                                                                                                                                            |                                                                                                                                                                                                                                                                                                                                                         |
|     |      |      |                                                                                                                                                                             | granulocyte-colony stimulating factor (G-CSF) | Amgen                 | Neupogen (filgrastim)                                                                                                                                                                                                                                     |                                                                                                                                                            |                                                                                                                                                                                                                                                                                                                                                         |
| 273 | 2012 | 2012 | Risk Reduction of Prostate Cancer with Drugs or Nutritional Supplements                                                                                                     | finasteride                                   | generic versions      |                                                                                                                                                                                                                                                           | Cancer Care Ontario (CCO) [8,9]                                                                                                                            | - None identified                                                                                                                                                                                                                                                                                                                                       |
|     |      |      |                                                                                                                                                                             | dutasteride                                   | GlaxoSmithKline       | Avodart                                                                                                                                                                                                                                                   |                                                                                                                                                            |                                                                                                                                                                                                                                                                                                                                                         |
| 274 | 2012 | 2012 | The 2012 Canadian Hypertension Education Program Recommendations for the Management of Hypertension: Blood Pressure Measurement, Diagnosis, Assessment of Risk, and Therapy | acetylsalicylic acid                          | generic versions      |                                                                                                                                                                                                                                                           | Hypertension Canada,[20]<br>Canadian Pharmacy Association,[21]<br>Canadian Council of Cardiovascular Nurses,[22] Heart and Stroke Foundation of Canada[14] | Hypertension Canada<br>- Servier<br>- Pfizer<br>- Abbott<br>- Merck<br><br>Canadian Pharmacy Association<br>- None identified<br><br>Canadian Council of Cardiovascular Nurses<br>- AstraZeneca<br><br>Heart and Stroke Foundation<br>- Bayer Inc.<br>- Boehringer Ingelheim<br>- Bristol-Myers Squibb<br>- Pfizer<br>- Janssen<br>- Allergan<br>- Merz |
| 283 | 2012 | 2012 | New Oral                                                                                                                                                                    | dabigatran                                    | Boehringer-Ingelheim  | Pradax                                                                                                                                                                                                                                                    | Canadian Agency                                                                                                                                            | - None identified                                                                                                                                                                                                                                                                                                                                       |

|     |      |      |                                                                                                                                                                                                  |                                              |                                                |                                                                      |                                                   |                                                                                                                                                                                                                                                                                                                                                                                                   |
|-----|------|------|--------------------------------------------------------------------------------------------------------------------------------------------------------------------------------------------------|----------------------------------------------|------------------------------------------------|----------------------------------------------------------------------|---------------------------------------------------|---------------------------------------------------------------------------------------------------------------------------------------------------------------------------------------------------------------------------------------------------------------------------------------------------------------------------------------------------------------------------------------------------|
|     |      |      | Anticoagulants for the Prevention of Thromboembolic Events in Patients with Atrial Fibrillation                                                                                                  | rivaroxaban                                  | Bayer                                          | Xarelto                                                              | for Drugs and Technologies in Health (CADTH) [10] |                                                                                                                                                                                                                                                                                                                                                                                                   |
| 289 | 2012 | 2012 | The Role of Liver Resection in Colorectal Cancer Metastases                                                                                                                                      | oxaliplatin                                  | Sanofi-Aventis                                 | Eloxatin                                                             | Cancer Care Ontario (CCO) [8,9]                   | - None identified                                                                                                                                                                                                                                                                                                                                                                                 |
|     |      |      |                                                                                                                                                                                                  | irinotecan                                   | Pfizer                                         | Camptosar                                                            |                                                   |                                                                                                                                                                                                                                                                                                                                                                                                   |
| 295 | 2012 | 2012 | Chemotherapy (i.e., Gemcitabine, Docetaxel Plus Gemcitabine, Doxorubicin, or Trabectedin) for Inoperable, Locally Advanced, Recurrent, or Metastatic Uterine Leiomyosarcoma                      | doxorubicin                                  | Janssen                                        | Caelyx                                                               | Cancer Care Ontario (CCO) [8,9]                   | - None identified                                                                                                                                                                                                                                                                                                                                                                                 |
|     |      |      |                                                                                                                                                                                                  | Gemcitabine                                  | generic versions                               |                                                                      |                                                   |                                                                                                                                                                                                                                                                                                                                                                                                   |
|     |      |      |                                                                                                                                                                                                  | Docetaxel                                    | Hospira, Sanofi-Aventis                        | docetaxel, Taxotere                                                  |                                                   |                                                                                                                                                                                                                                                                                                                                                                                                   |
|     |      |      |                                                                                                                                                                                                  | granulocyte-colony stimulating factor (GCSF) | Amgen                                          | Neupogen (filgrastim)                                                |                                                   |                                                                                                                                                                                                                                                                                                                                                                                                   |
| 299 | 2012 | 2012 | Canadian Rheumatology Association Recommendations for the Pharmacological Management of Rheumatoid Arthritis with Traditional and Biologic Disease-modifying Antirheumatic Drugs: Part II Safety | methotrexate                                 | Hospira, Pfizer, Medexus                       | Methotrexate, Methotrexate injection, Methotrexate tablets, Metoject | Canadian Rheumatology Association [23]            | <ul style="list-style-type: none"> <li>- Abbvie Corporation</li> <li>- Pfizer Canada</li> <li>- Amgen Canada Inc.</li> <li>- Celgene Inc.</li> <li>- Janssen Inc.</li> <li>- Roche Canada</li> <li>- Bristol-Myers Squibb Canada Co.</li> <li>- GlaxoSmithKline Inc.</li> <li>- Hospira</li> <li>- UCB Canada Inc.</li> <li>- AstraZeneca Canada Inc.</li> <li>- Eli Lilly Canada Inc.</li> </ul> |
|     |      |      |                                                                                                                                                                                                  | abatacept                                    | Bristol-Myers Squibb                           | Orencia                                                              |                                                   |                                                                                                                                                                                                                                                                                                                                                                                                   |
|     |      |      |                                                                                                                                                                                                  | tocilizumab                                  | Roche                                          | Actemra                                                              |                                                   |                                                                                                                                                                                                                                                                                                                                                                                                   |
|     |      |      |                                                                                                                                                                                                  | influenza vaccine                            | Abbott, Sanofi-Pasteur, Novartis, AstraZeneca  | FluMist, Intanza, Agriflu, Influvac, Fluad                           |                                                   |                                                                                                                                                                                                                                                                                                                                                                                                   |
|     |      |      |                                                                                                                                                                                                  | pneumococcal vaccine                         | Sanofi-Pasteur, Merck, Pfizer, GlaxoSmithKline | Pneumo 23, Prevnar 13, Synflorix, Pneumovax 23                       |                                                   |                                                                                                                                                                                                                                                                                                                                                                                                   |
|     |      |      |                                                                                                                                                                                                  | hepatitis B vaccine                          | GlaxoSmithKline, Merck                         | Energix-B, Recombivax HB                                             |                                                   |                                                                                                                                                                                                                                                                                                                                                                                                   |
|     |      |      |                                                                                                                                                                                                  | herpes zoster vaccine                        | not found - unspecific                         |                                                                      |                                                   |                                                                                                                                                                                                                                                                                                                                                                                                   |
|     |      |      |                                                                                                                                                                                                  | hydroxychloroquine                           | Sanofi-Aventis                                 | Plaquenil                                                            |                                                   |                                                                                                                                                                                                                                                                                                                                                                                                   |
|     |      |      |                                                                                                                                                                                                  | sulfasalazine                                | generic versions                               |                                                                      |                                                   |                                                                                                                                                                                                                                                                                                                                                                                                   |
|     |      |      |                                                                                                                                                                                                  | rituximab                                    | Roche                                          | Rituxan                                                              |                                                   |                                                                                                                                                                                                                                                                                                                                                                                                   |
| 345 | 2012 | 2012 | Neonatal Abstinence Syndrome Clinical Practice Guidelines for Ontario                                                                                                                            | methadone                                    | Paladin                                        | Metadol                                                              | None clearly identified                           | - n/a                                                                                                                                                                                                                                                                                                                                                                                             |
|     |      |      |                                                                                                                                                                                                  | buprenorphine                                | Purdue Pharma, RB Pharmaceuticals              | Suboxone, BuTrans5, BuTrans10, BuTrans20                             |                                                   |                                                                                                                                                                                                                                                                                                                                                                                                   |
|     |      |      |                                                                                                                                                                                                  | morphine                                     | generic versions                               |                                                                      |                                                   |                                                                                                                                                                                                                                                                                                                                                                                                   |

|                               |      |      |                                                                                                                 |                           |                              |                                                                                  |                                                                                                                                                                                                                                                                                                                                       |                                                                                                                                                                                                                                                                                                                                                                                                                                                                                                                                                                                                                                                                                                                                                                                                                                                                                                                                                             |
|-------------------------------|------|------|-----------------------------------------------------------------------------------------------------------------|---------------------------|------------------------------|----------------------------------------------------------------------------------|---------------------------------------------------------------------------------------------------------------------------------------------------------------------------------------------------------------------------------------------------------------------------------------------------------------------------------------|-------------------------------------------------------------------------------------------------------------------------------------------------------------------------------------------------------------------------------------------------------------------------------------------------------------------------------------------------------------------------------------------------------------------------------------------------------------------------------------------------------------------------------------------------------------------------------------------------------------------------------------------------------------------------------------------------------------------------------------------------------------------------------------------------------------------------------------------------------------------------------------------------------------------------------------------------------------|
| 349                           | 2012 | 2012 | Management of Chronic Hepatitis B: Canadian Association for the Study of the Liver Consensus Guidelines         | hepatitis B vaccine       | GlaxoSmithKline, Merck       | Energix-B, Recombivax HB                                                         | Canadian Liver Foundation [24]                                                                                                                                                                                                                                                                                                        | <ul style="list-style-type: none"> <li>- Abbvie</li> <li>- Astellas</li> <li>- Bayer HealthCare Pharmaceuticals</li> <li>- Bristol-Myers Squibb</li> <li>- Gilead Sciences</li> <li>- Janssen</li> <li>- BTG</li> <li>- Merck</li> <li>- Vertex Pharmaceuticals</li> </ul>                                                                                                                                                                                                                                                                                                                                                                                                                                                                                                                                                                                                                                                                                  |
|                               |      |      |                                                                                                                 | PEG IFN                   | Roche, Merck                 | Peginterferon, Pegasys, Pegasys RBV (Pegasys and Copegus), Pegatron, Unitron PEG |                                                                                                                                                                                                                                                                                                                                       |                                                                                                                                                                                                                                                                                                                                                                                                                                                                                                                                                                                                                                                                                                                                                                                                                                                                                                                                                             |
|                               |      |      |                                                                                                                 | tenofovir                 | Gilead Sciences              | Viread, Atripla, Truvada                                                         |                                                                                                                                                                                                                                                                                                                                       |                                                                                                                                                                                                                                                                                                                                                                                                                                                                                                                                                                                                                                                                                                                                                                                                                                                                                                                                                             |
|                               |      |      |                                                                                                                 | entecavir                 | Bristol-Myers Squibb         | Baraclude                                                                        |                                                                                                                                                                                                                                                                                                                                       |                                                                                                                                                                                                                                                                                                                                                                                                                                                                                                                                                                                                                                                                                                                                                                                                                                                                                                                                                             |
|                               |      |      |                                                                                                                 | lamivudine                | ViiV Healthcare Shire Canada | 3TC, Heptovir, Kivexa, Trizivir, Combivir                                        |                                                                                                                                                                                                                                                                                                                                       |                                                                                                                                                                                                                                                                                                                                                                                                                                                                                                                                                                                                                                                                                                                                                                                                                                                                                                                                                             |
|                               |      |      |                                                                                                                 | emtricitabine             | Gilead Sciences              | Atripla, Truvada                                                                 |                                                                                                                                                                                                                                                                                                                                       |                                                                                                                                                                                                                                                                                                                                                                                                                                                                                                                                                                                                                                                                                                                                                                                                                                                                                                                                                             |
|                               |      |      |                                                                                                                 | hepatitis immune globulin | Talecris                     | HyperHEP B SD                                                                    |                                                                                                                                                                                                                                                                                                                                       |                                                                                                                                                                                                                                                                                                                                                                                                                                                                                                                                                                                                                                                                                                                                                                                                                                                                                                                                                             |
| 352                           | 2012 | 2012 | Recommendations of the 4 <sup>th</sup> Canadian Consensus Conference on the Diagnosis and Treatment of Dementia | risperidone               | generic versions             |                                                                                  | Canadian Institutes of Health Research, Fonds de la recherche en santé du Québec, Alzheimer Society of Canada, Consortium of Canadian Centres for Clinical Cognitive Research, Canadian Neurological Society, Canadian Academy of Geriatric Psychiatry, Quebec Network for Research on Aging, and Canadian Geriatrics Society [25–33] | <ul style="list-style-type: none"> <li>Canadian Institutes of Health Research <ul style="list-style-type: none"> <li>- None identified</li> </ul> </li> <li>Fonds de la recherche en santé du Québec <ul style="list-style-type: none"> <li>- AllerGen NCE Inc.</li> <li>- Merck Sharp &amp; Dohme</li> <li>- Pfizer Canada Inc.</li> </ul> </li> <li>Alzheimer Society of Canada <ul style="list-style-type: none"> <li>- Pfizer</li> <li>- Rx&amp;D</li> </ul> </li> <li>Consortium of Canadian Centres for Clinical Cognitive Research <ul style="list-style-type: none"> <li>- None identified</li> </ul> </li> <li>Canadian Neurological Society <ul style="list-style-type: none"> <li>- Biogen Idec</li> <li>- MS</li> <li>- Novartis Pharmaceuticals</li> <li>- Biocodex</li> <li>- Allergan</li> <li>- Eisai</li> <li>- Grifols</li> <li>- UCB</li> <li>- Teva</li> <li>- EMD Serono</li> <li>- Sunovion</li> <li>- Genzyme</li> </ul> </li> </ul> |
|                               |      |      |                                                                                                                 | olanzapine                | generic versions             |                                                                                  |                                                                                                                                                                                                                                                                                                                                       |                                                                                                                                                                                                                                                                                                                                                                                                                                                                                                                                                                                                                                                                                                                                                                                                                                                                                                                                                             |
|                               |      |      |                                                                                                                 | aripiprazole              | Bristol-Myers Squibb         | Abilify                                                                          |                                                                                                                                                                                                                                                                                                                                       |                                                                                                                                                                                                                                                                                                                                                                                                                                                                                                                                                                                                                                                                                                                                                                                                                                                                                                                                                             |
| Canadian Academy of Geriatric |      |      |                                                                                                                 |                           |                              |                                                                                  |                                                                                                                                                                                                                                                                                                                                       |                                                                                                                                                                                                                                                                                                                                                                                                                                                                                                                                                                                                                                                                                                                                                                                                                                                                                                                                                             |



|  |  |  |  |  |  |  |  |  |                                                                                                                                                         |
|--|--|--|--|--|--|--|--|--|---------------------------------------------------------------------------------------------------------------------------------------------------------|
|  |  |  |  |  |  |  |  |  | Psychiatry<br>- None identified<br>Quebec Network for Research on<br>Aging<br>- None identified<br><br>Canadian Geriatrics Society<br>- None identified |
|--|--|--|--|--|--|--|--|--|---------------------------------------------------------------------------------------------------------------------------------------------------------|

## References

1. EPICORE Centre Epidemiology Coordinating and Research Centre. Sponsors and Collaborators [Internet]. 2007 [cited 2015 Apr 10]. Available from: <http://www.epicore.ualberta.ca/compris/COMPRISsponsors.html>
2. Canadian Network for Mood and Anxiety Treatments (CANMAT). Welcome to CANMAT [Internet]. 2015 [cited 2015 May 15]. Available from: <http://www.canmat.org>
3. International Society for Bipolar Disorders (ISBD). Fiscal 2012 Annual Report [Internet]. 2013 [cited 2015 May 15]. Available from: [http://www.isbd.org/images/PDF/Annual\\_Report\\_2012.pdf](http://www.isbd.org/images/PDF/Annual_Report_2012.pdf)
4. Canadian Association of Medical Oncologists (CAMO). Home Page [Internet]. 2013 [cited 2015 May 7]. Available from: <http://cos.ca/camo/>
5. Canadian Cardiovascular Society (CCS). CCSA Donations: October 1, 2013-September 30, 2014 [Internet]. 2014 [cited 2015 May 7]. Available from: [http://www.ccs.ca/images/Academy/Donor\\_Slides\\_Final\\_for\\_web.pdf](http://www.ccs.ca/images/Academy/Donor_Slides_Final_for_web.pdf)
6. Canadian Cardiovascular Society (CCS). Recognizing our Donors [Internet]. 2015 [cited 2015 May 7]. Available from: <http://www.ccs.ca/index.php/en/ccs-academy/recognizing-our-donors>
7. Canadian Cardiovascular Society (CCS). Guideline Resources [Internet]. 2014 [cited 2015 May 15]. Available from: <http://ccs.ca/index.php/en/guideline-resources>
8. Cancer Care Ontario (CCO). Financial Statements [Internet]. 2013. Available from: <https://www.cancercare.on.ca/common/pages/UserFile.aspx?fileId=297935>
9. Cancer Care Ontario (CCO). Cancer Care Ontario Financial Statements [Internet]. 2014. Available from: <https://www.cancercare.on.ca/common/pages/UserFile.aspx?fileId=319494>
10. Canadian Association for Drugs and Technologies in Health (CADTH). Sponsors and Exhibitors [Internet]. 2015 [cited 2015 May 7]. Available from: <https://www.cadth.ca/sponsors-and-exhibitors>
11. Canadian Urological Association (CUA). Homepage [Internet]. 2015 [cited 2015 May 7]. Available from: <https://www.cua.org/en>
12. Kidney Cancer Research Network of Canada (KCRNC). Our Supporters [Internet]. 2015 [cited 2015 May 7]. Available from: <https://www.kcrnc.ca/main.php?action=login&go=/main.php?p=89>

13. Kidney Cancer Canada (KCC). Our Partners and Sponsors [Internet]. 2013 [cited 2015 May 7]. Available from: <http://www.kidneycancercanada.ca/about-us/our-partners-and-sponsors/>
14. Heart and Stroke Foundation. Our National Corporate Sponsors [Internet]. 2015 [cited 2015 May 7]. Available from: [http://www.heartandstroke.com/site/c.ikIQLcMWJtE/b.4389517/k.3AF2/Our\\_National\\_Corporate\\_Partners.htm](http://www.heartandstroke.com/site/c.ikIQLcMWJtE/b.4389517/k.3AF2/Our_National_Corporate_Partners.htm)
15. Headache Network Canada (HNC). Home [Internet]. 2012 [cited 2015 May 7]. Available from: <http://headachenetwork.ca/>
16. Association of Medical Microbiology and Infectious Disease Canada. Home [Internet]. 2011 [cited 2015 May 7]. Available from: <http://www.ammi.ca/>
17. Canadian Ophthalmological Society (COS). COS Affiliates [Internet]. 2015 [cited 2015 May 7]. Available from: <http://www.cos-sco.ca/about-cos/cos-affiliates/>
18. Canadian Ophthalmological Society (COS). Partners & Supporters [Internet]. 2015 [cited 2015 May 7]. Available from: <http://www.cos-sco.ca/about-cos/partners-supporters/>
19. Canadian Pain Society (CPS). Home [Internet]. 2015 [cited 2015 May 7]. Available from: [http://rheum.ca/en/events/upcoming\\_events/sponsors\\_and\\_exhibitors1](http://rheum.ca/en/events/upcoming_events/sponsors_and_exhibitors1)
20. Hypertension Canada. Supporters and Corporate Partners [Internet]. 2014 [cited 2015 May 7]. Available from: <https://www.hypertension.ca/en/supporters-and-corporate-partners>
21. Canadian Pharmacists Association (CPA). Partnerships [Internet]. 2015 [cited 2015 May 7]. Available from: <http://www.pharmacists.ca/index.cfm/about-cpha/partnerships/>
22. Canadian Council for Cardiovascular Nurses (CCCN). Sponsors [Internet]. 2015 [cited 2015 May 1]. Available from: <https://www.cccn.ca/content.php?doc=14>
23. Canadian Rheumatology Association (CRA). Sponsors and Exhibitors [Internet]. 2015 [cited 2015 May 7]. Available from: [http://rheum.ca/en/events/upcoming\\_events/sponsors\\_and\\_exhibitors1](http://rheum.ca/en/events/upcoming_events/sponsors_and_exhibitors1)
24. Canadian Liver Foundation. National Partners & Sponsors [Internet]. 2015 [cited 2015 May 7]. Available from: <http://www.liver.ca/who-we-are/National-Partners-Sponsors.aspx>
25. Canadian Consensus Conference on the Diagnosis and Treatment of Dementia (CCCDTD) - 2012. 2012 Canadian Consensus Conference on Dementia [Internet]. 2012 [cited 2015 May 7]. Available from: <http://www.cccdtd.ca/>

26. Canadian Institute for Health Information (CIHI). About CIHI [Internet]. 2014 [cited 2015 May 7]. Available from: <http://www.cihi.ca/CIHI-external/internet/EN/Theme/about+cihi/cihi010702>
27. Fonds de la recherche en santé du Québec. Nos Partenaires [Internet]. Wall Street Journal. 2015 [cited 2015 May 2]. Available from: <http://www.frqs.gouv.qc.ca/partenariat/nos-partenaires>
28. Alzheimer Society of Canada. Our Partners [Internet]. 2015 [cited 2015 May 7]. Available from: <http://www.alzheimer.ca/en/About-us/Our-partners>
29. Consortium of Canadian Centres for Clinical Cognitive Research (C5R). About [Internet]. 2015 [cited 2015 May 7]. Available from: <http://c5r.ca/aboutus/>
30. Canadian Neurological Sciences Federation. Our Generous Sponsors [Internet]. 2015 [cited 2015 May 7]. Available from: <http://www.cnsfederation.org/sponsors/>
31. Canadian Academy of Geriatric Psychiatry (CAGP). About CAGP [Internet]. 2015 [cited 2015 May 7]. Available from: <http://www.cagp.ca/>
32. Quebec Network for Research on Aging. Partners [Internet]. 2015 [cited 2015 May 7]. Available from: <http://www.rqrv.com/en/partenariats.php>
33. Canadian Geriatrics Society. Donor Recognition Wall [Internet]. 2015 [cited 2015 May 7]. Available from: [http://www.canadiangeriatrics.ca/default/assets/File/CGS\\_Donations\\_September\\_2014\\_wall.pdf](http://www.canadiangeriatrics.ca/default/assets/File/CGS_Donations_September_2014_wall.pdf)
